# Supplementary material for: Multi-electron redox reactivity of a samarium(ii) hydrido complex
Source: Royal Society of Chemistry journal article supplement (doi:10.1039/d4sc03104k), 2024-01-01
Supplement: d4sc03104k1.pdf [file d4sc03104k1.pdf]

## SUPPORTING INFORMATION

---

# Multi-Electron Redox Reactivity of A Samarium(II) Hydrido Complex

Xianghui Shi,<sup>a</sup> Peng Deng,<sup>a,b</sup> Thayalan Rajeshkumar,<sup>c</sup> Laurent Maron<sup>\*c</sup> and Jianhua Cheng<sup>\*a,b</sup>

[a] State Key Laboratory of Polymer Physics and Chemistry

Changchun Institute of Applied Chemistry

Chinese Academy of Sciences

No. 5625, Renmin Street, Changchun, Jilin, 130022 (China)

E-Mail: [jhcheng@ciac.ac.cn](mailto:jhcheng@ciac.ac.cn)

[b] School of Applied Chemistry and Engineering

University of Science and Technology of China

Hefei, Anhui, 230026 (China)

[c] Laboratoire de Physique et Chimie des Nano-objets

Institut National des Sciences Appliquées

31077 Toulouse Cedex 4 (France)

E-mail: [laurent.maron@irsamc.ups-tlse.fr](mailto:laurent.maron@irsamc.ups-tlse.fr)

### Contents Page

|                                                         |      |
|---------------------------------------------------------|------|
| 1. Experimental section and NMR spectra.....            | S3   |
| 2. X-ray crystallographic studies .....                 | S23  |
| 3. Tables of crystal data and structure refinement..... | S25  |
| 4. Molecular structure of complexes .....               | S32  |
| 5. DFT calculations.....                                | S40  |
| 6. References .....                                     | S131 |

## General remarks

All reactions were carried out under a dry and oxygen-free nitrogen atmosphere using Schlenk techniques and a Vigor glovebox. The nitrogen in the glovebox was constantly circulated through a copper/molecular sieves (4 Å) catalyst unit. The oxygen and moisture concentrations in the glovebox atmosphere were monitored using an O<sub>2</sub>(GE)/H<sub>2</sub>O (Xentaur) analyzer to ensure that both were always below 0.1 ppm. Toluene, hexane and Et<sub>2</sub>O were purified by use of a Vigor VSPS-5 solvent purification system, and dried over fresh Na chips in the glovebox. Tetrahydropyran (THP), pentane and benzene-*d*<sub>6</sub> were distilled from Na/K alloy/benzophenone ketyl, degassed by the freeze-pump-thaw method (three times), and dried over fresh Na chips in the glovebox. [KCH(SiMe<sub>3</sub>)<sub>2</sub>]<sup>[1]</sup>, [SmI<sub>2</sub>(THF)<sub>5</sub>]<sup>[2]</sup> and [(Cp<sup>Ar5</sup>)H] (Cp<sup>Ar5</sup>=C<sub>5</sub>Ar<sub>5</sub>, Ar = 3,5-*i*-Pr<sub>2</sub>-C<sub>6</sub>H<sub>3</sub>)<sup>[3]</sup> were synthesized according to the published procedures. Other commercially available reagents were used without purification.

Samples for NMR spectroscopic measurements were prepared in the glovebox by use of J. Young valve NMR tubes. <sup>1</sup>H, <sup>2</sup>H and <sup>13</sup>C NMR spectra were recorded on a Bruker AV400 or AV500 spectrometer and referenced to the resonances of the solvent used. IR spectra of solid samples were measured with a Nicolet IS5 spectrometer and Diamond ATR accessory was placed in a glovebox (argon atmosphere). All magnetization data were recorded on a Quantum Design MPMS-XL7 SQUID magnetometer equipped with a 7 T magnet. Magnetic moments were collected with an external magnetic field of 1000 Oe at 300 K. The elemental analyses were performed on Elementar Vario EL cube (WO<sub>3</sub> was used as pro-oxidant) at National Analytical Research Centre of Changchun Institute of Applied Chemistry (CIAC).

## Synthetic and analytical data for new complexes

### Synthesis of $[(\text{Cp}^{\text{Ar5}})\text{K}(\text{THF})_2]$ (**1**)

Solid of KH (231 mg, 5.76 mmol) was added to a stirred solution of  $(\text{Cp}^{\text{Ar5}})\text{H}$  (2.5 g, 2.88 mmol) in THF (30 mL). The mixture was stirred for 24 h at room temperature and then filtered. The filtrate was evaporated under reduced pressure to dryness and washed with cold hexane (5 mL x 3) to give complex **1** (2.66 g, 2.53 mmol, 88% yield) as colorless powder. Single crystals of complex **1** suitable for X-ray analysis were grown from hexane/toluene solution at  $-30\text{ }^\circ\text{C}$  as colorless crystals. Crystal data of **1**: Triclinic, P-1;  $a = 9.7490(18)\text{ \AA}$ ,  $b = 14.689(3)\text{ \AA}$ ,  $c = 23.623(4)\text{ \AA}$ ;  $\alpha = 92.911(4)^\circ$ ,  $\beta = 95.753(3)^\circ$ ,  $\gamma = 93.301(4)^\circ$ ;  $V = 3354.7(10)\text{ \AA}^3$ ,  $Z = 2$ ,  $R_{\text{int}} = 0.0286$ ,  $R_{\text{sigma}} = 0.0138$ .

$^1\text{H}$  NMR (500 MHz,  $\text{C}_6\text{D}_6$ ,  $25\text{ }^\circ\text{C}$ ):  $\delta = 1.16$  (d,  $^3J_{\text{HH}} = 7\text{ Hz}$ , 60H,  $\text{CH}(\text{CH}_3)_2$ ), 1.39 (m, 8H, THF), 2.71 (sept,  $^3J_{\text{HH}} = 7\text{ Hz}$ , 10H,  $\text{CH}(\text{CH}_3)_2$ ), 3.44 (m, 8H, THF), 6.81 (s, 5H, aryl), 6.86 (d,  $^3J_{\text{HH}} = 2\text{ Hz}$ , 10H, aryl) ppm.  $^{13}\text{C}$   $\{^1\text{H}\}$  NMR (125 MHz,  $\text{C}_6\text{D}_6$ ,  $25\text{ }^\circ\text{C}$ ):  $\delta = 24.02$  (s,  $\text{CH}(\text{CH}_3)_2$ ), 25.35 (s, THF), 34.10 (s,  $\text{CH}(\text{CH}_3)_2$ ), 67.50 (s, THF), 118.98 (s, aryl), 121.41 (s, Cp), 127.10 (s, aryl), 141.58 (s, aryl), 146.93 (s, aryl) ppm. Anal. calcd. for (**1**)  $\text{C}_{73}\text{H}_{101}\text{O}_2\text{K}_1$  (1049.68): C, 83.53; H, 9.70 found: C, 83.77; H, 9.46. IR: 3496 (br), 2953 (s), 2868 (s), 1921 (w), 1726 (w), 1587 (s), 1468 (s), 1362 (m), 1330 (w), 1187 (m), 1132 (w), 1044 (s), 980 (m), 887 (s), 864 (s), 763 (w), 709 (s), 664 (m), 608 (m), 509 (s)  $\text{cm}^{-1}$ .

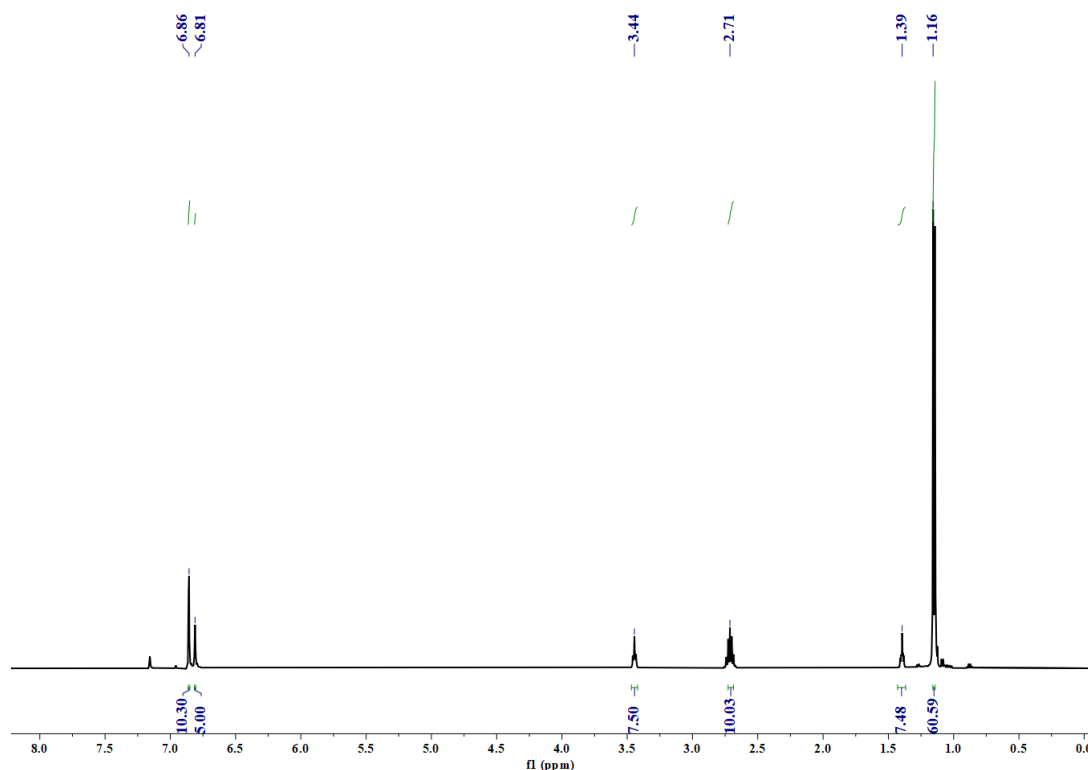

**Figure S1.**  $^1\text{H}$  NMR spectrum (500 MHz) of  $[(\text{Cp}^{\text{Ar5}})\text{K}(\text{THF})_2]$  (**1**) in  $\text{C}_6\text{D}_6$  at  $25\text{ }^\circ\text{C}$ .

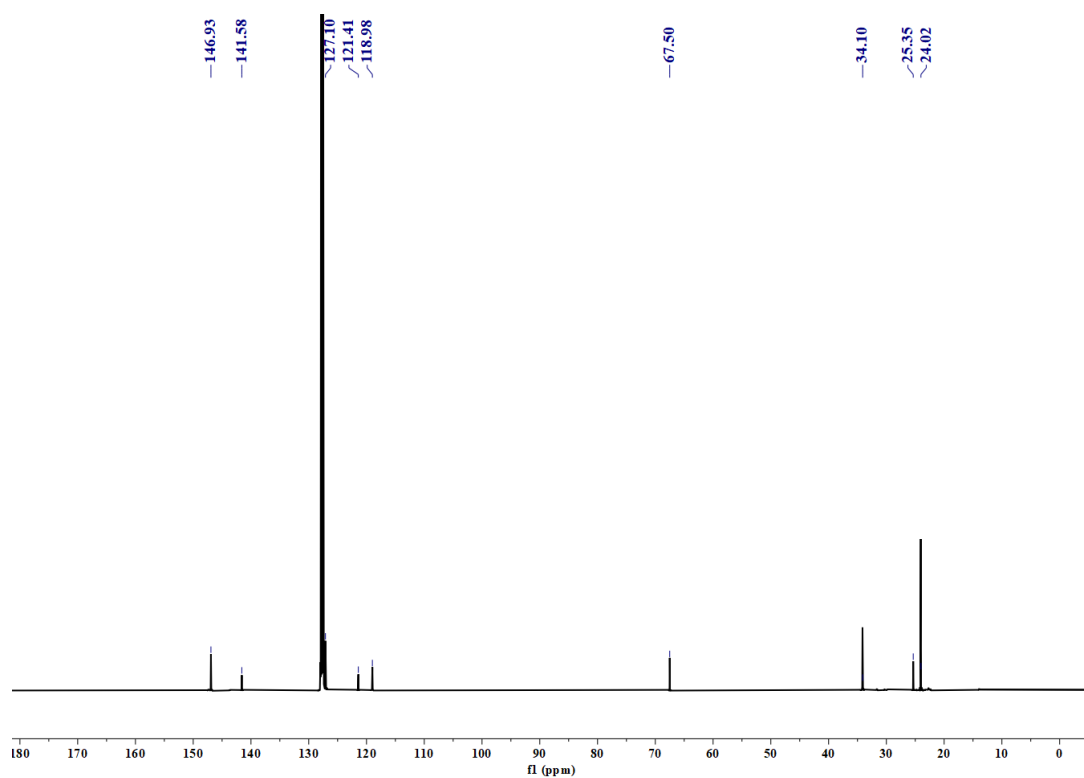

**Figure S2.**  $^{13}\text{C}$   $\{^1\text{H}\}$  NMR spectrum (125 MHz) of  $[(\text{Cp}^{\text{Ar5}})\text{K}(\text{THF})_2]$  (**1**) in  $\text{C}_6\text{D}_6$  at 25 °C.

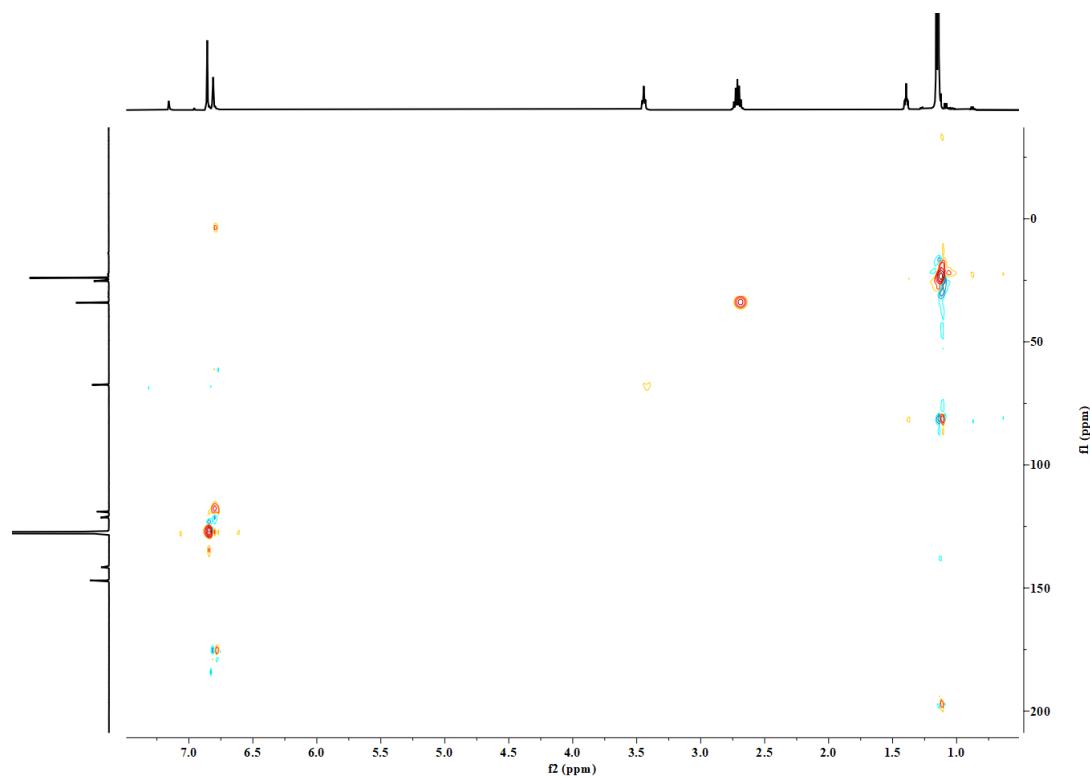

**Figure S3.**  $^1\text{H}$ - $^{13}\text{C}$  HSQC NMR spectrum (500 MHz) of  $[(\text{Cp}^{\text{Ar5}})\text{K}(\text{THF})_2]$  (**1**) in  $\text{C}_6\text{D}_6$  at 25 °C.

**Synthesis of  $[(\text{Cp}^{\text{Ar5}})\text{Sm}^{\text{II}}(\mu\text{-I})(\text{DABCO})]_2$  (**2**)**

$[\text{SmI}_2(\text{THF})_5]$  (765 mg, 1.00 mmol) and  $[\text{Cp}^{\text{Ar5}}\text{K}(\text{THF})_2]$  (**1**) (1.05 g, 1.00 mmol) were combined into a schlenk flask and dissolved in 30 mL of THF. The reaction mixture was heated to 80 °C and stirred for 12 h. Afterwards, the dark-green solution was filtered and all volatiles of the filtrate were removed *in vacuo*. To the residue was added a solution of DABCO (224 mg, 2.00 mmol) in benzene (10 mL) and stirred at room temperature for 30 minutes. The benzene solvent was evaporated under reduced pressure to give complex **2** (1.16 g, 0.46 mmol, 92% yield) as dark-green powder. Single crystals of **2**•(Hexane) suitable for X-ray analysis were grown from hexane/toluene solution at -30 °C as dark-green crystals.

$^1\text{H}$  NMR (500 MHz,  $\text{C}_6\text{D}_6$ , 25 °C):  $\delta$  = -0.28, 0.43 (br, 12H, DABCO), 2.47 (br, 60H,  $\text{CH}(\text{CH}_3)_2$ ), 3.83 (br, 10H,  $\text{CH}(\text{CH}_3)_2$ ), 7.38 (br, 5H, aryl), 10.02 (br, 10H, aryl) ppm.  $^{13}\text{C}$   $\{^1\text{H}\}$  NMR (125 MHz,  $\text{C}_6\text{D}_6$ , 25 °C):  $\delta$  = 25.24 (s,  $\text{CH}(\text{CH}_3)_2$ ), 34.97 (s,  $\text{CH}(\text{CH}_3)_2$ ), 53.59 (s, DABCO), 122.32 (s, aryl), 130.87, 152.38, 187.31 ppm. Detailed identification of the signals could not be performed due to paramagnetism of samarium(II). Magnetic moment (300K):  $\mu_{\text{eff}} = 3.2 \mu_B$ . Anal. calcd. for (**2**)  $\text{C}_{142}\text{H}_{194}\text{I}_2\text{N}_4\text{Sm}_2$  (2511.50): C, 67.91; H, 7.79; N, 2.23; found: C, 67.76; H, 7.61; N, 2.30. IR: 2953 (s), 2866 (s), 1970 (w), 1590 (s), 1459 (s), 1321 (m), 1056 (s), 994 (m), 869 (s), 824 (w), 768 (s), 710 (s), 652 (m), 608 (m), 556 (m), 531 (m), 508 (s)  $\text{cm}^{-1}$ .

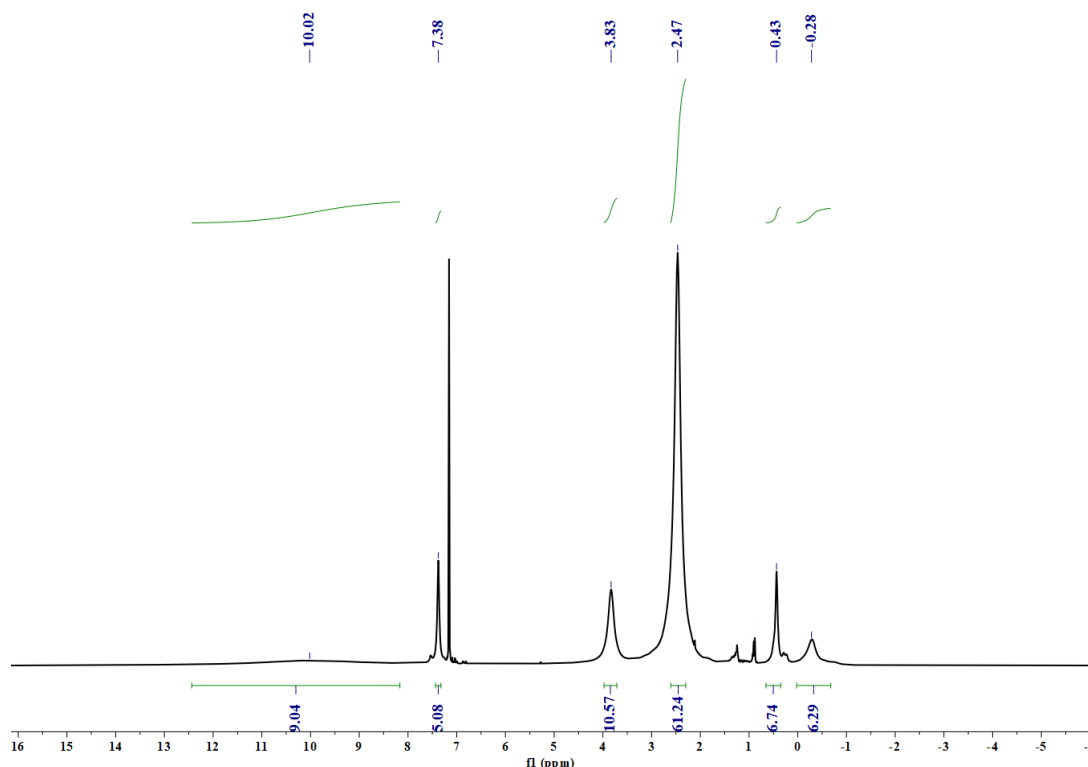

**Figure S4.**  $^1\text{H}$  NMR spectrum (500 MHz) of  $[(\text{Cp}^{\text{Ar5}})\text{Sm}^{\text{II}}(\mu\text{-I})(\text{DABCO})]_2$  (**2**) in  $\text{C}_6\text{D}_6$  at 25 °C.

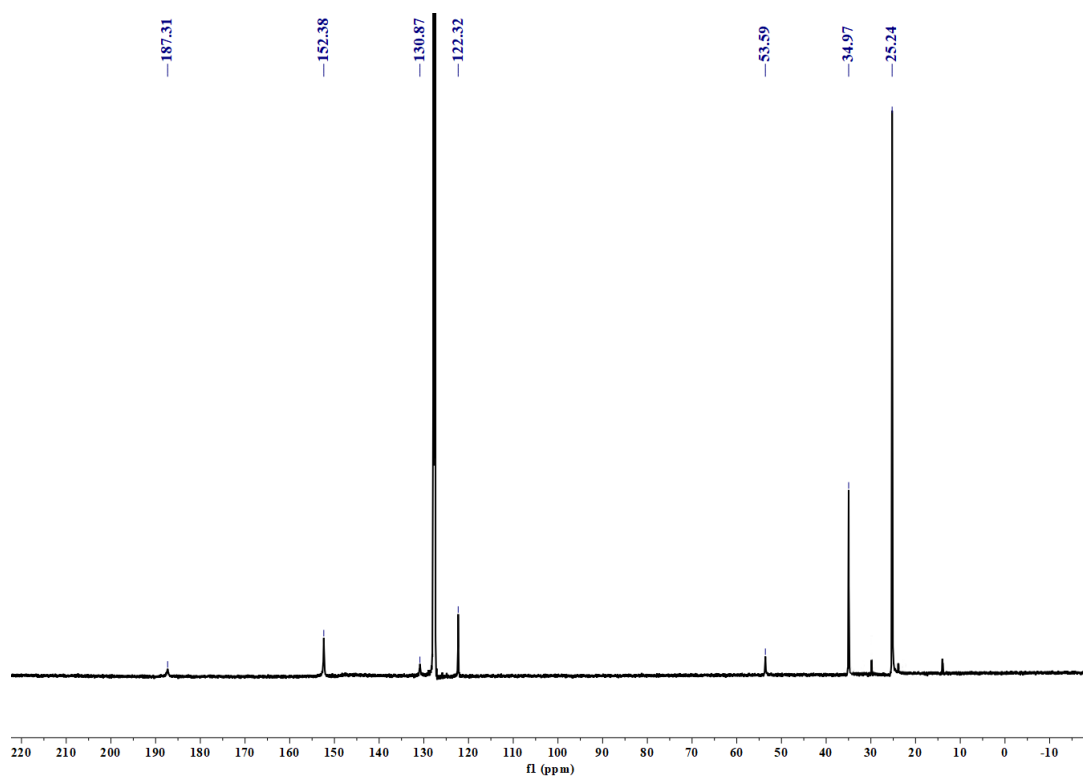

**Figure S5.**  $^{13}\text{C}$   $\{^1\text{H}\}$  NMR spectrum (125 MHz) of  $[(\text{Cp}^{\text{Ar5}})\text{Sm}^{\text{II}}(\mu\text{-I})(\text{DABCO})]_2$  (**2**) in  $\text{C}_6\text{D}_6$  at 25 °C.

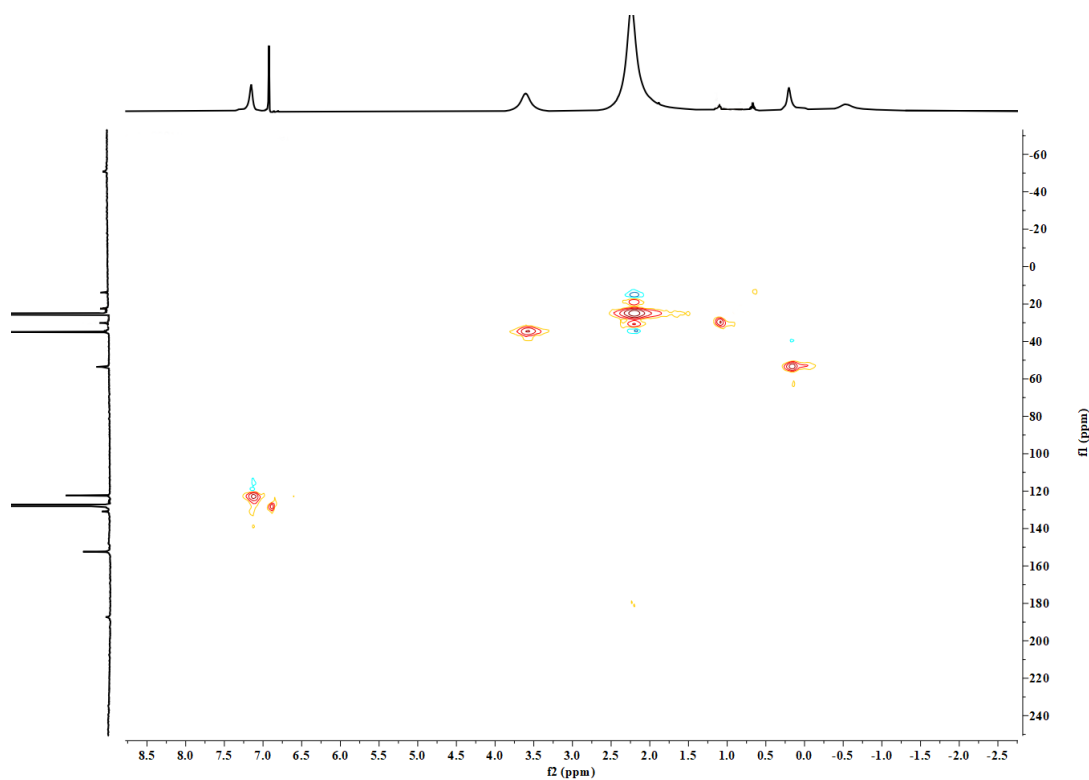

**Figure S6.**  $^1\text{H}$ - $^{13}\text{C}$  HSQC NMR spectrum (500 MHz) of  $[(\text{Cp}^{\text{Ar5}})\text{Sm}^{\text{II}}(\mu\text{-I})(\text{DABCO})]_2$  (**2**) in  $\text{C}_6\text{D}_6$  at 25 °C.

**Synthesis of  $[(\text{Cp}^{\text{Ar5}})\text{Sm}^{\text{II}}\{\text{CH}(\text{SiMe}_3)_2\}(\text{DABCO})]$  (**3**)**

Solid of  $[\text{KCH}(\text{SiMe}_3)_2]$  (159 mg, 0.80 mmol) was added in several portions to a stirred solution of  $[(\text{Cp}^{\text{Ar5}})\text{Sm}^{\text{II}}(\mu\text{-I})(\text{DABCO})]_2$  (**2**) (1.0 g, 0.40 mmol) in benzene (15 mL) at  $-30\text{ }^\circ\text{C}$ . The mixture was stirred at  $-30\text{ }^\circ\text{C}$  for 1 h and at room temperature for 2 h, then filtered. After evaporation of all the volatiles *in vacuo*, the residue was extracted twice with hexane (15 mLx2). The hexane solvent was removed under reduced pressure to give complex **3** (882 mg, 0.69 mmol, 86% yield) as dark-brown powder.

$^1\text{H}$  NMR (500 MHz,  $\text{C}_6\text{D}_6$ ,  $25\text{ }^\circ\text{C}$ ):  $\delta = -2.31$  (br, 12H, DABCO), 3.25 (br, 60H,  $\text{CH}(\text{CH}_3)_2$ ), 4.93 (br, 18H,  $\text{Sm-CH}(\text{SiMe}_3)_2$ ), 5.94 (br, 10H,  $\text{CH}(\text{CH}_3)_2$ ), 8.31 (s, 5H, aryl), 16.33 (br, 10H, aryl) ppm.  $^{13}\text{C}$   $\{^1\text{H}\}$  NMR (125 MHz,  $\text{C}_6\text{D}_6$ ,  $25\text{ }^\circ\text{C}$ ):  $\delta = 25.86$  (s,  $\text{CH}(\text{CH}_3)_2$ ), 37.16 (s,  $\text{CH}(\text{CH}_3)_2$ ), 52.91 (s, DABCO), 125.77 (s, aryl), 150.33, 153.93, 183.17 ppm. Detailed identification of the signals could not be performed due to paramagnetism of samarium(II). Anal. calcd. for (**3**)  $\text{C}_{78}\text{H}_{116}\text{N}_2\text{Si}_2\text{Sm}_1$  (1288.33): C, 72.72; H, 9.08; N, 2.17; found: C, 72.96; H, 9.21; N, 2.25. IR: 3625 (w), 2955 (s), 2869 (s), 2118 (w), 2064 (w), 1779 (w), 1593 (s), 1461 (s), 1379 (m), 1316 (m), 1250 (w), 1186 (w), 1106 (m), 1057 (s), 990 (w), 921 (w), 870 (s), 842 (m), 765 (m), 712 (m), 641 (w), 610 (w)  $\text{cm}^{-1}$ .

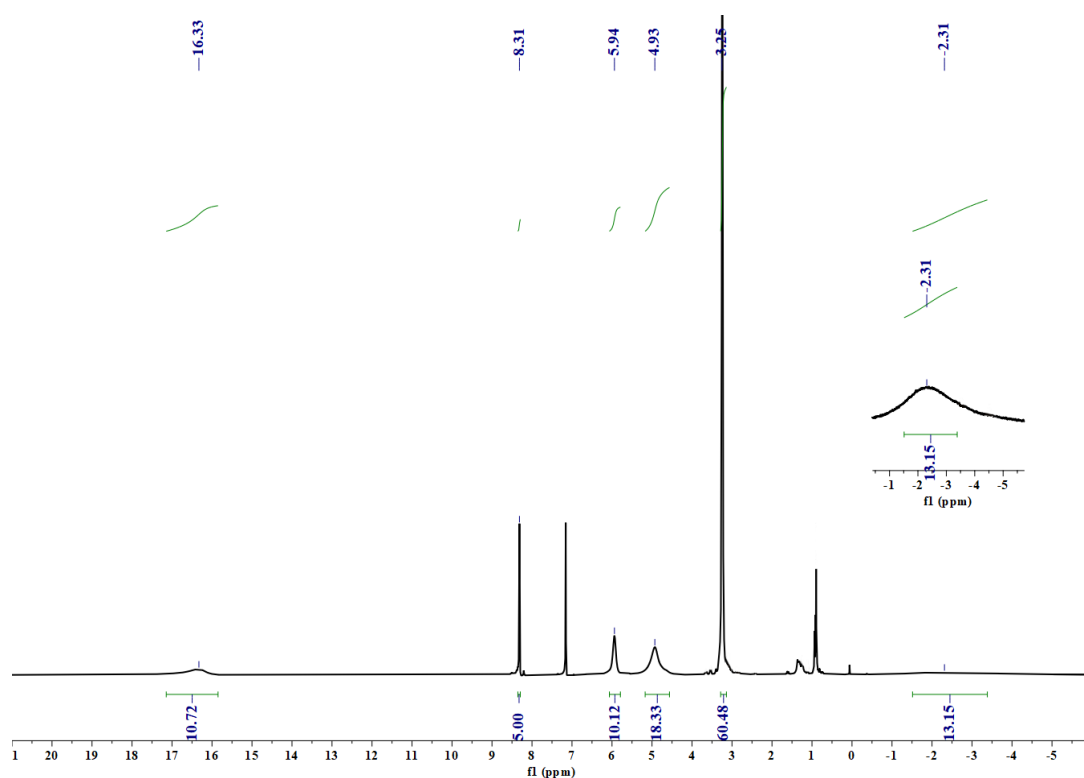

**Figure S7.**  $^1\text{H}$  NMR spectrum (500 MHz) of  $[(\text{Cp}^{\text{Ar5}})\text{Sm}^{\text{II}}\{\text{CH}(\text{SiMe}_3)_2\}(\text{DABCO})]$  (**3**) in  $\text{C}_6\text{D}_6$  at  $25\text{ }^\circ\text{C}$ .



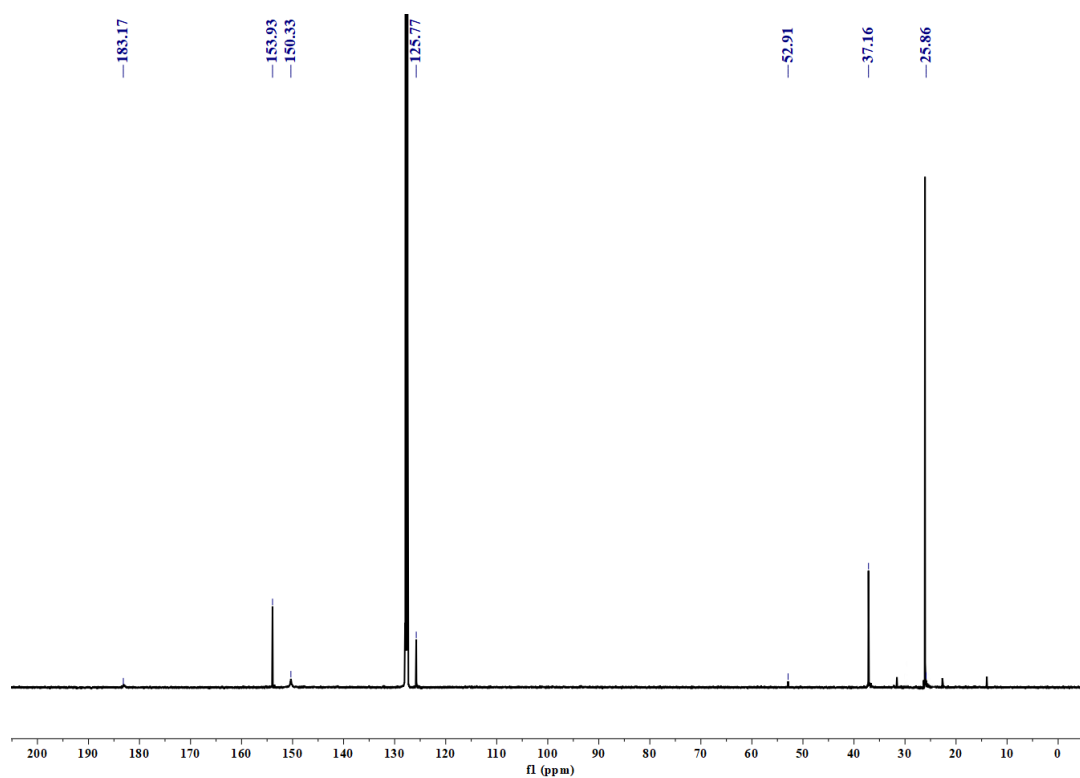

**Figure S8.**  $^{13}\text{C}$   $\{^1\text{H}\}$  NMR spectrum (125 MHz) of  $[(\text{Cp}^{\text{Ar5}})\text{Sm}^{\text{II}}\{\text{CH}(\text{SiMe}_3)_2\}(\text{DABCO})]$  (**3**) in  $\text{C}_6\text{D}_6$  at 25 °C.

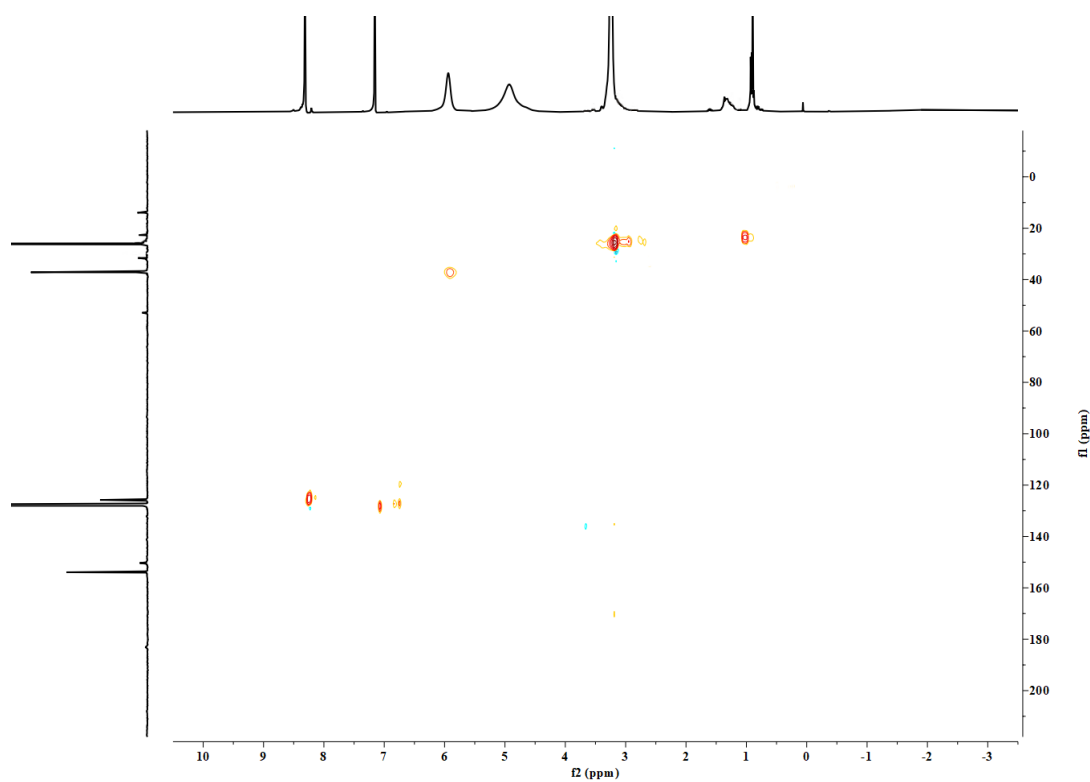

**Figure S9.**  $^1\text{H}$ - $^{13}\text{C}$  HSQC NMR spectrum (500 MHz) of  $[(\text{Cp}^{\text{Ar5}})\text{Sm}^{\text{II}}\{\text{CH}(\text{SiMe}_3)_2\}(\text{DABCO})]$  (**3**) in  $\text{C}_6\text{D}_6$  at 25 °C.

**Synthesis of  $[(\text{Cp}^{\text{Ar5}})\text{Sm}^{\text{II}}(\mu\text{-H})(\text{DABCO})]_2$  (**4**)**

A solution of  $[(\text{Cp}^{\text{Ar5}})\text{Sm}^{\text{II}}\{\text{CH}(\text{SiMe}_3)_2\}(\text{DABCO})]$  (**3**) (528 mg, 0.41 mmol) in hexane (5 mL) was added into a glass tube in a medium-pressure autoclave. The autoclave was transferred outside of the glovebox and pressurized with  $\text{H}_2$  to 20 atm. The mixture was left standing at room temperature for 24 h to precipitate complex **4** (361 mg, 0.16 mmol, 78% yield) as dark-brown crystalline solid. Single crystals of complex **4**•(DABCO) suitable for X-ray analysis were grown from hexane solution containing free DABCO as dark-brown crystals at room temperature.

$^1\text{H}$  NMR (500 MHz,  $\text{C}_6\text{D}_6$ , 25 °C):  $\delta$  = 1.63 (br, 1H, Sm-H), 1.81 (br, 12H, DABCO), 2.61 (br, 60H,  $\text{CH}(\text{CH}_3)_2$ ), 5.32 (br, 10H,  $\text{CH}(\text{CH}_3)_2$ ), 7.44 (br, 10H, aryl), 7.81 (br, 5H, aryl) ppm.  $^{13}\text{C}\{^1\text{H}\}$  NMR (125 MHz,  $\text{C}_6\text{D}_6$ , 25 °C):  $\delta$  = -25.08, 27.74 (s,  $\text{CH}(\text{CH}_3)_2$ ), 35.21 (s,  $\text{CH}(\text{CH}_3)_2$ ), 122.56 (s, aryl), 150.79, 152.11, 185.25 ppm. Detailed identification of the signals could not be performed due to paramagnetism of samarium(II). Magnetic moment (300K):  $\mu_{\text{eff}} = 3.9 \mu_B$ . Anal. calcd. for (**4**)  $\text{C}_{142}\text{H}_{196}\text{N}_4\text{Sm}_2$  (2259.72): C, 75.47; H, 8.74; N, 2.48; found: C, 75.63; H, 8.81; N, 2.55. IR: 3622 (w), 2956 (s), 2869 (s), 1760 (w), 1593 (s), 1462 (s), 1379 (m), 1315 (s), 1255 (w), 1186 (w), 1103 (m), 1058 (s), 988 (w), 927 (m), 870 (s), 827 (w), 766 (m), 711(s), 639 (w), 521 (m)  $\text{cm}^{-1}$ .

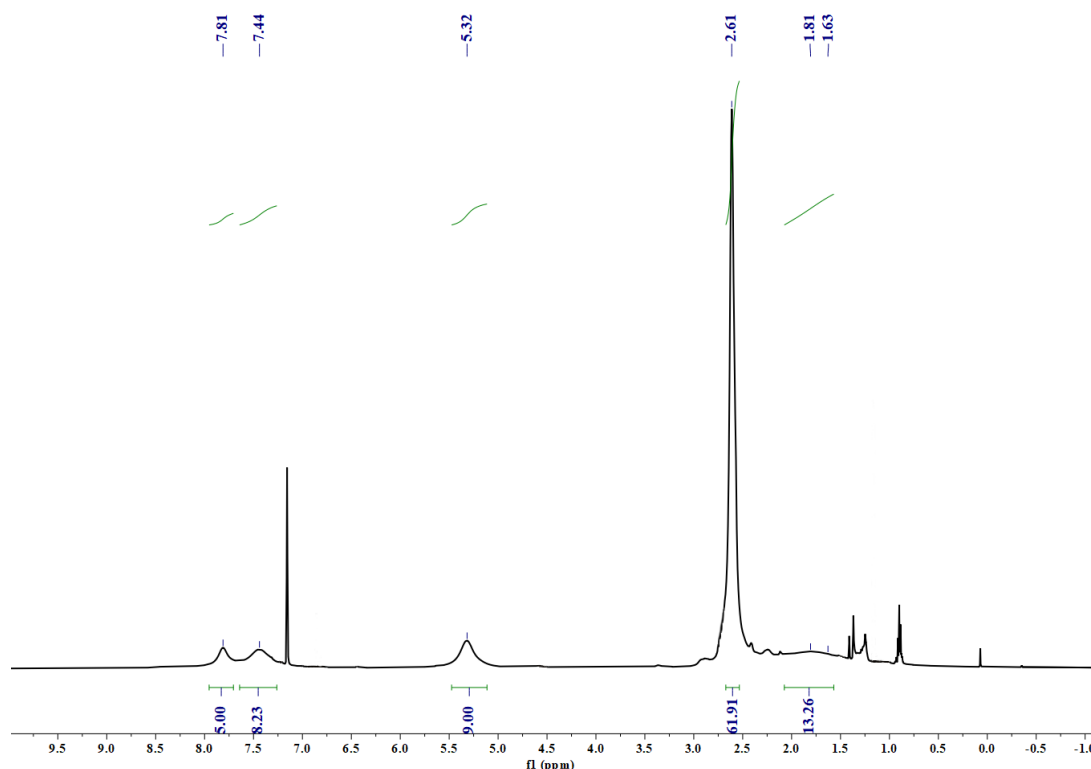

**Figure S10.**  $^1\text{H}$  NMR spectrum (500 MHz) of  $[(\text{Cp}^{\text{Ar5}})\text{Sm}^{\text{II}}(\mu\text{-H})(\text{DABCO})]_2$  (**4**) in  $\text{C}_6\text{D}_6$  at 25 °C.

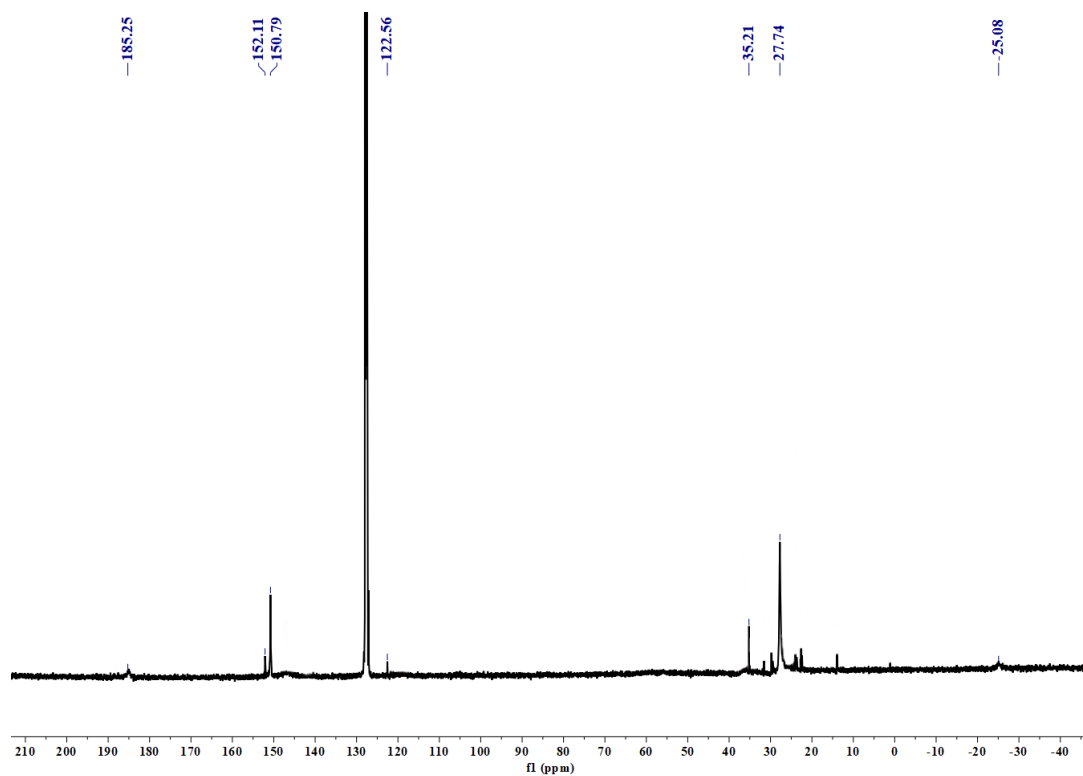

**Figure S11.**  $^{13}\text{C}\{^1\text{H}\}$  NMR spectrum (125 MHz) of  $[(\text{Cp}^{\text{Ar5}})\text{Sm}^{\text{II}}(\mu\text{-H})(\text{DABCO})_2]$  (**4**) in  $\text{C}_6\text{D}_6$  at 25 °C.

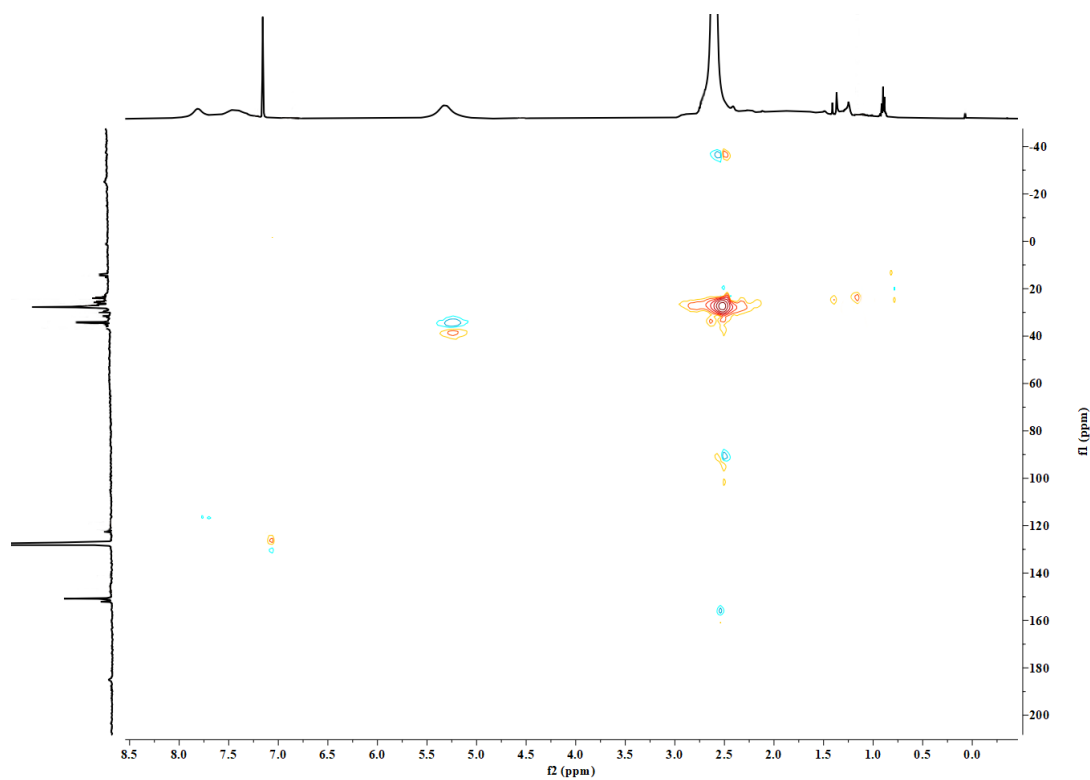

**Figure S12.**  $^1\text{H}$ - $^{13}\text{C}$  HSQC NMR spectrum (500 MHz) of  $[(\text{Cp}^{\text{Ar5}})\text{Sm}^{\text{II}}(\mu\text{-H})(\text{DABCO})_2]$  (**4**) in  $\text{C}_6\text{D}_6$  at 25 °C.

**Syntheses of  $[(\text{Cp}^{\text{Ar5}})\text{Sm}^{\text{II}}(\mu\text{-D})(\text{DABCO})]_2$  (**4-D**)**

The synthesis of complex **4-D** was analogous to that of complex **4** except for the use of deuteride gas  $\text{D}_2$  (15 atm, 3 days).

$^2\text{H}$  NMR (77 MHz,  $\text{C}_6\text{D}_6$ , 25 °C) for  $[(\text{Cp}^{\text{Ar5}})\text{Sm}^{\text{II}}(\mu\text{-D})(\text{DABCO})]_2$ :  $\delta = 1.63$  (br, Sm-D) ppm.  
IR: 3622 (w), 2958 (s), 2870 (s), 1745 (w), 1593 (s), 1463 (s), 1379 (m), 1314 (m), 1254 (w), 1186 (w), 1107 (m), 1059 (s), 991 (w), 923 (m), 871 (s), 826 (w), 765 (m), 712 (s), 671 (w), 508 (m)  $\text{cm}^{-1}$ .

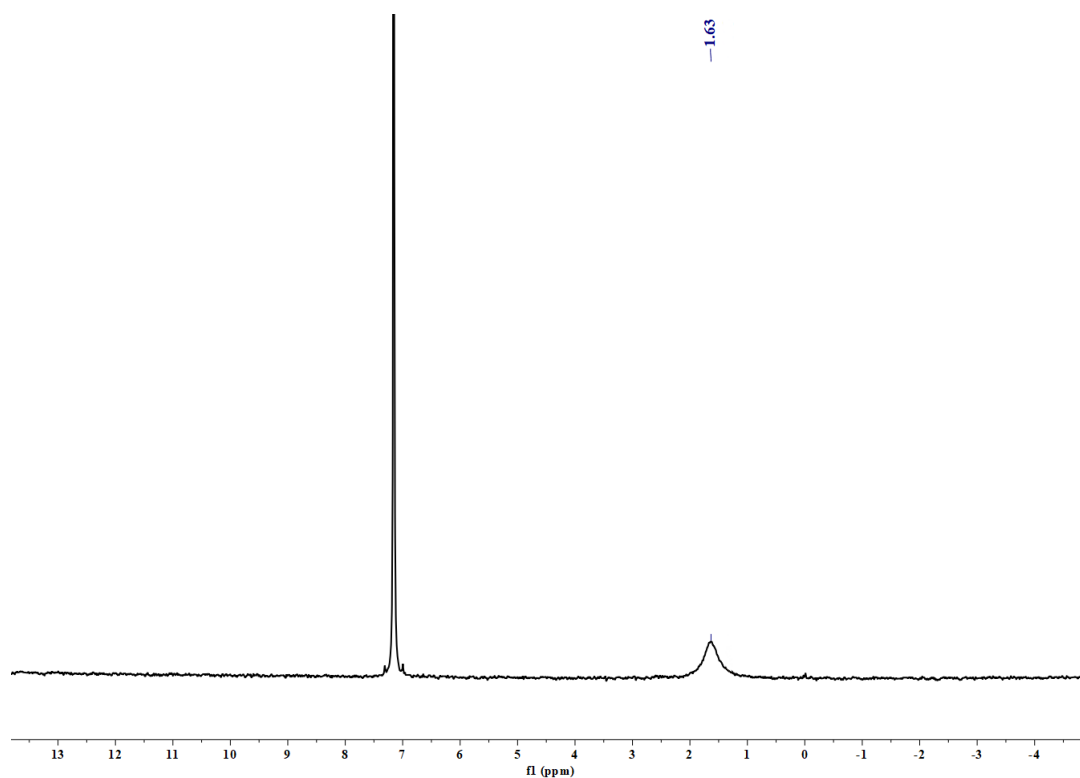

**Figure S13.**  $^2\text{H}$  NMR spectrum (77 MHz) of  $[(\text{Cp}^{\text{Ar5}})\text{Sm}^{\text{II}}(\mu\text{-D})(\text{DABCO})]_2$  (**4-D**) in  $\text{C}_6\text{H}_6$  at 25 °C.  
(Drops of  $\text{C}_6\text{D}_6$  were added as internal standard)

**Synthesis of  $[(\text{Cp}^{\text{Ar5}})_2\text{Sm}^{\text{II}}]$  (**5**)**

A solution of  $[(\text{Cp}^{\text{Ar5}})\text{Sm}^{\text{II}}(\mu\text{-H})(\text{DABCO})]_2$  (**4**) (100 mg, 0.044 mmol) in THF (5 mL) was stirred at room temperature for 2 h. The resulting dark-purple mixture was filtered and all volatiles of the filtrate were removed under reduced pressure to give complex **5** (68 mg, 0.036 mmol, 82% yield) as dark-purple powder. Single crystals of complex **5** suitable for X-ray analysis were grown from hexane/toluene solution at  $-30\text{ }^\circ\text{C}$  as dark-purple crystals.

$^1\text{H}$  NMR (500 MHz,  $\text{C}_6\text{D}_6$ ,  $25\text{ }^\circ\text{C}$ ):  $\delta = 2.13$  (br, 60H,  $\text{CH}(\text{CH}_3)_2$ ), 6.00 (br, 10H,  $\text{CH}(\text{CH}_3)_2$ ), 8.21 (br, 5H, aryl) ppm.  $^{13}\text{C}$   $\{^1\text{H}\}$  NMR (125 MHz,  $\text{C}_6\text{D}_6$ ,  $25\text{ }^\circ\text{C}$ ):  $\delta = -71.13$ , 25.15 (s,  $\text{CH}(\text{CH}_3)_2$ ), 35.55 (s,  $\text{CH}(\text{CH}_3)_2$ ), 121.73, 153.24, 188.92 ppm. Detailed identification of the signals could not be performed due to paramagnetism of samarium(II). Anal. calcd. for (**5**)  $\text{C}_{130}\text{H}_{170}\text{Sm}_1$  (1883.00): C, 82.92; H, 9.10; found: C, 83.08; H, 9.24. IR: 3131 (br), 2954 (s), 2867 (s), 2225 (w), 1909 (w), 1587(s), 1511 (m), 1458 (s), 1278 (s), 1089 (w), 1010 (m), 979 (m), 863 (s), 706 (s), 595 (m), 554 (m), 519 (w)  $\text{cm}^{-1}$ .

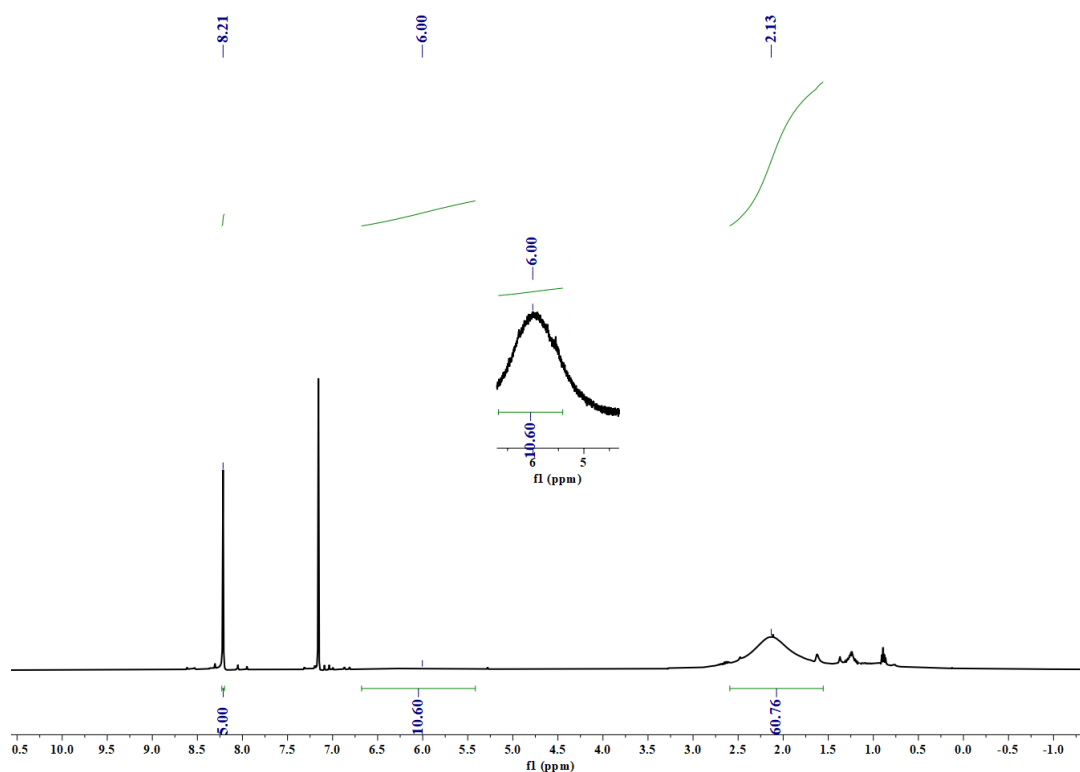

**Figure S14.**  $^1\text{H}$  NMR spectrum (500 MHz) of  $[(\text{Cp}^{\text{Ar5}})_2\text{Sm}^{\text{II}}]$  (**5**) in  $\text{C}_6\text{D}_6$  at  $25\text{ }^\circ\text{C}$ .

## SUPPORTING INFORMATION

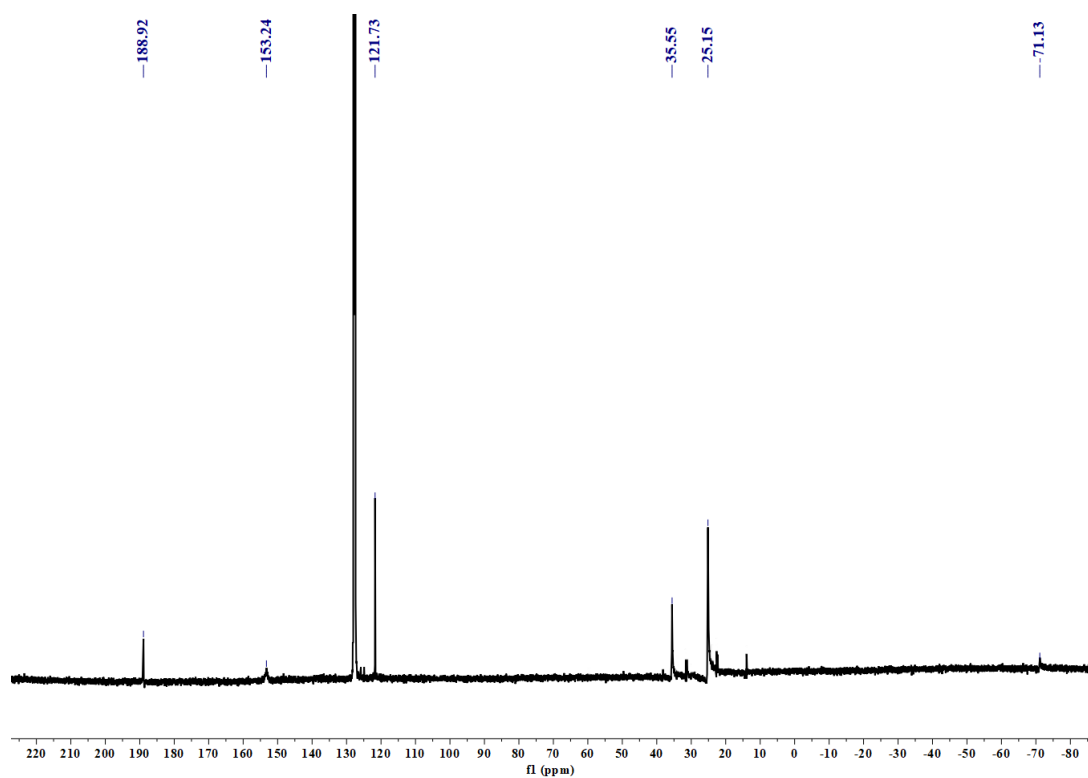

**Figure S15.**  $^{13}\text{C}$   $\{^1\text{H}\}$  NMR spectrum (125 MHz) of  $[(\text{Cp}^{\text{Ar5}})_2\text{Sm}^{\text{II}}]$  (**5**) in  $\text{C}_6\text{D}_6$  at 25 °C.

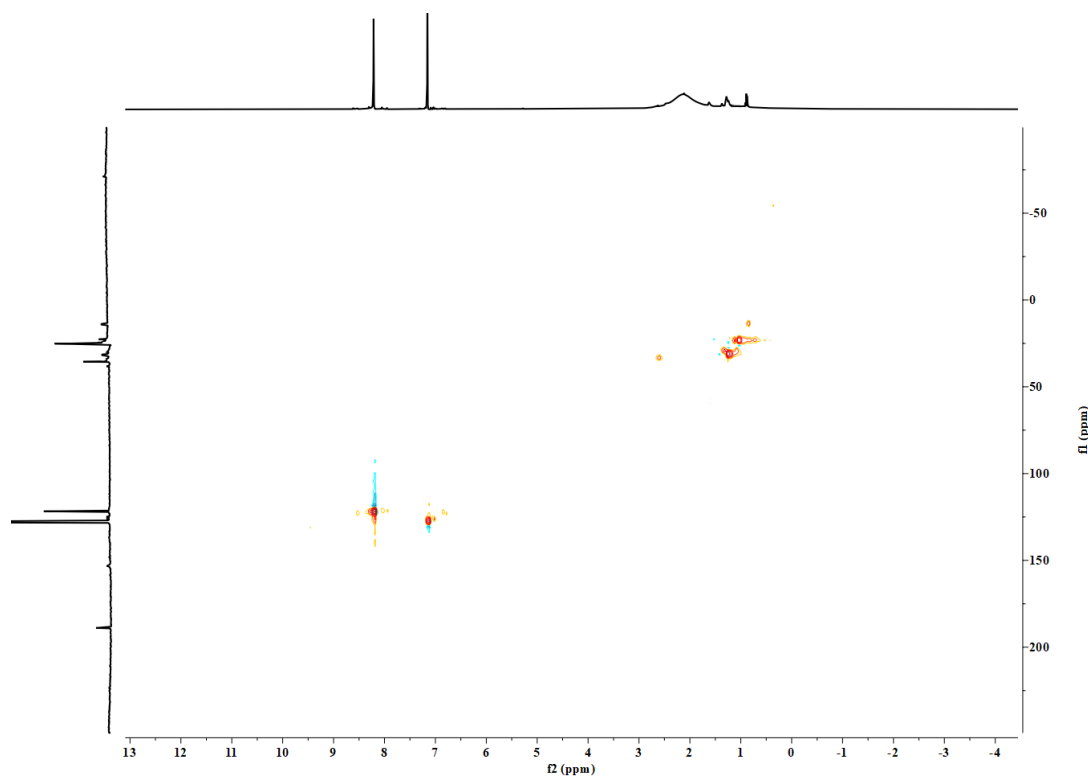

**Figure S16.**  $^1\text{H}$ - $^{13}\text{C}$  HSQC NMR spectrum (500 MHz) of  $[(\text{Cp}^{\text{Ar5}})_2\text{Sm}^{\text{II}}]$  (**5**) in  $\text{C}_6\text{D}_6$  at 25 °C.

**Synthesis of  $[(\text{Cp}^{\text{Ar5}})\text{Sm}^{\text{III}}(\mu\text{-Se})(\text{DABCO})]_2$  (**6**)**

To a stirring solution of  $[(\text{Cp}^{\text{Ar5}})\text{Sm}^{\text{II}}(\mu\text{-H})(\text{DABCO})]_2$  (**4**) (85 mg, 0.038 mmol) in benzene (5 mL) was added powdery Se (6.3 mg, 0.08 mmol) at room temperature. After 2 h, the solution was filtered and all volatiles of the filtrate were removed under reduced pressure to give complex **6** (70 mg, 0.029 mmol, 77 % yield) as pale-brown powder. Single crystals of complex **6** • (0.5 x Hexane) suitable for X-ray analysis were grown from volatilization of a concentrated hexane/benzene solution at room temperature as pale-brown crystals.

$^1\text{H}$  NMR (500 MHz,  $\text{C}_6\text{D}_6$ , 25 °C):  $\delta$  = 3.07 (br, 60H,  $\text{CH}(\text{CH}_3)_2$ ), 5.12 (br, 10H,  $\text{CH}(\text{CH}_3)_2$ ), 8.21 (br, 5H, aryl), 13.06 (br, 10H, aryl) ppm.  $^{13}\text{C}$   $\{^1\text{H}\}$  NMR (125 MHz,  $\text{C}_6\text{D}_6$ , 25 °C):  $\delta$  = 24.89 (s,  $\text{CH}(\text{CH}_3)_2$ ), 34.15 (s,  $\text{CH}(\text{CH}_3)_2$ ), 121.48, 151.75 ppm. Detailed identification of the signals could not be performed due to paramagnetism of samarium(III). Anal. calcd. for (**6**)  $\text{C}_{142}\text{H}_{194}\text{N}_4\text{Se}_2\text{Sm}_2$  (2415.62): C, 70.60; H, 8.09; N, 2.32; found: C, 70.72; H, 8.14; N, 2.30. IR: 3488 (br), 2954 (s), 2867 (s), 1776 (w), 1590 (s), 1461 (s), 1270 (m), 1187 (m), 1139 (m), 1100 (m), 1053 (m), 1000 (m), 964 (m), 932 (w), 868 (s), 826 (m), 770 (s), 708 (s), 660 (m), 604 (m), 547 (m), 508 (s)  $\text{cm}^{-1}$ .

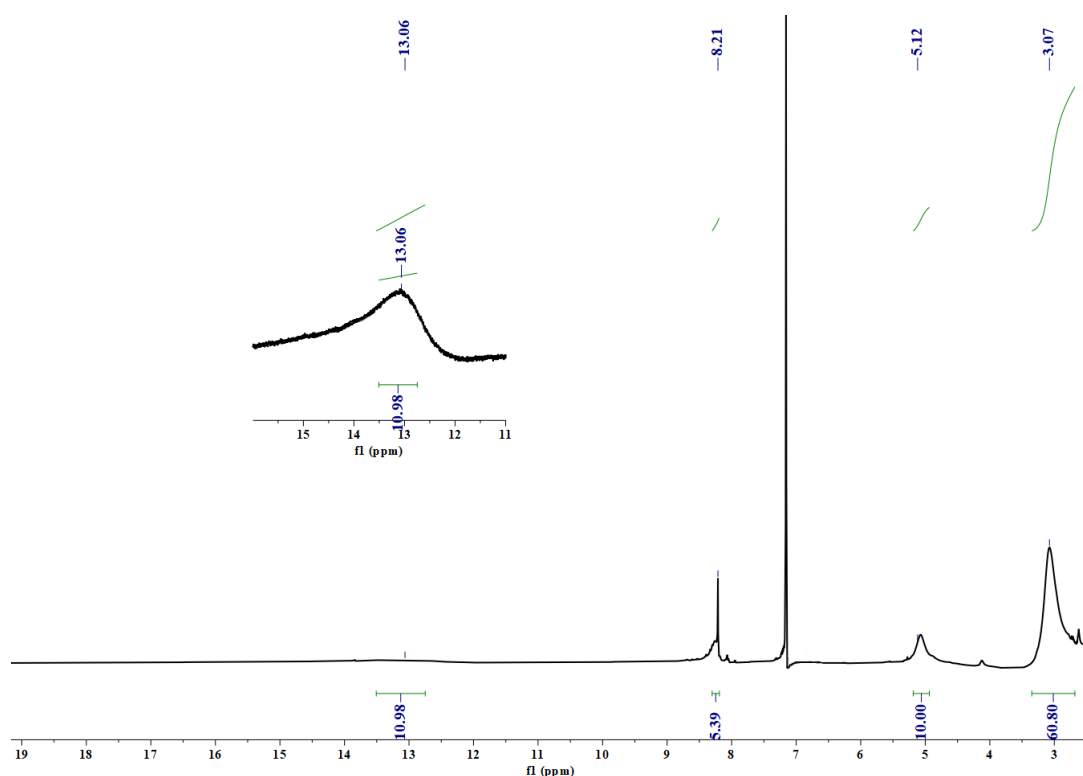

**Figure S17.**  $^1\text{H}$  NMR spectrum (500 MHz) of  $[(\text{Cp}^{\text{Ar5}})\text{Sm}^{\text{III}}(\mu\text{-Se})(\text{DABCO})]_2$  (**6**) in  $\text{C}_6\text{D}_6$  at 25 °C.

# SUPPORTING INFORMATION

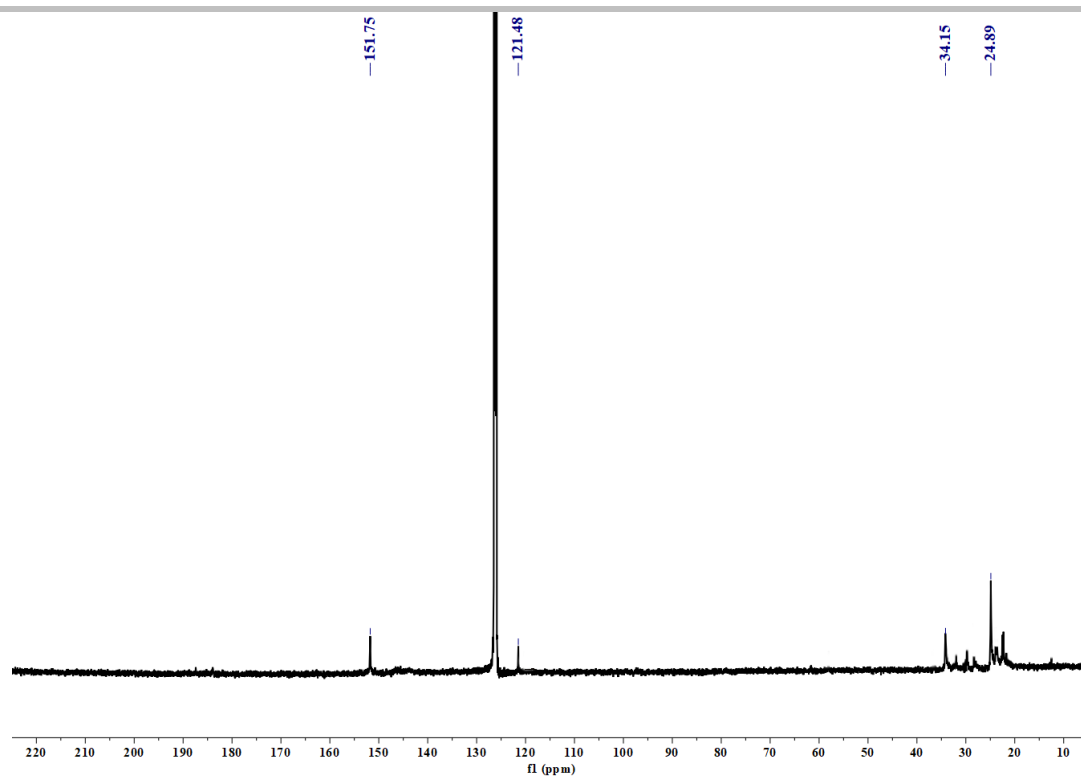

**Figure S18.**  $^{13}\text{C}$   $\{^1\text{H}\}$  NMR spectrum (125 MHz) of  $[(\text{Cp}^{\text{Ar5}})\text{Sm}^{\text{III}}(\mu\text{-Se})(\text{DABCO})]_2$  (**6**) in  $\text{C}_6\text{D}_6$  at  $25^\circ\text{C}$ .

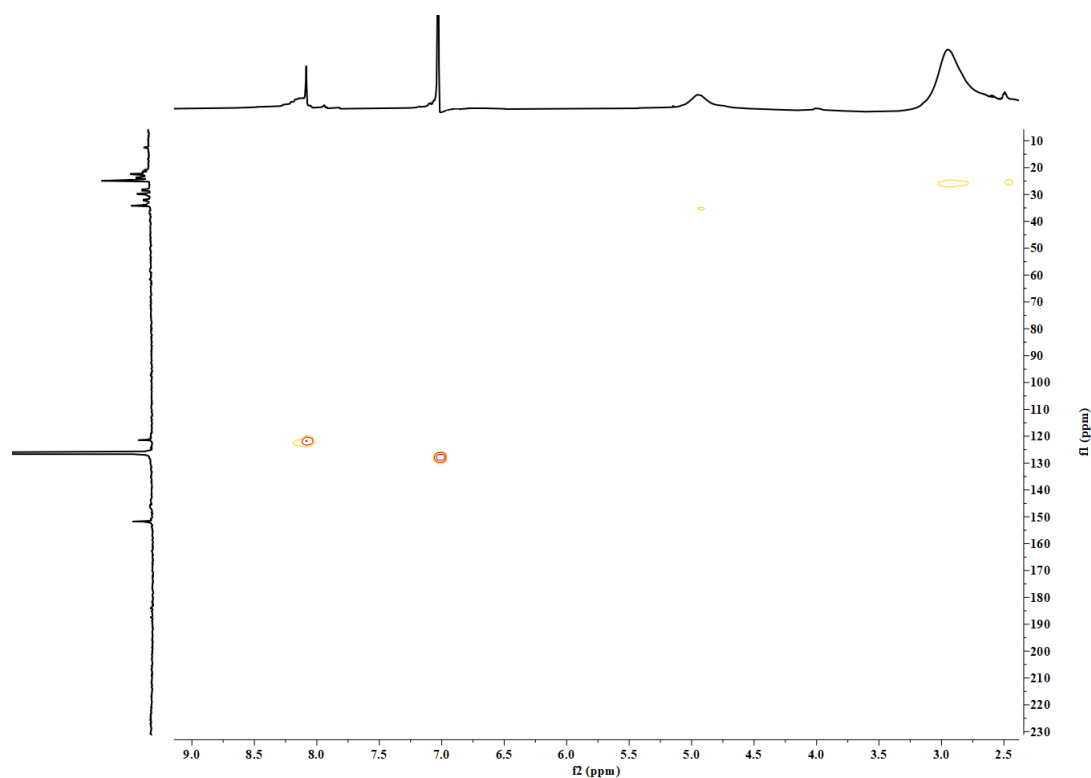

**Figure S19.**  $^1\text{H}$ - $^{13}\text{C}$  HSQC NMR spectrum (500 MHz) of  $[(\text{Cp}^{\text{Ar5}})\text{Sm}^{\text{III}}(\mu\text{-Se})(\text{DABCO})]_2$  (**6**) in  $\text{C}_6\text{D}_6$  at  $25^\circ\text{C}$ .



**Synthesis of  $[(\text{Cp}^{\text{Ar5}})\text{Sm}^{\text{III}}(\mu\text{-PhN-NPh})_2]$  (**7**)**

To a stirring solution of  $[(\text{Cp}^{\text{Ar5}})\text{Sm}^{\text{II}}(\mu\text{-H})(\text{DABCO})]_2$  (**4**) (110 mg, 0.049 mmol) in benzene (5 mL) was added azobenzene (16 mg, 0.098 mmol) at room temperature. Upon addition the solution immediately turned red-brown. After 2 h, the solution was filtered and all volatiles of the filtrate were removed under reduced pressure to give complex **7** (104 mg, 0.043 mmol, 89% yield) as red-brown powder. Single crystals of complex **7** suitable for X-ray analysis were grown from volatilization of a concentrated hexane/benzene solution at room temperature as red-brown crystals.

$^1\text{H}$  NMR (500 MHz,  $\text{C}_6\text{D}_6$ , 25 °C):  $\delta$  = -1.96 (br, 2H, Ph), 0.79 (br, 60H,  $\text{CH}(\text{CH}_3)_2$ ), 1.93 (br, 10H,  $\text{CH}(\text{CH}_3)_2$ ), 3.50 (br, 2H, Ph), 6.54 (t, 2H, Ph), 13.05 (br, 2H, Ph) ppm.  $^{13}\text{C}\{^1\text{H}\}$  NMR (125 MHz,  $\text{C}_6\text{D}_6$ , 25 °C):  $\delta$  = 23.59 (s,  $\text{CH}(\text{CH}_3)_2$ ), 29.85, 33.26 (s,  $\text{CH}(\text{CH}_3)_2$ ), 112.97, 120.73, 126.48, 128.22, 148.30, 151.87 ppm. Detailed identification of the signals could not be performed due to paramagnetism of samarium(III). Anal. calcd. for (**7**)  $\text{C}_{154}\text{H}_{190}\text{N}_4\text{Sm}_2$  (2397.78): C, 77.14; H, 7.99; N, 2.34; found: C, 77.31; H, 8.12; N, 2.29. IR: 3437 (br), 2957 (s), 2871 (s), 1595 (s), 1465 (s), 1378 (m), 1361 (m), 1306 (m), 1250 (m), 1098 (s), 1033 (m), 920 (m), 872 (s), 753 (m), 707 (m), 642 (w), 518 (w)  $\text{cm}^{-1}$ .

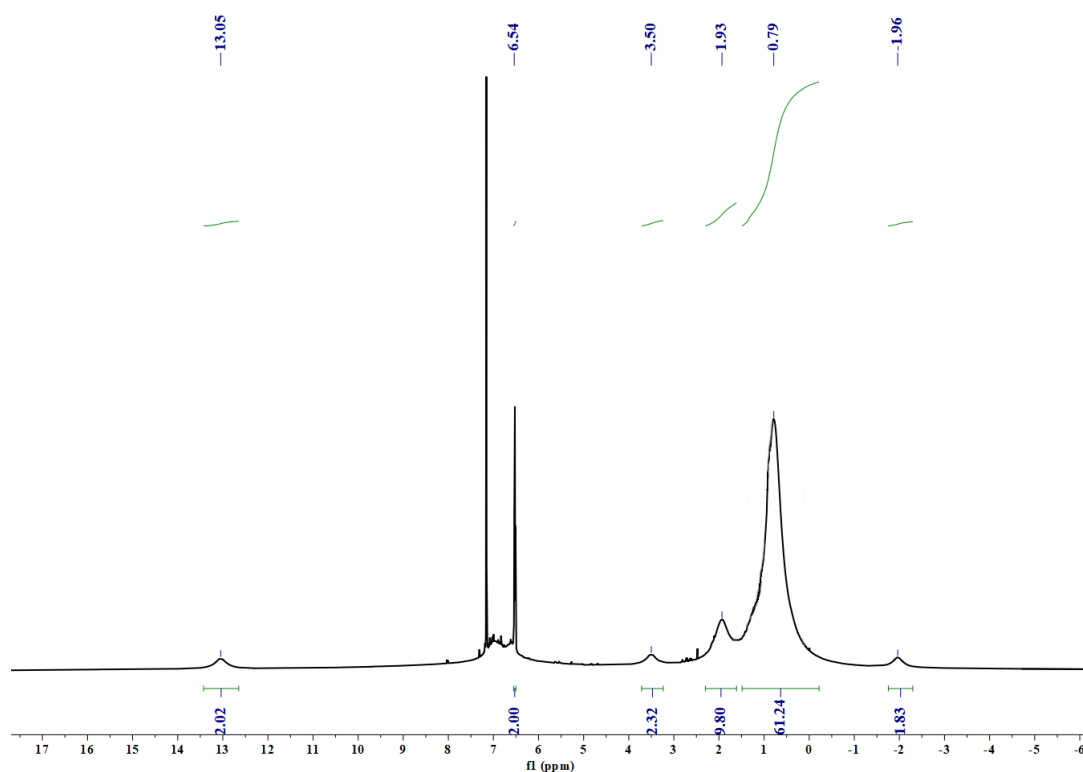

**Figure S20.**  $^1\text{H}$  NMR spectrum (500 MHz) of  $[(\text{Cp}^{\text{Ar5}})\text{Sm}^{\text{III}}(\mu\text{-PhN-NPh})_2]$  (**7**) in  $\text{C}_6\text{D}_6$  at 25 °C.

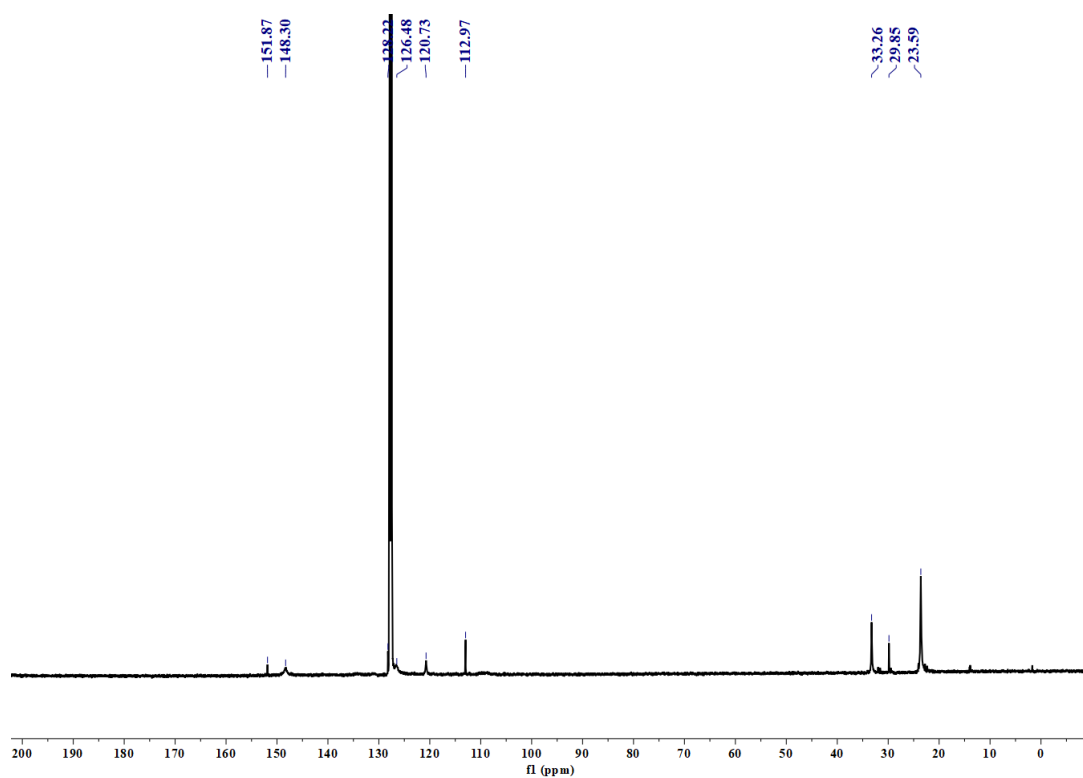

**Figure S21.**  $^{13}\text{C}\{^1\text{H}\}$  NMR spectrum (125 MHz) of  $[(\text{Cp}^{\text{Ar5}})\text{Sm}^{\text{III}}(\mu\text{-PhN-NPh})]_2$  (**7**) in  $\text{C}_6\text{D}_6$  at 25 °C.

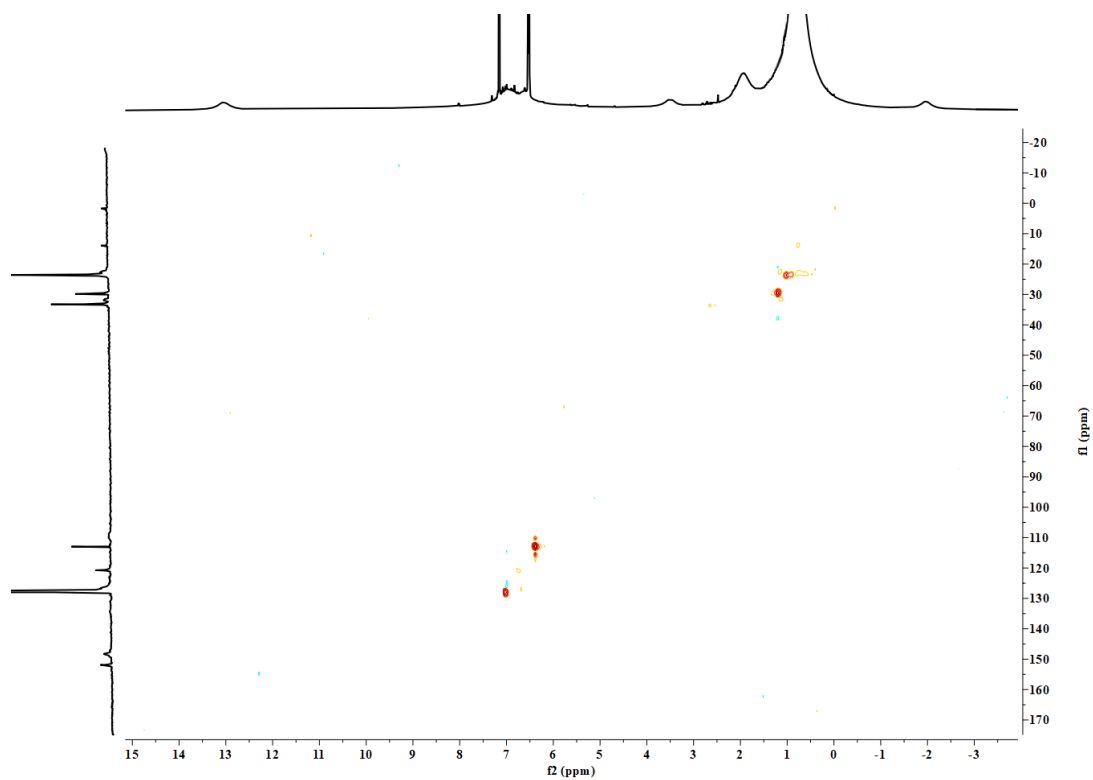

**Figure S22.**  $^1\text{H}$ - $^{13}\text{C}$  HSQC NMR spectrum (500 MHz) of  $[(\text{Cp}^{\text{Ar5}})\text{Sm}^{\text{III}}(\mu\text{-PhN-NPh})]_2$  (**7**) in  $\text{C}_6\text{D}_6$  at 25 °C.

**Synthesis of  $[(\text{Cp}^{\text{Ar5}})\text{Sm}^{\text{III}}(\mu\text{-}\eta^2\text{:}\eta^1\text{-O}_2\text{CH})(\mu\text{-}\eta^2\text{:}\eta^2\text{-CO}_3)(\mu\text{-}\eta^1\text{:}\eta^1\text{-O}_2\text{CH})\text{Sm}^{\text{III}}(\text{Cp}^{\text{Ar5}})(\text{DABCO})]$  (**8**)**

A solution of  $[(\text{Cp}^{\text{Ar5}})\text{Sm}^{\text{II}}(\mu\text{-H})(\text{DABCO})]_2$  (**4**) (100 mg, 0.044 mmol) in toluene (2 mL) was charged into J. Young valve NMR tube. The tube was frozen in liquid nitrogen, evacuated and backfilled with  $\text{CO}_2$  (1 atm). Warmed up to room temperature, the solution changed from dark-brown to pale-yellow after 30 minutes. The resulting solution was added dropwise with pentane (2 mL) and slowly volatilized at room temperature overnight to give complex **8** (76 mg, 0.033 mmol, 75 % yield) as pale-yellow crystals. Single crystals of complex **8**•(0.5 x Benzene) suitable for X-ray analysis were grown from benzene/pentane solution at room temperature.

$^1\text{H}$  NMR (500 MHz,  $\text{C}_6\text{D}_6$ , 25 °C):  $\delta$  = 0.78 (br, 60H,  $\text{CH}(\text{CH}_3)_2$ ), 2.30 (sept, 10H,  $\text{CH}(\text{CH}_3)_2$ ), 6.56 (br, 5H, aryl) ppm.  $^{13}\text{C}\{^1\text{H}\}$  NMR (125 MHz,  $\text{C}_6\text{D}_6$ , 25 °C):  $\delta$  = 23.82 (s,  $\text{CH}(\text{CH}_3)_2$ ), 33.91 (s,  $\text{CH}(\text{CH}_3)_2$ ), 44.87, 121.96, 126.65, 128.21, 141.06, 147.70 ppm. Detailed identification of the signals could not be performed due to paramagnetism of samarium(III). Anal. calcd. for (**8**)  $\text{C}_{139}\text{H}_{184}\text{N}_2\text{O}_7\text{Sm}_2$  (2295.57): C, 72.72; H, 8.08; N, 1.22; found: C, 72.88; H, 8.21; N, 1.25. IR: 3482 (br), 2957 (s), 2871 (s), 2589 (w), 1761 (w), 1590 (s), 1463 (s), 1366 (s), 1331 (m), 1186 (w), 1060 (m), 918 (m), 871 (s), 825 (w), 777 (w), 711 (s), 678 (w), 593 (m)  $\text{cm}^{-1}$ .

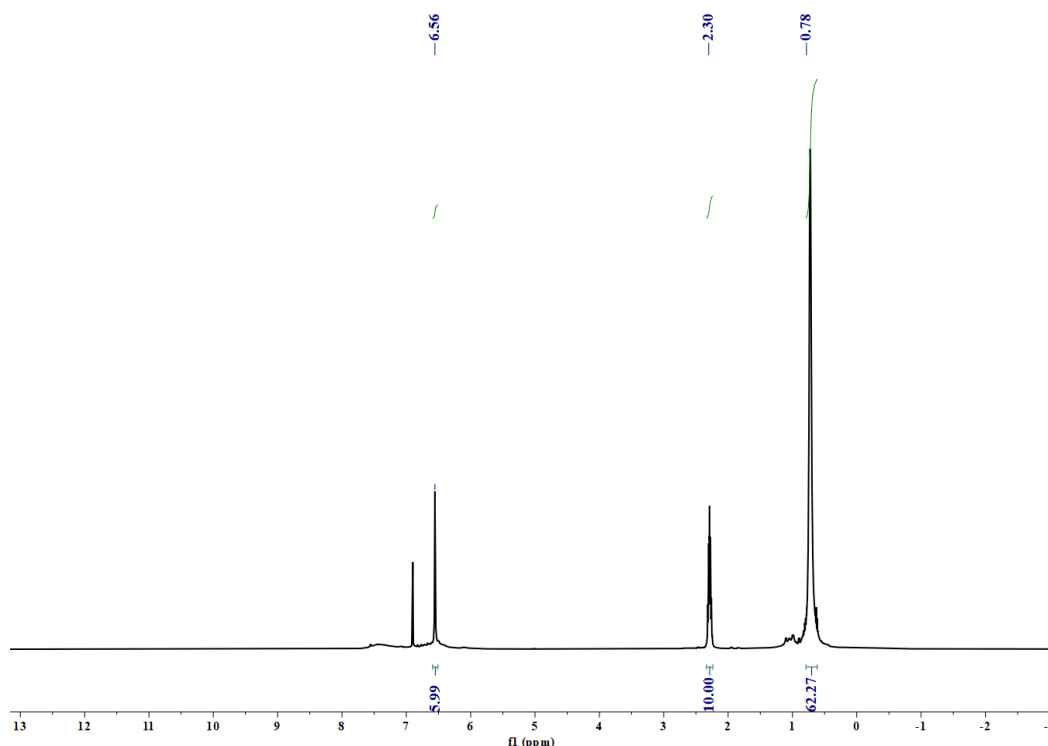

**Figure S23.**  $^1\text{H}$  NMR spectrum (500 MHz) of  $[(\text{Cp}^{\text{Ar5}})\text{Sm}^{\text{III}}(\mu\text{-}\eta^2\text{:}\eta^1\text{-O}_2\text{CH})(\mu\text{-}\eta^2\text{:}\eta^2\text{-CO}_3)(\mu\text{-}\eta^1\text{:}\eta^1\text{-O}_2\text{CH})\text{Sm}^{\text{III}}(\text{Cp}^{\text{Ar5}})(\text{DABCO})]$  (**8**) in  $\text{C}_6\text{D}_6$  at 25 °C.

# SUPPORTING INFORMATION

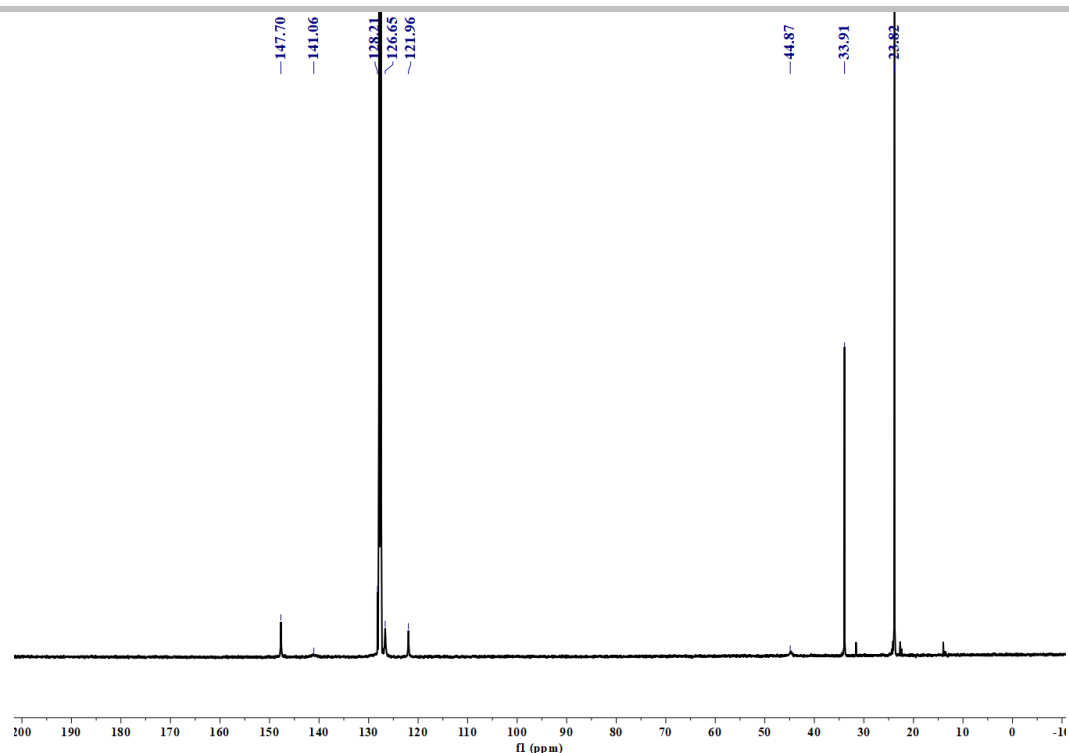

**Figure S24.**  $^{13}\text{C}$   $\{^1\text{H}\}$  NMR spectrum (125 MHz) of  $[(\text{Cp}^{\text{Ar5}})\text{Sm}^{\text{III}}(\mu\text{-}\eta^2\text{:}\eta^1\text{-O}_2\text{CH})(\mu\text{-}\eta^2\text{:}\eta^2\text{-CO}_3)(\mu\text{-}\eta^1\text{:}\eta^1\text{-O}_2\text{CH})\text{Sm}^{\text{III}}(\text{Cp}^{\text{Ar5}})(\text{DABCO})]$  (**8**) in  $\text{C}_6\text{D}_6$  at  $25\text{ }^\circ\text{C}$ .

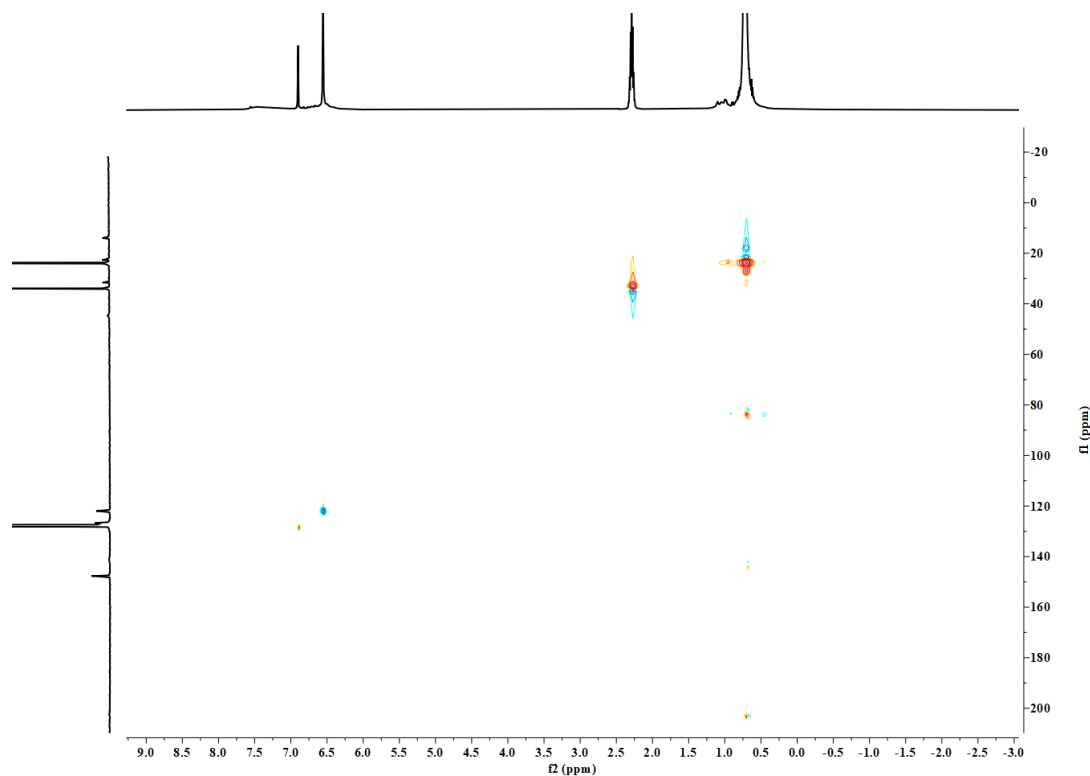

**Figure S25.**  $^1\text{H}$ - $^{13}\text{C}$  HSQC NMR spectrum (500 MHz) of  $[(\text{Cp}^{\text{Ar5}})\text{Sm}^{\text{III}}(\mu\text{-}\eta^2\text{:}\eta^1\text{-O}_2\text{CH})(\mu\text{-}\eta^2\text{:}\eta^2\text{-CO}_3)(\mu\text{-}\eta^1\text{:}\eta^1\text{-O}_2\text{CH})\text{Sm}^{\text{III}}(\text{Cp}^{\text{Ar5}})(\text{DABCO})]$  (**8**) in  $\text{C}_6\text{D}_6$  at  $25\text{ }^\circ\text{C}$ .

**Synthesis of  $[(\text{Cp}^{\text{Ar5}})\text{Sm}^{\text{III}}(\mu\text{-}\eta^2\text{:}\eta^2\text{-CS}_3)(\text{DABCO})]_2$  (**9**)**

To a stirring solution of  $[(\text{Cp}^{\text{Ar5}})\text{Sm}^{\text{II}}(\mu\text{-H})(\text{DABCO})]_2$  (**4**) (88 mg, 0.039 mmol) in toluene (5 mL) was added carbon disulfide (18 mg, 0.234 mmol) at  $-30$  °C. Upon addition the solution immediately turned red-brown. The reaction mixture was warmed to room temperature and stirred for 30 minutes, then filtered. The filtrate was concentrated to 1 mL, layered with 3 mL hexane, and kept at  $-30$  °C to give complex **9** (40 mg, 0.016 mmol, 41 % yield) as red-brown powder. Single crystals of complex **9**•(Benzene) suitable for X-ray analysis were grown from volatilization of a concentrated benzene/hexane solution at room temperature as red-brown crystals.

$^1\text{H}$  NMR (500 MHz,  $\text{C}_6\text{D}_6$ , 25 °C):  $\delta$  = 1.08 (br, 60H,  $\text{CH}(\text{CH}_3)_2$ ), 2.52, 2.72, 6.78 (br, 5H, aryl) ppm.  $^{13}\text{C}$   $\{^1\text{H}\}$  NMR (125 MHz,  $\text{C}_6\text{D}_6$ , 25 °C):  $\delta$  = 24.25 (s,  $\text{CH}(\text{CH}_3)_2$ ), 34.22 (s,  $\text{CH}(\text{CH}_3)_2$ ), 121.13, 146.24, 156.72 ppm. Detailed identification of the signals could not be performed due to paramagnetism of samarium(III). Anal. calcd. for (**9**)  $\text{C}_{144}\text{H}_{194}\text{N}_4\text{S}_6\text{Sm}_2$  (2474.08): C, 69.90; H, 7.90; N, 2.26; found: C, 69.79; H, 7.77; N, 2.32. IR: 3440 (br), 2956 (s), 2931 (s), 2871 (s), 1765 (w), 1595 (s), 1462 (s), 1379 (m), 1361 (m), 1302 (m), 1259 (s), 1101 (s), 943 (m), 872 (m), 711 (m), 643 (w), 593 (m)  $\text{cm}^{-1}$ .

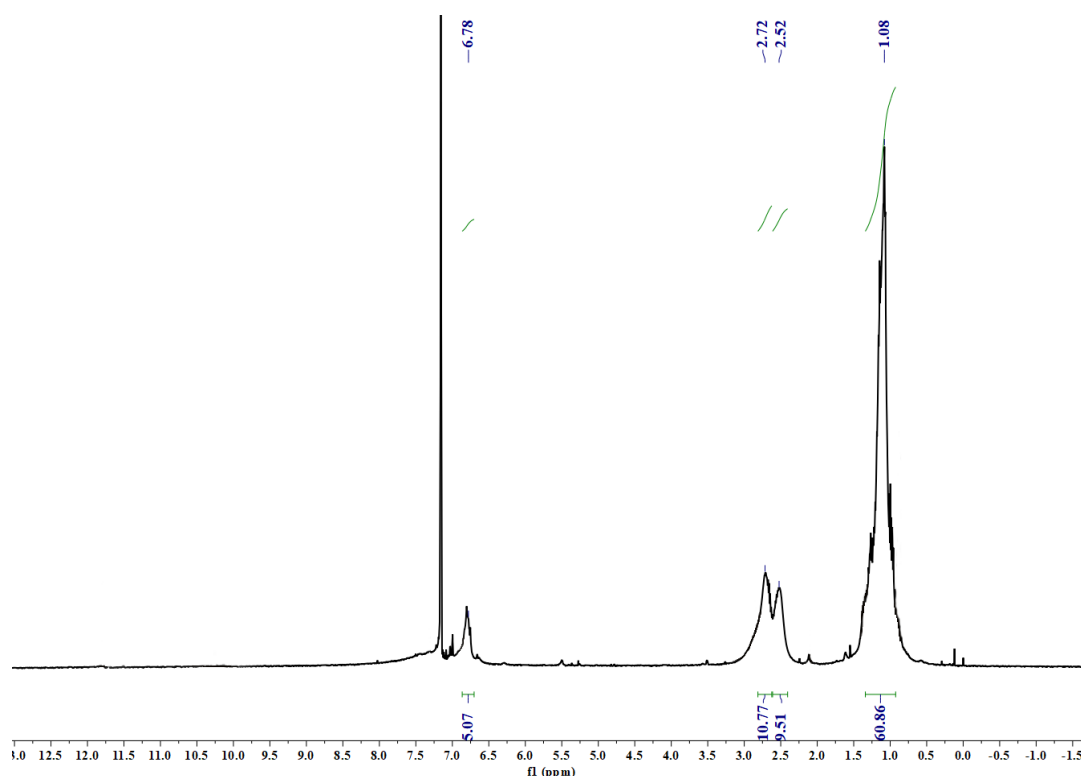

**Figure S26.**  $^1\text{H}$  NMR spectrum (500 MHz) of  $[(\text{Cp}^{\text{Ar5}})\text{Sm}^{\text{III}}(\mu\text{-}\eta^2\text{:}\eta^2\text{-CS}_3)(\text{DABCO})]_2$  (**9**) in  $\text{C}_6\text{D}_6$  at 25 °C.

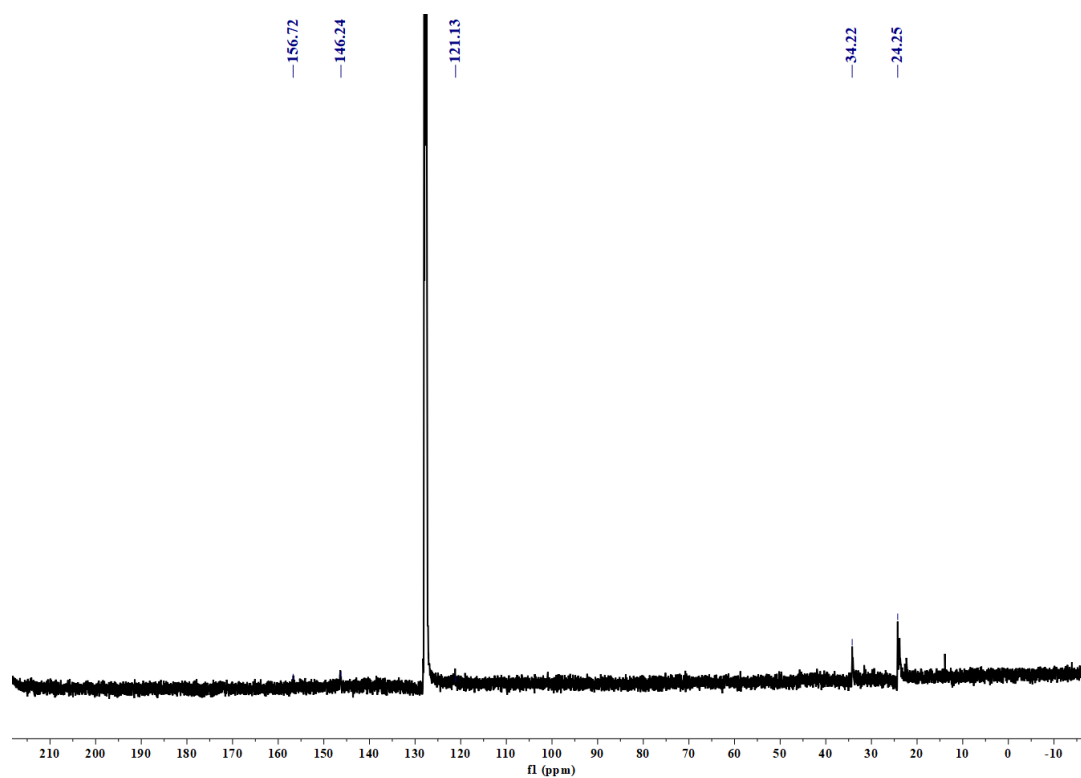

**Figure S27.**  $^{13}\text{C}\{^1\text{H}\}$  NMR spectrum (125 MHz) of  $[(\text{Cp}^{\text{Ar5}})\text{Sm}^{\text{III}}(\mu\text{-}\eta^2\text{:}\eta^2\text{-CS}_3)(\text{DABCO})]_2$  (**9**) in  $\text{C}_6\text{D}_6$  at 25 °C.

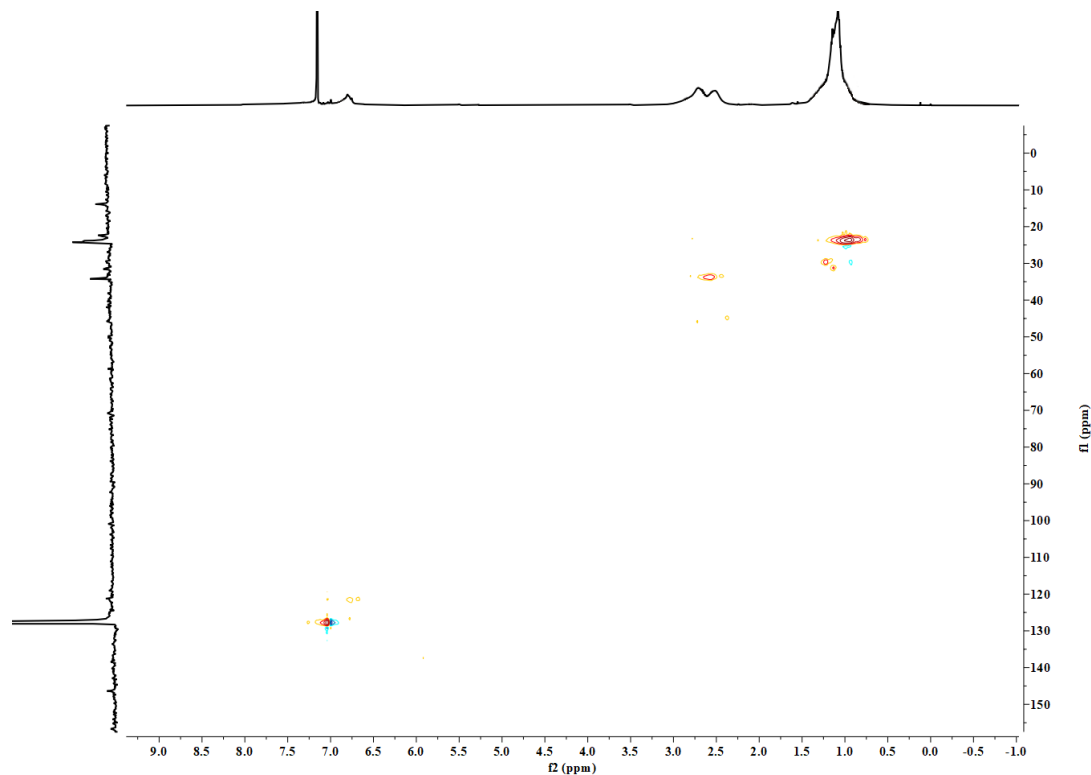

**Figure S28.**  $^1\text{H}$ - $^{13}\text{C}$  HSQC NMR spectrum (500 MHz) of  $[(\text{Cp}^{\text{Ar5}})\text{Sm}^{\text{III}}(\mu\text{-}\eta^2\text{:}\eta^2\text{-CS}_3)(\text{DABCO})]_2$  (**9**) in  $\text{C}_6\text{D}_6$  at 25 °C.

## X-ray Crystallographic Studies

Single crystals suitable for X-ray analysis were obtained as described in the preparation. The crystals were manipulated in the glovebox under a microscope in the glovebox, Data collection was performed at -80 °C on D8 Venture diffractometer with a CCD area detector, using graphite monochromated Mo  $K_{\alpha}$  radiation ( $\lambda = 0.71073 \text{ \AA}$ ). The determination of the crystal class and unit cell parameters was carried out by the SMART program packages.<sup>[4]</sup> The raw frame data were processed using SAINT<sup>[5]</sup> and absorption corrections using SADABS<sup>[6]</sup> to yield the reflection data file. The structures were solved by using SHELXS-2018,<sup>[7]</sup> SUPERFLIP<sup>[8,9]</sup> in the WinGX program package.<sup>[10]</sup> Refinements were performed on  $F^2$  anisotropically for all the non-hydrogen atoms by the full-matrix least-squares method using SHELXL-2018 program.<sup>[7]</sup>

Refinement of **2**: The SQUEEZE<sup>[11]</sup> routine of the program PLATON<sup>[12]</sup> was implemented to remove the contributions of one disordered hexane to the observed structure factors. Five *i*Pr groups were disordered. C23~C25 and C23'~C25' disordered over two sites with occupancies 0.503:0.497. C35~C37 and C35'~C37' disordered over two sites with occupancies 0.544:0.456. C54~C56 and C54'~C56' disordered over two sites with occupancies 0.515:0.485. C59~C61 and C59'~C61' disordered over two sites with occupancies 0.495:0.505. C66~C68 and C66'~C68' disordered over two sites with occupancies 0.609:0.391.

Refinement of **4**: The SQUEEZE<sup>[11]</sup> routine of the program PLATON<sup>[12]</sup> was implemented to remove the contributions of one disordered DABCO to the observed structure factors. The terminal hydride (H1) was located by difference Fourier syntheses and refined. Two *i*Pr groups were disordered. C36~C38 and C36'~C38' disordered over two sites with occupancies 0.391:0.609. C55~C57 and C55'~C57' disordered over two sites with occupancies 0.570:0.430.

Refinement of **5**: Two *i*Pr groups were disordered. C23~C25 and C36'~C38' disordered over two sites with occupancies 0.451:0.549. C59~C61 and C59'~C61' disordered over two sites with occupancies 0.578:0.422.

Refinement of **6**: The SQUEEZE<sup>[11]</sup> routine of the program PLATON<sup>[12]</sup> was implemented to remove the contributions of half a disordered hexane to the observed structure factors. One *i*Pr groups were disordered. C45~C47 and C45'~C47' disordered over two sites with occupancies 0.593:0.407.

## SUPPORTING INFORMATION

Refinement of **7**: Three  $i$ Pr groups were disordered. C28~C30 and C28'~C30' disordered over two sites with occupancies 0.431:0.569. C64~C66 and C64'~C66' disordered over two sites with occupancies 0.656:0.344. C76~C78 and C76'~C78' disordered over two sites with occupancies 0.422:0.578.

Refinement of **8**: The SQUEEZE<sup>[11]</sup> routine of the program PLATON<sup>[12]</sup> was implemented to remove the contributions of half a disordered benzene to the observed structure factors. The hydrogen atoms (H2 and H3) of formate ligands were located by difference Fourier syntheses and refined. C1, C2, O3 and C1', C2', O3' disordered over two sites with occupancies 0.631:0.369. Ten  $i$ Pr groups were disordered. C52~C54 and C52'~C54' disordered over two sites with occupancies 0.629:0.371. C57~C59 and C57'~C59' disordered over two sites with occupancies 0.464:0.536. C76~C78 and C76'~C78' disordered over two sites with occupancies 0.408:0.592. C81~C83 and C81'~C83' disordered over two sites with occupancies 0.348:0.652. C98~C100 and C198~C200 disordered over two sites with occupancies 0.588:0.412. C110~C112 and C210~C212 disordered over two sites with occupancies 0.678:0.322. C117~C119 and C217~C219 disordered over two sites with occupancies 0.685:0.315. C129~C131 and C229~C231 disordered over two sites with occupancies 0.331:0.669. C134~C136 and C234~C236 disordered over two sites with occupancies 0.516:0.484. C141~C143 and C241~C243 disordered over two sites with occupancies 0.547:0.453.

Refinement of **9**: The SQUEEZE<sup>[11]</sup> routine of the program PLATON<sup>[12]</sup> was implemented to remove the contributions of one disordered benzene to the observed structure factors. Three  $i$ Pr groups were disordered. C18~C20 and C18'~C20' disordered over two sites with occupancies 0.657:0.343. C30~C32 and C30'~C32' disordered over two sites with occupancies 0.432:0.568. C42~C44 and C42'~C44' disordered over two sites with occupancies 0.512:0.488.

Other hydrogen atoms were placed at the calculated positions and were included in the structure calculation without further refinement of the parameters. The residual electron densities were of no chemical significance. Crystal data and analysis results are listed in Table **S1-7**.

CCDC number 2104460 (**2**), 2104461 (**4**), 2104462 (**5**), 2104463 (**6**), 2104464 (**7**), 2104465 (**8**), 2104466 (**9**) contain the supplementary crystallographic data for this paper. Copies of the data can be obtained free of charge on application to CCDC, 12 Union Road, Cambridge CB21EZ, UK (fax: (+44)1223-336-033; E-mail: [deposit@ccdc.cam.ac.uk](mailto:deposit@ccdc.cam.ac.uk)).



**Table S1.** Crystal data and structure refinement for complex **2**

|                                   |                                                                                           |
|-----------------------------------|-------------------------------------------------------------------------------------------|
| Identification code               | <b>2</b>                                                                                  |
| CCDC number                       | 2104460                                                                                   |
| Empirical formula                 | C <sub>142</sub> H <sub>194</sub> I <sub>2</sub> N <sub>4</sub> Sm <sub>2</sub> •(Hexane) |
| Formula weight                    | 2511.50                                                                                   |
| Temperature                       | 193(2) K                                                                                  |
| Wavelength                        | 0.71073 Å                                                                                 |
| Crystal system, space group       | Trigonal, P-3c1                                                                           |
| a                                 | 31.3935(5) Å                                                                              |
| b                                 | 31.3935(5) Å                                                                              |
| c                                 | 27.5926(6) Å                                                                              |
| α                                 | 90 °                                                                                      |
| β                                 | 90 °                                                                                      |
| γ                                 | 120 °                                                                                     |
| Volume                            | 23550.6(9) Å <sup>3</sup>                                                                 |
| Z, Calculated density             | 6, 1.063 Mg/m <sup>3</sup>                                                                |
| Absorption coefficient            | 1.174 mm <sup>-1</sup>                                                                    |
| F(000)                            | 7824                                                                                      |
| Crystal size                      | 0.210 x 0.160 x 0.130 mm                                                                  |
| Theta range for data collection   | 1.965 to 24.999 °                                                                         |
| Limiting indices                  | -37<=h<=37, -37<=k<=37, -32<=l<=32                                                        |
| Reflections collected / unique    | 231000 / 13704 [R(int) = 0.0562]                                                          |
| Completeness to theta             | (24.999) 98.9 %                                                                           |
| Absorption correction             | Empirical                                                                                 |
| Max. and min. transmission        | 0.858 and 0.798                                                                           |
| Refinement method                 | Full-matrix least-squares on F <sup>2</sup>                                               |
| Data / restraints / parameters    | 13704 / 27 / 655                                                                          |
| Goodness-of-fit on F <sup>2</sup> | 1.058                                                                                     |
| Final R indices [I>2sigma(I)]     | R1 = 0.0597, wR2 = 0.1712                                                                 |
| R indices (all data)              | R1 = 0.0737, wR2 = 0.1884                                                                 |
| Largest diff. peak and hole       | 2.030 and -4.314 e. Å <sup>-3</sup>                                                       |

**Table S2.** Crystal data and structure refinement for complex **4**

|                                              |                                                                           |
|----------------------------------------------|---------------------------------------------------------------------------|
| Identification code                          | <b>4</b>                                                                  |
| CCDC number                                  | 2104461                                                                   |
| Empirical formula                            | C <sub>142</sub> H <sub>196</sub> N <sub>4</sub> Sm <sub>2</sub> •(DABCO) |
| Formula weight                               | 2259.72                                                                   |
| Temperature                                  | 173(2) K                                                                  |
| Wavelength                                   | 0.71073 Å                                                                 |
| Crystal system, space group                  | Monoclinic, <i>P</i> 2 <sub>1</sub> / <i>n</i>                            |
| <i>a</i>                                     | 16.4155 (11) Å                                                            |
| <i>b</i>                                     | 25.5172 (16) Å                                                            |
| <i>c</i>                                     | 17.9798 (12) Å                                                            |
| $\alpha$                                     | 90 °                                                                      |
| $\beta$                                      | 116.305 (1) °                                                             |
| $\gamma$                                     | 90 °                                                                      |
| Volume                                       | 6751.4(8) Å <sup>3</sup>                                                  |
| Z, Calculated density                        | 2, 1.112 Mg/m <sup>3</sup>                                                |
| Absorption coefficient                       | 0.907 mm <sup>-1</sup>                                                    |
| F(000)                                       | 2400                                                                      |
| Crystal size                                 | 0.230 x 0.150 x 0.130 mm                                                  |
| Theta range for data collection              | 1.494 to 24.999 °                                                         |
| Limiting indices                             | -19 ≤ <i>h</i> ≤ 16, -29 ≤ <i>k</i> ≤ 30, -17 ≤ <i>l</i> ≤ 21             |
| Reflections collected / unique               | 34433 / 11837 [R(int) = 0.0727]                                           |
| Completeness to theta                        | (24.999 °) 99.4 %                                                         |
| Absorption correction                        | Empirical                                                                 |
| Max. and min. transmission                   | 0.889 and 0.849                                                           |
| Refinement method                            | Full-matrix least-squares on F <sup>2</sup>                               |
| Data / restraints / parameters               | 11837 / 12 / 673                                                          |
| Goodness-of-fit on F <sup>2</sup>            | 0.973                                                                     |
| Final R indices [ <i>I</i> > 2σ( <i>I</i> )] | R1 = 0.0524, wR2 = 0.1117                                                 |
| R indices (all data)                         | R1 = 0.0924, wR2 = 0.1271                                                 |
| Largest diff. peak and hole                  | 1.033 and -0.585 e. Å <sup>-3</sup>                                       |

**Table S3.** Crystal data and structure refinement for complex **5**

|                                   |                                                   |
|-----------------------------------|---------------------------------------------------|
| Identification code               | <b>5</b>                                          |
| CCDC number                       | 2104462                                           |
| Empirical formula                 | C <sub>130</sub> H <sub>170</sub> Sm <sub>1</sub> |
| Formula weight                    | 1883.00                                           |
| Temperature                       | 193(2) K                                          |
| Wavelength                        | 0.71073 Å                                         |
| Crystal system, space group       | Monoclinic, P2(1)/n                               |
| a                                 | 17.1221(9) Å                                      |
| b                                 | 18.2035(10) Å                                     |
| c                                 | 18.4974(11) Å                                     |
| α                                 | 90 °                                              |
| β                                 | 100.735(2) °                                      |
| γ                                 | 90 °                                              |
| Volume                            | 5664.4(5) Å <sup>3</sup>                          |
| Z, Calculated density             | 2, 1.104 Mg/m <sup>3</sup>                        |
| Absorption coefficient            | 0.565 mm <sup>-1</sup>                            |
| F(000)                            | 2024                                              |
| Crystal size                      | 0.180 x 0.140 x 0.110 mm                          |
| Theta range for data collection   | 1.862 to 25.000 °                                 |
| Limiting indices                  | -20 ≤ h ≤ 20, -21 ≤ k ≤ 21, -21 ≤ l ≤ 21          |
| Reflections collected / unique    | 206596 / 9902 [R(int) = 0.0943]                   |
| Completeness to theta             | (25.000) 99.3 %                                   |
| Absorption correction             | Gaussian                                          |
| Max. and min. transmission        | 0.940 and 0.909                                   |
| Refinement method                 | Full-matrix least-squares on F <sup>2</sup>       |
| Data / restraints / parameters    | 9902 / 9 / 574                                    |
| Goodness-of-fit on F <sup>2</sup> | 1.058                                             |
| Final R indices [I > 2σ(I)]       | R1 = 0.0632, wR2 = 0.1441                         |
| R indices (all data)              | R1 = 0.0928, wR2 = 0.1688                         |
| Largest diff. peak and hole       | 1.239 and -2.194 e. Å <sup>-3</sup>               |

**Table S4.** Crystal data and structure refinement for complex **6**

|                                   |                                                              |
|-----------------------------------|--------------------------------------------------------------|
| Identification code               | <b>6</b>                                                     |
| CCDC number                       | 2104463                                                      |
| Empirical formula                 | $C_{142}H_{194}N_4Se_2Sm_2 \cdot (0.5 \times \text{Hexane})$ |
| Formula weight                    | 2415.62                                                      |
| Temperature                       | 193(2) K                                                     |
| Wavelength                        | 0.71073 Å                                                    |
| Crystal system, space group       | Monoclinic, P2(1)/n                                          |
| a                                 | 25.4365(19) Å                                                |
| b                                 | 17.2334(10) Å                                                |
| c                                 | 30.027(2) Å                                                  |
| $\alpha$                          | 90 °                                                         |
| $\beta$                           | 98.082(3) °                                                  |
| $\gamma$                          | 90 °                                                         |
| Volume                            | 13031.7(16) Å <sup>3</sup>                                   |
| Z, Calculated density             | 4, 1.231 Mg/m <sup>3</sup>                                   |
| Absorption coefficient            | 1.499 mm <sup>-1</sup>                                       |
| F(000)                            | 5064                                                         |
| Crystal size                      | 0.180 x 0.120 x 0.080 mm                                     |
| Theta range for data collection   | 2.003 to 25.000 °                                            |
| Limiting indices                  | -30 ≤ h ≤ 30, -20 ≤ k ≤ 20, -35 ≤ l ≤ 35                     |
| Reflections collected / unique    | 263503 / 22885 [R(int) = 0.1189]                             |
| Completeness to theta             | (25.000) 99.7 %                                              |
| Absorption correction             | Empirical                                                    |
| Max. and min. transmission        | 0.887 and 0.806                                              |
| Refinement method                 | Full-matrix least-squares on F <sup>2</sup>                  |
| Data / restraints / parameters    | 22885 / 6 / 1289                                             |
| Goodness-of-fit on F <sup>2</sup> | 1.019                                                        |
| Final R indices [I > 2σ(I)]       | R1 = 0.0507, wR2 = 0.1098                                    |
| R indices (all data)              | R1 = 0.0853, wR2 = 0.1292                                    |
| Largest diff. peak and hole       | 2.524 and -0.986 e. Å <sup>-3</sup>                          |

**Table S5.** Crystal data and structure refinement for complex **7**

|                                   |                                                                |
|-----------------------------------|----------------------------------------------------------------|
| Identification code               | <b>7</b>                                                       |
| CCDC number                       | 2104464                                                        |
| Empirical formula                 | C <sub>77</sub> H <sub>95</sub> N <sub>2</sub> Sm <sub>1</sub> |
| Formula weight                    | 1198.89                                                        |
| Temperature                       | 193(2) K                                                       |
| Wavelength                        | 0.71073 Å                                                      |
| Crystal system, space group       | Triclinic, P-1                                                 |
| a                                 | 14.7083(8) Å                                                   |
| b                                 | 14.9791(8) Å                                                   |
| c                                 | 17.3833(10) Å                                                  |
| $\alpha$                          | 82.778(2)°                                                     |
| $\beta$                           | 75.024(2) °                                                    |
| $\gamma$                          | 62.966(2) °                                                    |
| Volume                            | 3295.4(3) Å <sup>3</sup>                                       |
| Z, Calculated density             | 2, 1.208 Mg/m <sup>3</sup>                                     |
| Absorption coefficient            | 0.934 mm <sup>-1</sup>                                         |
| F(000)                            | 1266                                                           |
| Crystal size                      | 0.190 x 0.140 x 0.110 mm                                       |
| Theta range for data collection   | 2.214 to 24.999 °                                              |
| Limiting indices                  | -17<=h<=17, -17<=k<=17, -20<=l<=20                             |
| Reflections collected / unique    | 90091 / 11551 [R(int) = 0.0563]                                |
| Completeness to theta             | (24.999) 99.5 %                                                |
| Absorption correction             | Empirical                                                      |
| Max. and min. transmission        | 0.902 and 0.855                                                |
| Refinement method                 | Full-matrix least-squares on F <sup>2</sup>                    |
| Data / restraints / parameters    | 11551 / 15 / 715                                               |
| Goodness-of-fit on F <sup>2</sup> | 1.045                                                          |
| Final R indices [I>2sigma(I)]     | R1 = 0.0329, wR2 = 0.0748                                      |
| R indices (all data)              | R1 = 0.0397, wR2 = 0.0789                                      |
| Largest diff. peak and hole       | 0.975 and -0.619 e. Å <sup>-3</sup>                            |

**Table S6.** Crystal data and structure refinement for complex **8**

|                                   |                                                                                                  |
|-----------------------------------|--------------------------------------------------------------------------------------------------|
| Identification code               | <b>8</b>                                                                                         |
| CCDC number                       | 2104465                                                                                          |
| Empirical formula                 | C <sub>139</sub> H <sub>184</sub> N <sub>2</sub> O <sub>7</sub> Sm <sub>2</sub> •(0.5 x Benzene) |
| Formula weight                    | 2295.57                                                                                          |
| Temperature                       | 193(2) K                                                                                         |
| Wavelength                        | 0.71073 Å                                                                                        |
| Crystal system, space group       | Triclinic, P-1                                                                                   |
| a                                 | 14.4270(10) Å                                                                                    |
| b                                 | 14.7683(9) Å                                                                                     |
| c                                 | 34.5942(18) Å                                                                                    |
| α                                 | 88.821(2) °                                                                                      |
| β                                 | 79.946(2) °                                                                                      |
| γ                                 | 63.694(2) °                                                                                      |
| Volume                            | 6492.5(7) Å <sup>3</sup>                                                                         |
| Z, Calculated density             | 2, 1.174 Mg/m <sup>3</sup>                                                                       |
| Absorption coefficient            | 0.948 mm <sup>-1</sup>                                                                           |
| F(000)                            | 2424                                                                                             |
| Crystal size                      | 0.190 x 0.160 x 0.140 mm                                                                         |
| Theta range for data collection   | 2.155 to 24.999 °                                                                                |
| Limiting indices                  | -17<=h<=17, -17<=k<=17, -41<=l<=41                                                               |
| Reflections collected / unique    | 215230 / 22749 [R(int) = 0.0424]                                                                 |
| Completeness to theta             | (24.999) 99.4 %                                                                                  |
| Absorption correction             | Empirical                                                                                        |
| Max. and min. transmission        | 0.876 and 0.835                                                                                  |
| Refinement method                 | Full-matrix least-squares on F <sup>2</sup>                                                      |
| Data / restraints / parameters    | 22749 / 49 / 1344                                                                                |
| Goodness-of-fit on F <sup>2</sup> | 1.038                                                                                            |
| Final R indices [I>2σ(I)]         | R1 = 0.0377, wR2 = 0.0933                                                                        |
| R indices (all data)              | R1 = 0.0471, wR2 = 0.1008                                                                        |
| Largest diff. peak and hole       | 0.823 and -0.836 e. Å <sup>-3</sup>                                                              |

**Table S7.** Crystal data and structure refinement for complex **9**

|                                   |                                                                                            |
|-----------------------------------|--------------------------------------------------------------------------------------------|
| Identification code               | <b>9</b>                                                                                   |
| CCDC number                       | 2104466                                                                                    |
| Empirical formula                 | C <sub>144</sub> H <sub>194</sub> N <sub>4</sub> S <sub>6</sub> Sm <sub>2</sub> •(Benzene) |
| Formula weight                    | 2474.08                                                                                    |
| Temperature                       | 193(2) K                                                                                   |
| Wavelength                        | 0.71073 Å                                                                                  |
| Crystal system, space group       | Triclinic, P-1                                                                             |
| a                                 | 14.0683(7) Å                                                                               |
| b                                 | 14.6664(8) Å                                                                               |
| c                                 | 19.7775(12) Å                                                                              |
| α                                 | 96.913(2) °                                                                                |
| β                                 | 99.970(2) °                                                                                |
| γ                                 | 117.769(2) °                                                                               |
| Volume                            | 3460.3(3) Å <sup>3</sup>                                                                   |
| Z, Calculated density             | 2, 1.187 Mg/m <sup>3</sup>                                                                 |
| Absorption coefficient            | 0.978 mm <sup>-1</sup>                                                                     |
| F(000)                            | 1306                                                                                       |
| Crystal size                      | 0.190 x 0.150 x 0.130 mm                                                                   |
| Theta range for data collection   | 2.134 to 25.000 °                                                                          |
| Limiting indices                  | -16<=h<=16, -17<=k<=17, -23<=l<=23                                                         |
| Reflections collected / unique    | 98619 / 12146 [R(int) = 0.0523]                                                            |
| Completeness to theta             | (25.000) 99.5 %                                                                            |
| Absorption correction             | Empirical                                                                                  |
| Max. and min. transmission        | 0.881 and 0.839                                                                            |
| Refinement method                 | Full-matrix least-squares on F <sup>2</sup>                                                |
| Data / restraints / parameters    | 12146 / 14 / 724                                                                           |
| Goodness-of-fit on F <sup>2</sup> | 1.033                                                                                      |
| Final R indices [I>2σ(I)]         | R1 = 0.0322, wR2 = 0.0737                                                                  |
| R indices (all data)              | R1 = 0.0404, wR2 = 0.0784                                                                  |
| Largest diff. peak and hole       | 0.963 and -0.606 e. Å <sup>-3</sup>                                                        |

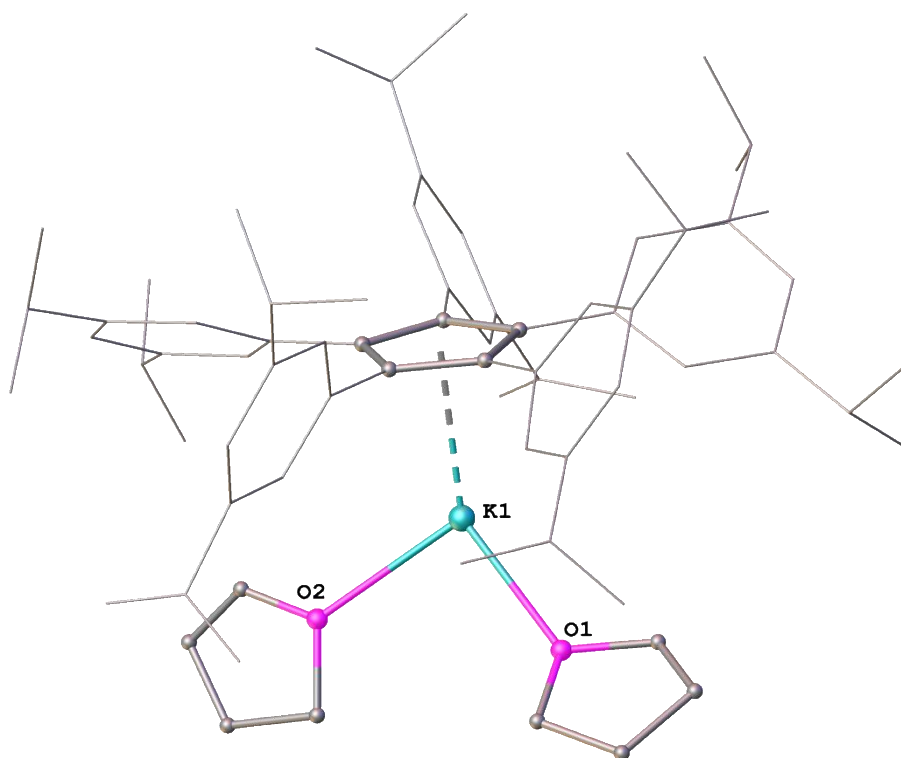

**Figure S29.** Molecular structure of  $[(\text{Cp}^{\text{Ar}5})\text{K}(\text{THF})_2]$  (**1**).

\*: Owing to the low-quality X-ray data set, the detailed discussion of bond lengths and angles is not warranted.



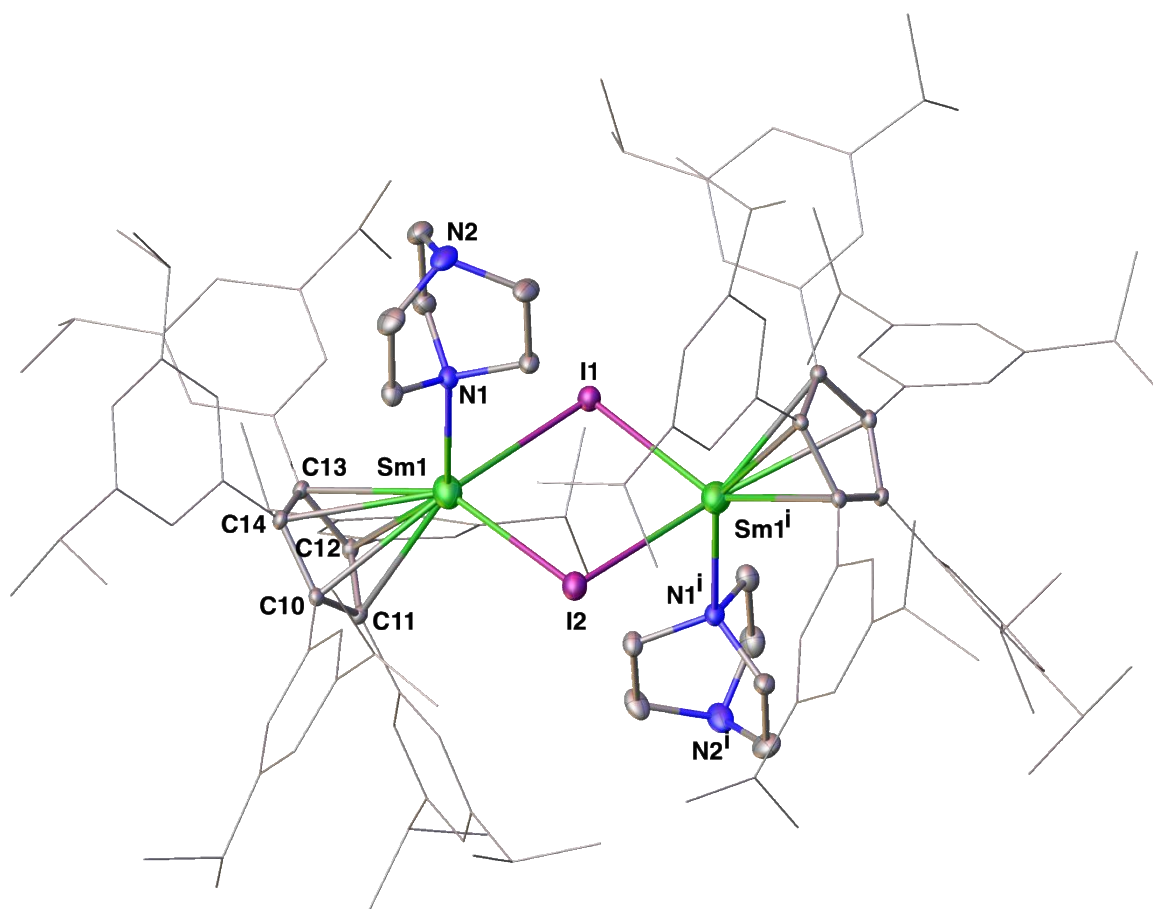

**Figure S30.** Molecular structure of  $[(\text{Cp}^{\text{Ar5}})\text{Sm}^{\text{II}}(\mu\text{-I})(\text{DABCO})]_2$  (**2**). All the hydrogen atoms are omitted for clarity. Selected interatomic distances [Å] and angles [deg]: Sm1–I1 3.2358(6), Sm1–I2 3.1523(7), Sm1–N1 2.664(5), Sm1–C10 2.802(5), Sm1–C11 2.818(5), Sm1–C12 2.849(5), Sm1–C13 2.858(5), Sm1–C14 2.834(5), Sm1–Cent1 2.557, Sm1---Sm1<sup>i</sup> 4.484(1), Sm1–I1–Sm1<sup>i</sup> 87.716(19), I1–Sm1–I2 90.803(16). Cent1: Centre of the Cp<sup>Ar5</sup> ring (C10~C14).

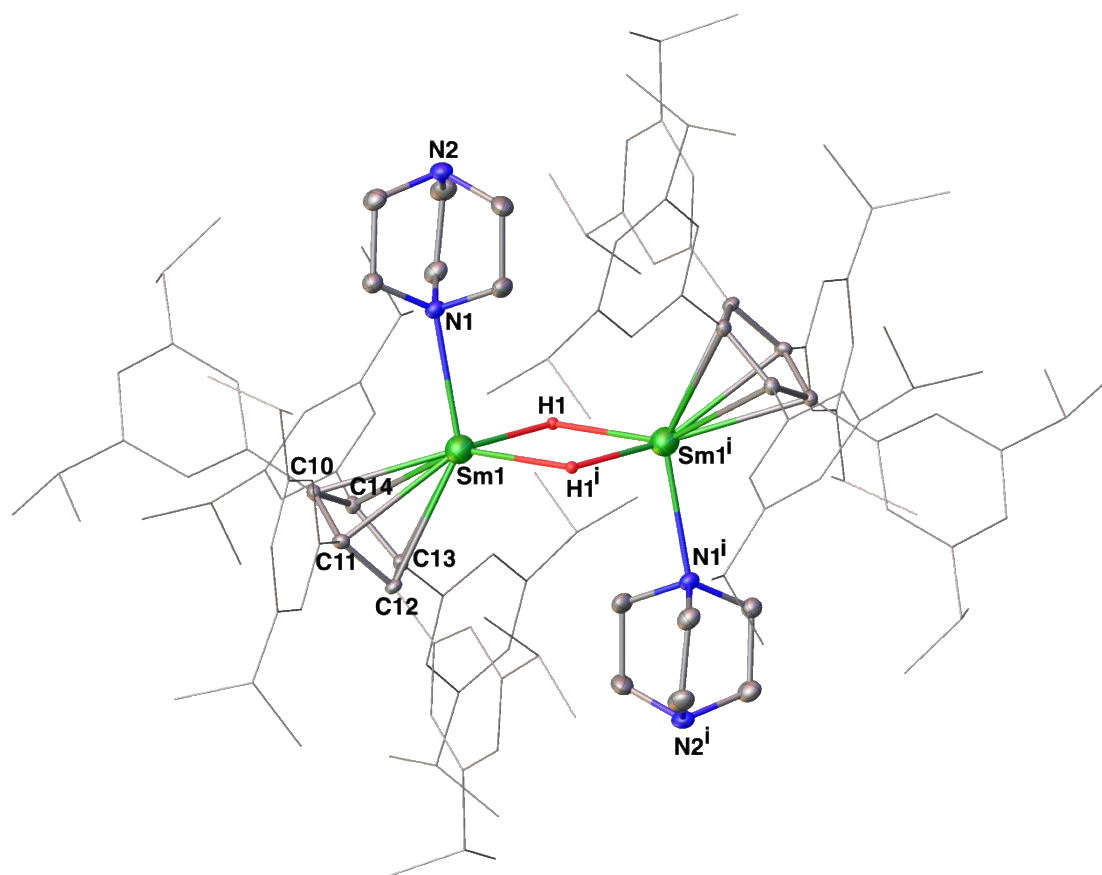

**Figure S31.** Molecular structure of  $[(\text{Cp}^{\text{Ar5}})\text{Sm}^{\text{II}}(\mu\text{-H})(\text{DABCO})]_2$  (**4**). Except the bridging hydride (H1 and H1<sup>i</sup>), all the hydrogen atoms are omitted for clarity. Selected interatomic distances [Å] and angles [deg]: Sm1–H1 2.26(6), Sm1–H1<sup>i</sup> 2.48(5), Sm1–N1 2.652 (4), Sm1–C11 2.800 (4), Sm1–C12 2.832 (4), Sm1–C13 2.885 (4), Sm1–C14 2.900 (4), Sm1–C15 2.887 (4), Sm1–Cent1 2.594, Sm1---Sm1<sup>i</sup> 3.7966 (5), Sm1–H1–Sm1<sup>i</sup> 106 (2), H1–Sm1–H1<sup>i</sup> 74 (2). Cent1: Centre of the Cp<sup>Ar5</sup> ring (C11~C15).

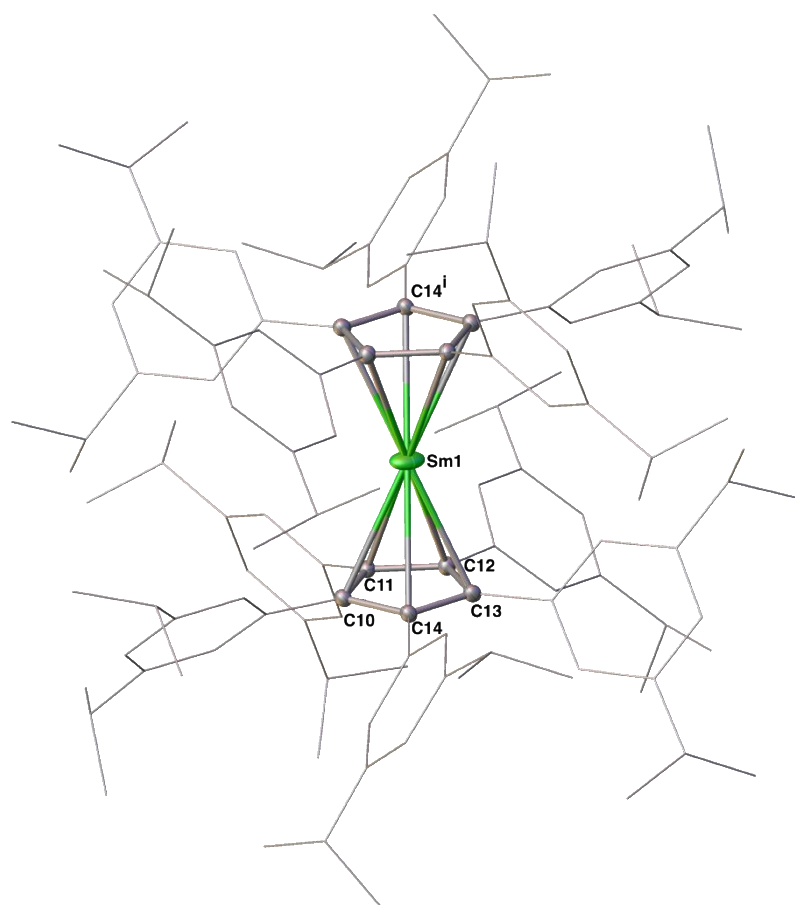

**Figure S32.** Molecular structure of  $[(\text{Cp}^{\text{Ar5}})_2\text{Sm}^{\text{II}}]$  (**5**). All the hydrogen atoms are omitted for clarity. Selected interatomic distances [ $\text{\AA}$ ]: Sm1–C10 2.790(3), Sm1–C11 2.807(3), Sm1–C12 2.761(4), Sm1–C13 2.722(4), Sm1–C14 2.749(3), Sm1–Cent1 2.486.

Cent1: Centre of the  $\text{Cp}^{\text{Ar5}}$  ring (C10~C14).

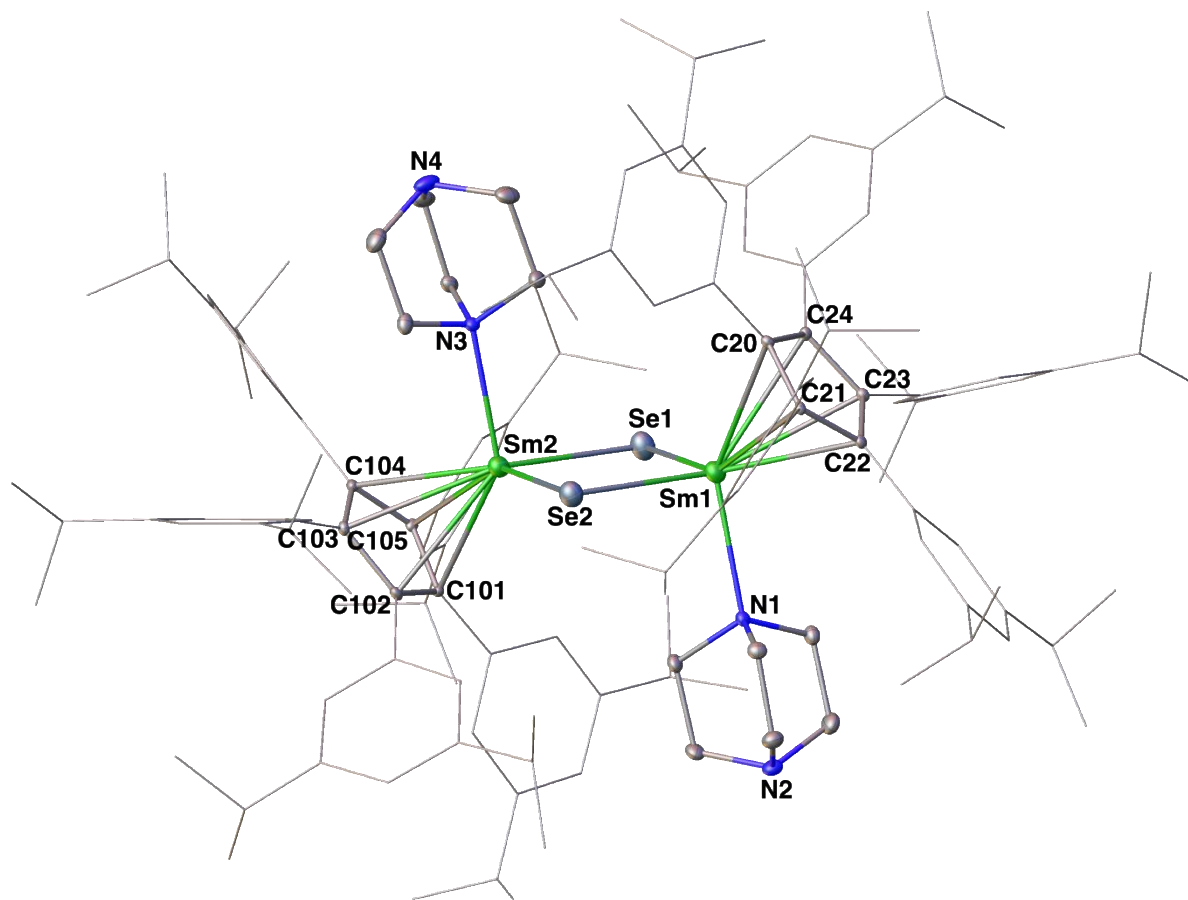

**Figure S33.** Molecular structure of  $[(\text{Cp}^{\text{Ar5}})\text{Sm}^{\text{III}}(\mu\text{-Se})(\text{DABCO})]_2$  (**6**). All the hydrogen atoms are omitted for clarity. Selected interatomic distances [Å] and angles [deg]: Sm1–Se1 2.7349(7), Sm1–Se2 2.7524(6), Sm1–N1 2.554(5), Sm1–C20 2.779(5), Sm1–C21 2.751(5), Sm1–C22 2.818(5), Sm1–C23 2.828(5), Sm1–C24 2.813(5), Sm1–Cent1 2.521, Sm2–Se1 2.7464(6), Sm2–Se2 2.7445(6), Sm2–N3 2.522(5), Sm2–C100 2.791(5), Sm2–C101 2.760(5), Sm2–C102 2.780(5), Sm2–C103 2.840(5), Sm2–C104 2.870(5), Sm2–Cent2 2.535, Sm1---Sm2 3.8699(4), Sm1–Se1–Sm2 89.83(2), Sm1–Se2–Sm2 89.50(2). Cent1: Centre of the  $\text{Cp}^{\text{Ar5}}$  ring (C20~C24).

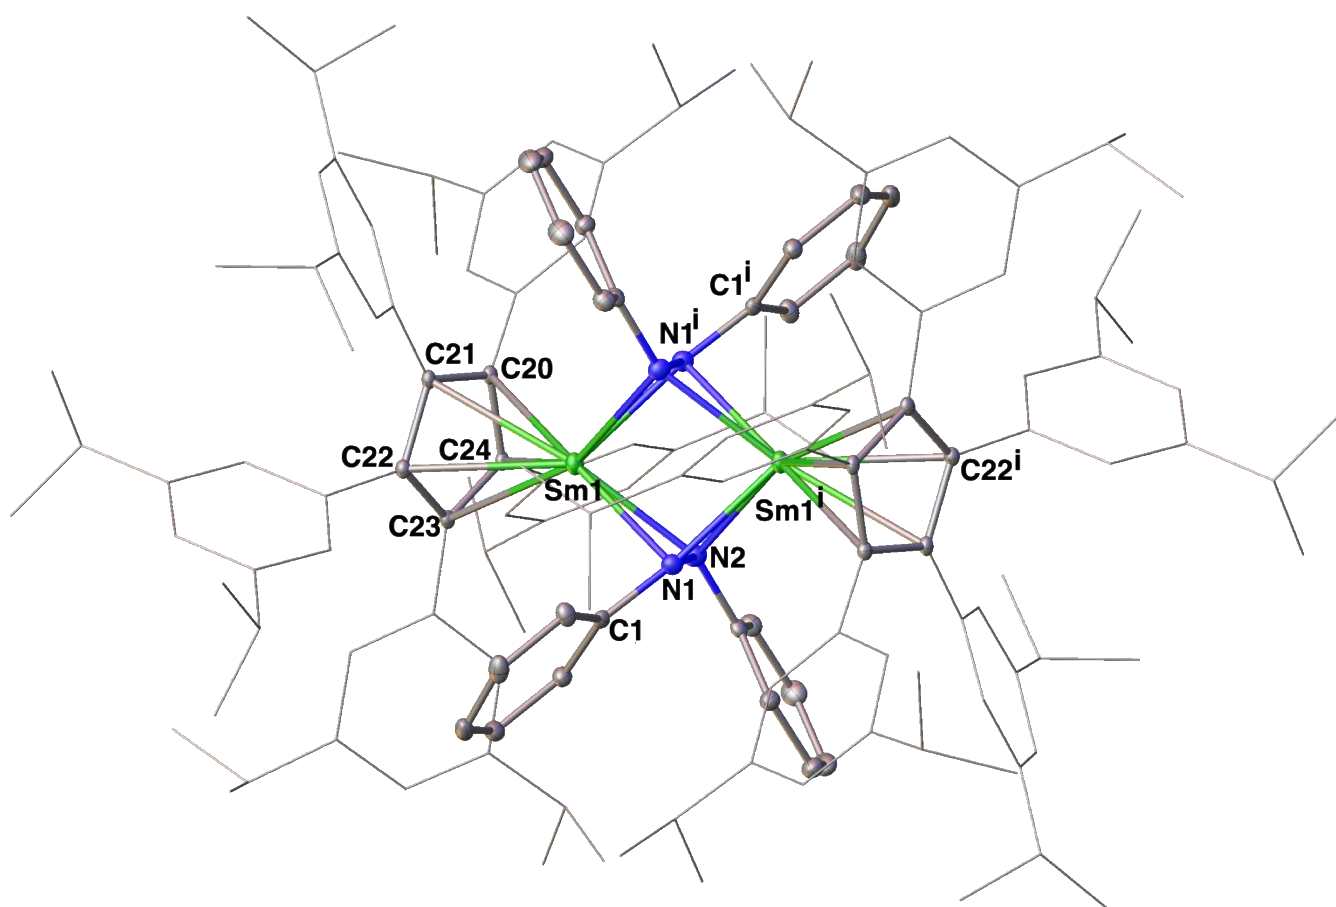

**Figure S34.** Molecular structure of  $[(\text{Cp}^{\text{Ar5}})\text{Sm}^{\text{III}}(\mu\text{-PhN-NPh})]_2$  (**7**). All the hydrogen atoms are omitted for clarity. Selected interatomic distances [ $\text{\AA}$ ] and angles [deg]: Sm1–N1 2.458(2), Sm1–N2 2.337(2), Sm1–C1 2.846(3), Sm1–C20 2.788(3), Sm1–C21 2.759(3), Sm1–C22 2.754(3), Sm1–C23 2.809(3), Sm1–C24 2.811(3), Sm1–Cent1 2.506, Sm1---Sm1' 3.4535(3), N1–N2 1.462(3), C1–N1–N2 117.2(2).

Cent1: Centre of the  $\text{Cp}^{\text{Ar5}}$  ring (C20~C24).

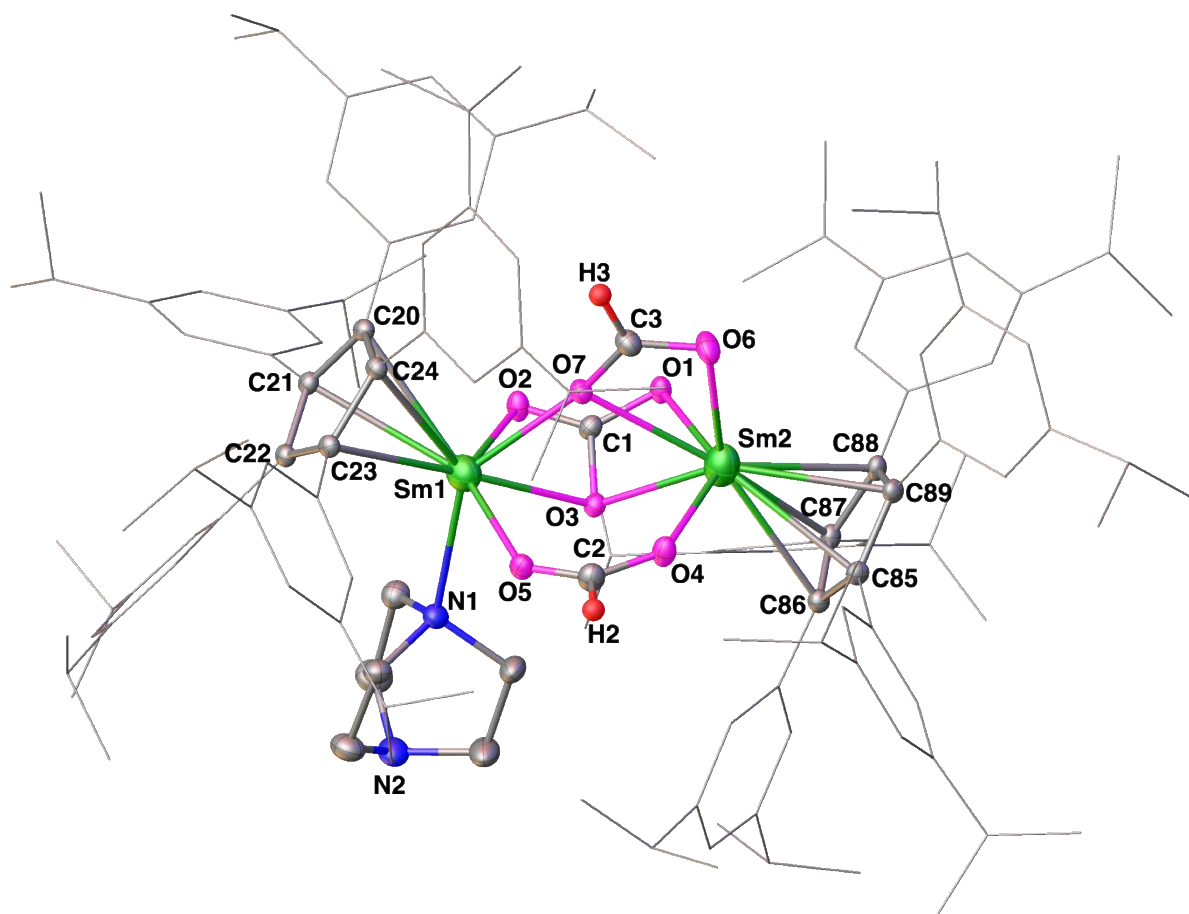

**Figure S35.** Molecular structure of  $[(\text{Cp}^{\text{Ar5}})\text{Sm}^{\text{III}}(\mu\text{-}\eta^2\text{:}\eta^1\text{-O}_2\text{CH})(\mu\text{-}\eta^2\text{:}\eta^2\text{-CO}_3)(\mu\text{-}\eta^1\text{:}\eta^1\text{-O}_2\text{CH})\text{Sm}^{\text{III}}(\text{Cp}^{\text{Ar5}})(\text{DABCO})]$  (**8**). All the hydrogen atoms, except H2 and H3, are omitted for clarity. Selected interatomic distances [ $\text{\AA}$ ] and angles [deg]: Sm1–O2 2.354(2), Sm1–O3 2.397(3), Sm1–O5 2.338(2), Sm1–O7 2.426(2), Sm1–N1 2.605(3), Sm1–C20 2.773(3), Sm1–C21 2.829(3), Sm1–C22 2.856(3), Sm1–C23 2.785(3), Sm1–C24 2.755(3), Sm2–O1 2.373(3), Sm2–O3 2.398(3), Sm2–O4 2.346(2), Sm2–O6 2.406(3), Sm2–O7 2.644(2), Sm2–C85 2.738(3), Sm2–C86 2.752(3), Sm2–C87 2.746(3), Sm2–C88 2.722(3), Sm2–C89 2.717(3), C1–O1 1.251(6), C1–O2 1.204(6), C1–O3 1.349(8), C2–O4 1.248(7), C2–O5 1.206(7), C3–O6 1.249(5), C3–O7 1.271(4), Sm1–Cent1 2.523, Sm2–Cent2 2.453, O2–C1–O1 133.6(6), O2–C1–O3 112.1(5), O1–C1–O3 113.8(5), O5–C2–O4 133.1(7), O6–C3–O7 121.7(4).  
Cent1: Centre of the  $\text{Cp}^{\text{Ar5}}$  ring (C20~C24),  
Cent2: Centre of the  $\text{Cp}^{\text{Ar5}}$  ring (C85~C89).

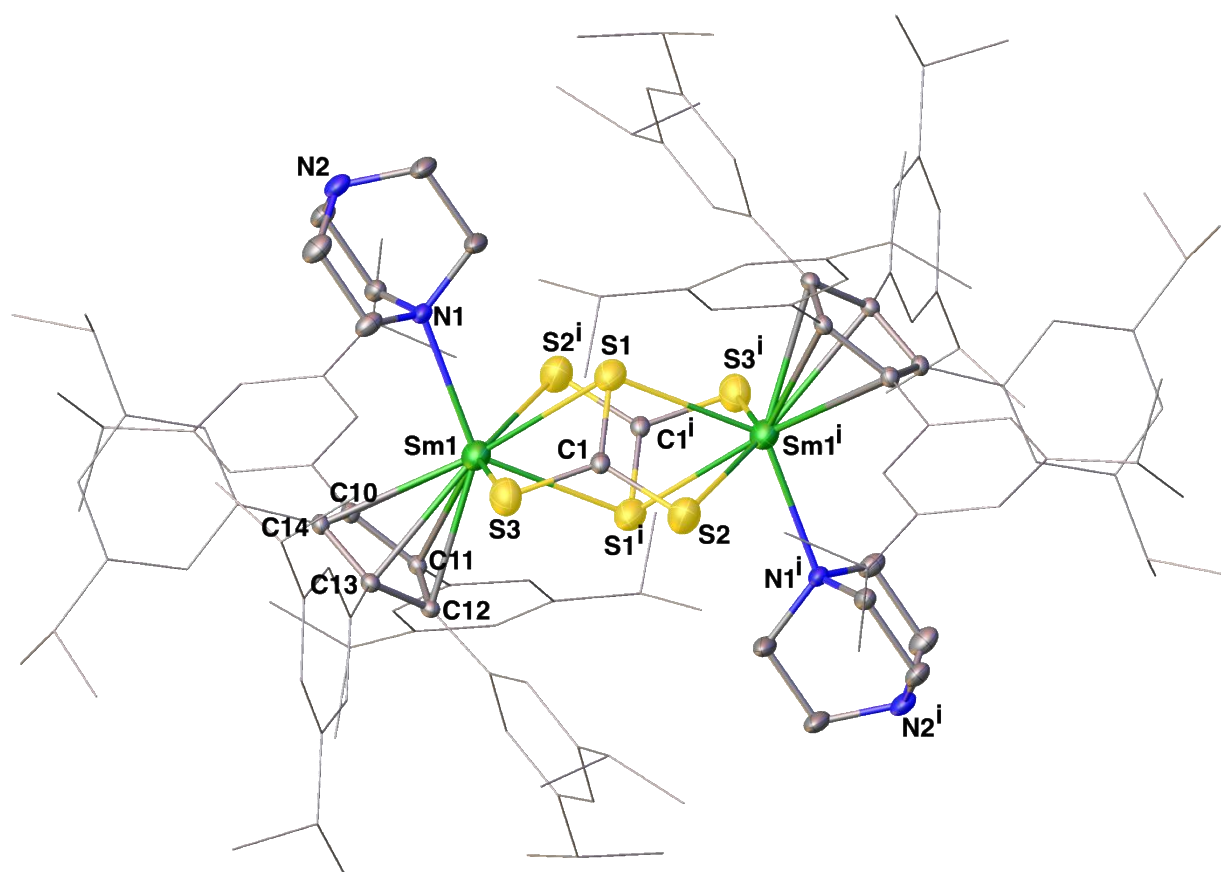

**Figure S36.** Molecular structure of  $[(\text{Cp}^{\text{Ar5}})\text{Sm}^{\text{III}}(\mu\text{-}\eta^2:\eta^2\text{-CS}_3)(\text{DABCO})]_2$  (**9**). All the hydrogen atoms are omitted for clarity. Selected interatomic distances [ $\text{\AA}$ ] and angles [deg]: Sm1–S1 2.9774(8), Sm1–S2 2.8243(8), Sm1–S3<sup>i</sup> 2.8393(8), C1–S1 1.726(3), C1–S2 1.698(3), C1–S3 1.705(3), Sm1–N1 2.581(3), Sm1–C10 2.834(3), Sm1–C11 2.784(3), Sm1–C12 2.741(3), Sm1–C13 2.771(3), Sm1–C14 2.847(3), Sm1–Cent1 2.518, S1–C1–S2 118.35(17), S1–C1–S3 119.28(17), S2–C1–S3 122.29(19).

Cent1: Centre of the  $\text{Cp}^{\text{Ar5}}$  ring (C10~C14).

### Computational details

The optimization of reactants, transition states, IRC and products were carried out by employing DFT hybrid functional (B3PW91) along with small core pseudopotential Stuttgart basis set for samarium atom<sup>[13]</sup> and People basis set<sup>[14]</sup> (6-31G\*\*) for the rest of the atoms. Frequency calculations were performed to locate saddle points for transition state structures, minima for rest of the structures and for obtaining thermal corrections over the energies. All the calculations were performed using Gaussian 09 suite of programs.<sup>[15]</sup>



### Optimized geometries

4

|   |              |              |              |
|---|--------------|--------------|--------------|
| C | -0.077139000 | 9.844161000  | 14.694858000 |
| H | 0.814854000  | 10.480519000 | 14.706472000 |
| H | -0.927051000 | 10.469116000 | 14.407196000 |
| C | 0.115864000  | 8.641198000  | 13.733938000 |
| H | -0.710260000 | 8.569789000  | 13.018630000 |
| H | 1.037678000  | 8.756352000  | 13.157934000 |
| C | 0.938016000  | 8.643584000  | 16.500427000 |
| H | 0.776770000  | 8.266396000  | 17.515537000 |
| H | 1.754056000  | 9.374213000  | 16.537344000 |
| C | 1.245131000  | 7.494922000  | 15.495549000 |
| H | 2.186353000  | 7.681099000  | 14.969133000 |
| H | 1.334038000  | 6.532231000  | 16.011257000 |
| C | -1.423589000 | 8.406402000  | 16.087644000 |
| H | -2.307744000 | 8.943756000  | 15.726710000 |
| H | -1.613915000 | 8.106362000  | 17.124083000 |
| C | -1.096190000 | 7.186356000  | 15.179944000 |
| H | -1.026231000 | 6.266416000  | 15.769805000 |
| H | -1.876456000 | 7.033955000  | 14.425758000 |
| C | -2.660543000 | 11.487731000 | 19.484938000 |
| C | -1.982374000 | 12.733409000 | 19.689434000 |
| C | -0.684813000 | 12.437368000 | 20.226655000 |
| C | -0.569340000 | 11.019735000 | 20.336645000 |
| C | -1.798178000 | 10.429027000 | 19.909116000 |
| C | -4.063940000 | 11.326033000 | 19.038149000 |
| C | -5.088648000 | 12.080872000 | 19.636642000 |
| H | -4.816443000 | 12.794938000 | 20.406103000 |
| C | -6.423986000 | 11.927829000 | 19.264050000 |
| C | -7.556373000 | 12.712906000 | 19.912508000 |
| H | -8.229324000 | 13.016535000 | 19.097176000 |
| C | -7.107840000 | 13.984689000 | 20.633748000 |
| H | -7.980590000 | 14.559323000 | 20.961201000 |
| H | -6.519912000 | 13.751929000 | 21.528859000 |
| H | -6.498459000 | 14.625255000 | 19.989583000 |
| C | -8.368036000 | 11.817028000 | 20.862003000 |
| H | -9.231249000 | 12.358434000 | 21.265313000 |
| H | -8.736134000 | 10.920911000 | 20.353488000 |

## SUPPORTING INFORMATION

---

|   |              |              |              |
|---|--------------|--------------|--------------|
| H | -7.749755000 | 11.490271000 | 21.705224000 |
| C | -6.736299000 | 10.994657000 | 18.264911000 |
| H | -7.776280000 | 10.879374000 | 17.966251000 |
| C | -5.750420000 | 10.220937000 | 17.649095000 |
| C | -6.091601000 | 9.173409000  | 16.601178000 |
| H | -5.164700000 | 8.962827000  | 16.049758000 |
| C | -7.132880000 | 9.646575000  | 15.581509000 |
| H | -7.256285000 | 8.901786000  | 14.787857000 |
| H | -8.115764000 | 9.790218000  | 16.043344000 |
| H | -6.840363000 | 10.594484000 | 15.119245000 |
| C | -6.535360000 | 7.862410000  | 17.268012000 |
| H | -6.722638000 | 7.084700000  | 16.518641000 |
| H | -5.773387000 | 7.494627000  | 17.961807000 |
| H | -7.460920000 | 8.012346000  | 17.835288000 |
| C | -4.421315000 | 10.401450000 | 18.048194000 |
| H | -3.647091000 | 9.787882000  | 17.591466000 |
| C | -2.571617000 | 14.048650000 | 19.327503000 |
| C | -3.216436000 | 14.220656000 | 18.090639000 |
| H | -3.236084000 | 13.399941000 | 17.375706000 |
| C | -3.881653000 | 15.402919000 | 17.745504000 |
| C | -4.615877000 | 15.472560000 | 16.413794000 |
| H | -4.021207000 | 14.886751000 | 15.698455000 |
| C | -4.762103000 | 16.887037000 | 15.848996000 |
| H | -5.199438000 | 16.848105000 | 14.846156000 |
| H | -5.428436000 | 17.501914000 | 16.464193000 |
| H | -3.799831000 | 17.403384000 | 15.777435000 |
| C | -5.993811000 | 14.799708000 | 16.522138000 |
| H | -5.912718000 | 13.773985000 | 16.892100000 |
| H | -6.637392000 | 15.355095000 | 17.214051000 |
| H | -6.491337000 | 14.775539000 | 15.545856000 |
| C | -3.891362000 | 16.452502000 | 18.668247000 |
| H | -4.412423000 | 17.375122000 | 18.427772000 |
| C | -3.242087000 | 16.336389000 | 19.904963000 |
| C | -3.285771000 | 17.464072000 | 20.925007000 |
| H | -2.581068000 | 17.196551000 | 21.723742000 |
| C | -4.679562000 | 17.578754000 | 21.560353000 |
| H | -4.690920000 | 18.352326000 | 22.336419000 |
| H | -5.431246000 | 17.847707000 | 20.809620000 |
| H | -4.987677000 | 16.632784000 | 22.015905000 |

## SUPPORTING INFORMATION

---

|   |              |              |              |
|---|--------------|--------------|--------------|
| C | -2.838607000 | 18.814134000 | 20.349817000 |
| H | -2.814837000 | 19.574058000 | 21.138689000 |
| H | -1.840947000 | 18.758880000 | 19.903670000 |
| H | -3.530624000 | 19.170988000 | 19.578821000 |
| C | -2.593076000 | 15.139036000 | 20.215637000 |
| H | -2.111596000 | 15.043046000 | 21.181655000 |
| C | 0.319174000  | 13.363455000 | 20.819571000 |
| C | 0.022215000  | 14.004881000 | 22.033684000 |
| H | -0.947121000 | 13.826143000 | 22.493742000 |
| C | 0.944533000  | 14.821960000 | 22.686625000 |
| C | 0.585372000  | 15.503275000 | 23.996084000 |
| H | -0.455101000 | 15.233395000 | 24.222495000 |
| C | 1.455397000  | 15.000966000 | 25.156445000 |
| H | 1.386105000  | 13.914134000 | 25.260973000 |
| H | 2.509727000  | 15.254169000 | 24.998833000 |
| H | 1.142476000  | 15.457183000 | 26.102315000 |
| C | 0.651425000  | 17.032358000 | 23.882018000 |
| H | 0.013798000  | 17.399279000 | 23.071761000 |
| H | 0.324971000  | 17.505320000 | 24.814890000 |
| H | 1.673320000  | 17.371807000 | 23.679477000 |
| C | 2.212959000  | 14.972796000 | 22.114480000 |
| H | 2.957032000  | 15.592760000 | 22.612015000 |
| C | 2.565453000  | 14.322930000 | 20.930491000 |
| C | 3.991598000  | 14.429104000 | 20.414340000 |
| H | 4.477196000  | 15.233624000 | 20.983658000 |
| C | 4.765881000  | 13.134269000 | 20.697280000 |
| H | 5.811375000  | 13.226132000 | 20.381782000 |
| H | 4.748094000  | 12.892917000 | 21.764379000 |
| H | 4.320433000  | 12.291396000 | 20.158782000 |
| C | 4.079275000  | 14.800577000 | 18.931549000 |
| H | 3.577374000  | 15.754047000 | 18.737051000 |
| H | 5.124938000  | 14.902934000 | 18.622844000 |
| H | 3.621769000  | 14.034353000 | 18.295423000 |
| C | 1.604044000  | 13.529052000 | 20.287364000 |
| H | 1.857103000  | 13.017789000 | 19.360158000 |
| C | 0.500800000  | 10.308830000 | 21.089954000 |
| C | 0.263746000  | 9.963400000  | 22.425473000 |
| H | -0.692482000 | 10.234390000 | 22.865048000 |
| C | 1.218300000  | 9.284079000  | 23.188614000 |

## SUPPORTING INFORMATION

---

|   |              |              |              |
|---|--------------|--------------|--------------|
| C | 0.962011000  | 8.938935000  | 24.646064000 |
| H | 1.826208000  | 8.356051000  | 24.993458000 |
| C | 0.880396000  | 10.202507000 | 25.513989000 |
| H | 1.786583000  | 10.808322000 | 25.416013000 |
| H | 0.028853000  | 10.826137000 | 25.220641000 |
| H | 0.754910000  | 9.941038000  | 26.570748000 |
| C | -0.286097000 | 8.065986000  | 24.827129000 |
| H | -0.217712000 | 7.149026000  | 24.234548000 |
| H | -0.412272000 | 7.785622000  | 25.878900000 |
| H | -1.192430000 | 8.594137000  | 24.513159000 |
| C | 2.430120000  | 8.942389000  | 22.583977000 |
| H | 3.173079000  | 8.406022000  | 23.171328000 |
| C | 2.711104000  | 9.275426000  | 21.254301000 |
| C | 4.025456000  | 8.871048000  | 20.605142000 |
| H | 4.093276000  | 9.415926000  | 19.653589000 |
| C | 5.249896000  | 9.253780000  | 21.445758000 |
| H | 6.173889000  | 9.032138000  | 20.900365000 |
| H | 5.247396000  | 10.318243000 | 21.695088000 |
| H | 5.284021000  | 8.689876000  | 22.384225000 |
| C | 4.045530000  | 7.369785000  | 20.281098000 |
| H | 3.212528000  | 7.091023000  | 19.628562000 |
| H | 4.978854000  | 7.089071000  | 19.779949000 |
| H | 3.963926000  | 6.773250000  | 21.196501000 |
| C | 1.735684000  | 9.962535000  | 20.523937000 |
| H | 1.942920000  | 10.235471000 | 19.489905000 |
| C | -2.209049000 | 9.031946000  | 20.194814000 |
| C | -1.366691000 | 7.930918000  | 19.978761000 |
| H | -0.380312000 | 8.101683000  | 19.556371000 |
| C | -1.752050000 | 6.630545000  | 20.334858000 |
| C | -0.827992000 | 5.437854000  | 20.148929000 |
| H | -1.406853000 | 4.544807000  | 20.421242000 |
| C | -0.374175000 | 5.253912000  | 18.697111000 |
| H | -1.232612000 | 5.169005000  | 18.022940000 |
| H | 0.238025000  | 6.098467000  | 18.362765000 |
| H | 0.231868000  | 4.347365000  | 18.590842000 |
| C | 0.375750000  | 5.513084000  | 21.097969000 |
| H | 0.048586000  | 5.552376000  | 22.141200000 |
| H | 1.024489000  | 4.637915000  | 20.976746000 |
| H | 0.974150000  | 6.409760000  | 20.908372000 |

## SUPPORTING INFORMATION

---

|    |              |              |              |
|----|--------------|--------------|--------------|
| C  | -3.007097000 | 6.443235000  | 20.912327000 |
| H  | -3.317540000 | 5.435911000  | 21.188870000 |
| C  | -3.870212000 | 7.516078000  | 21.167227000 |
| C  | -5.181780000 | 7.246381000  | 21.890162000 |
| H  | -5.563193000 | 6.290336000  | 21.502671000 |
| C  | -4.932182000 | 7.061059000  | 23.396179000 |
| H  | -5.859986000 | 6.798416000  | 23.917224000 |
| H  | -4.198582000 | 6.271796000  | 23.587007000 |
| H  | -4.546547000 | 7.987067000  | 23.837207000 |
| C  | -6.261399000 | 8.303232000  | 21.654737000 |
| H  | -6.427439000 | 8.486239000  | 20.589438000 |
| H  | -7.208748000 | 7.980706000  | 22.099701000 |
| H  | -5.995155000 | 9.259170000  | 22.118628000 |
| C  | -3.457945000 | 8.796289000  | 20.802681000 |
| H  | -4.100703000 | 9.646166000  | 21.001553000 |
| N  | -0.288837000 | 9.358236000  | 16.080332000 |
| N  | 0.180162000  | 7.389890000  | 14.494965000 |
| Sm | -0.659287000 | 11.667019000 | 17.443560000 |
| H  | 1.458894000  | 12.484053000 | 16.761180000 |
| C  | 0.536697000  | 15.656437000 | 17.505598000 |
| H  | -0.353550000 | 15.017342000 | 17.494691000 |
| H  | 1.388453000  | 15.032983000 | 17.791478000 |
| C  | 0.343115000  | 16.857411000 | 18.468988000 |
| H  | 1.168884000  | 16.926994000 | 19.184870000 |
| H  | -0.578998000 | 16.741129000 | 19.044215000 |
| C  | -0.481806000 | 16.860239000 | 15.704228000 |
| H  | -0.323355000 | 17.238215000 | 14.689051000 |
| H  | -1.298312000 | 16.129980000 | 15.668754000 |
| C  | -0.786667000 | 18.007908000 | 16.711047000 |
| H  | -1.727510000 | 17.822225000 | 17.238366000 |
| H  | -0.874922000 | 18.971396000 | 16.196681000 |
| C  | 1.880488000  | 17.096624000 | 16.113556000 |
| H  | 2.764877000  | 16.558235000 | 16.472104000 |
| H  | 2.069558000  | 17.398157000 | 15.077525000 |
| C  | 1.555090000  | 18.314434000 | 17.024870000 |
| H  | 1.485382000  | 19.236101000 | 16.437692000 |
| H  | 2.336173000  | 18.464172000 | 17.778772000 |
| C  | 3.140937000  | 14.031875000 | 12.761568000 |
| C  | 2.464460000  | 12.787214000 | 12.548903000 |

## SUPPORTING INFORMATION

---

|   |             |              |              |
|---|-------------|--------------|--------------|
| C | 1.168204000 | 13.084456000 | 12.009412000 |
| C | 1.052201000 | 14.503224000 | 11.906548000 |
| C | 2.280460000 | 15.092279000 | 12.337723000 |
| C | 4.543458000 | 14.190628000 | 13.212288000 |
| C | 5.568591000 | 13.434562000 | 12.615983000 |
| H | 5.297510000 | 12.721346000 | 11.845316000 |
| C | 6.903162000 | 13.585447000 | 12.992236000 |
| C | 8.036171000 | 12.798732000 | 12.346847000 |
| H | 8.707272000 | 12.495458000 | 13.163839000 |
| C | 7.587946000 | 11.526456000 | 11.626303000 |
| H | 8.460766000 | 10.950424000 | 11.301483000 |
| H | 7.002168000 | 11.758655000 | 10.729632000 |
| H | 6.976458000 | 10.887495000 | 12.270066000 |
| C | 8.850523000 | 13.692715000 | 11.397896000 |
| H | 9.714184000 | 13.150152000 | 10.997078000 |
| H | 9.218186000 | 14.589183000 | 11.906097000 |
| H | 8.234267000 | 14.018907000 | 10.552975000 |
| C | 7.214282000 | 14.518183000 | 13.992140000 |
| H | 8.253688000 | 14.631917000 | 14.293352000 |
| C | 6.227903000 | 15.293277000 | 14.605422000 |
| C | 6.567366000 | 16.341250000 | 15.653507000 |
| H | 5.641272000 | 16.546321000 | 16.208312000 |
| C | 7.614951000 | 15.873253000 | 16.669032000 |
| H | 7.735554000 | 16.617329000 | 17.463774000 |
| H | 8.597477000 | 15.737588000 | 16.203990000 |
| H | 7.330724000 | 14.922366000 | 17.130399000 |
| C | 7.001733000 | 17.655323000 | 14.986434000 |
| H | 7.186816000 | 18.433494000 | 15.735882000 |
| H | 6.235786000 | 18.019371000 | 14.295064000 |
| H | 7.926493000 | 17.510916000 | 14.416413000 |
| C | 4.899476000 | 15.114313000 | 14.203336000 |
| H | 4.123957000 | 15.726979000 | 14.658463000 |
| C | 3.049519000 | 11.470828000 | 12.913497000 |
| C | 3.684363000 | 11.296468000 | 14.155228000 |
| H | 3.699948000 | 12.116681000 | 14.870875000 |
| C | 4.345959000 | 10.112976000 | 14.503553000 |
| C | 5.071253000 | 10.041033000 | 15.839905000 |
| H | 4.473394000 | 10.627900000 | 16.551671000 |
| C | 5.210218000 | 8.625776000  | 16.404563000 |

## SUPPORTING INFORMATION

---

|   |              |              |              |
|---|--------------|--------------|--------------|
| H | 5.640271000  | 8.662830000  | 17.410565000 |
| H | 5.879526000  | 8.009818000  | 15.793684000 |
| H | 4.246184000  | 8.111698000  | 16.468592000 |
| C | 6.451492000  | 10.710570000 | 15.740377000 |
| H | 6.375211000  | 11.736646000 | 15.370367000 |
| H | 7.097941000  | 10.153910000 | 15.052174000 |
| H | 6.943019000  | 10.733043000 | 16.719723000 |
| C | 4.361453000  | 9.064623000  | 13.579567000 |
| H | 4.880116000  | 8.141358000  | 13.822699000 |
| C | 3.722016000  | 9.183107000  | 12.337928000 |
| C | 3.774201000  | 8.057967000  | 11.315414000 |
| H | 3.073521000  | 8.325894000  | 10.513270000 |
| C | 5.171991000  | 7.948741000  | 10.687836000 |
| H | 5.189869000  | 7.177379000  | 9.909697000  |
| H | 5.920002000  | 7.679665000  | 11.442190000 |
| H | 5.480232000  | 8.896788000  | 10.236749000 |
| C | 3.327503000  | 6.704913000  | 11.883785000 |
| H | 3.310574000  | 5.947502000  | 11.092337000 |
| H | 2.326936000  | 6.755602000  | 12.323959000 |
| H | 4.015986000  | 6.347373000  | 12.657609000 |
| C | 3.076502000  | 10.381460000 | 12.024145000 |
| H | 2.603220000  | 10.479479000 | 11.054346000 |
| C | 0.166728000  | 12.160768000 | 11.408605000 |
| C | 0.472408000  | 11.516405000 | 10.198088000 |
| H | 1.445938000  | 11.692413000 | 9.746021000  |
| C | -0.446199000 | 10.700951000 | 9.538054000  |
| C | -0.076870000 | 10.016442000 | 8.233085000  |
| H | 0.966467000  | 10.282879000 | 8.015984000  |
| C | -0.934529000 | 10.519232000 | 7.063774000  |
| H | -0.860847000 | 11.605609000 | 6.957672000  |
| H | -1.991077000 | 10.269695000 | 7.212108000  |
| H | -0.614314000 | 10.060088000 | 6.121775000  |
| C | -0.148611000 | 8.487750000  | 8.349119000  |
| H | 0.479980000  | 8.120228000  | 9.166140000  |
| H | 0.185472000  | 8.012248000  | 7.420255000  |
| H | -1.173481000 | 8.151767000  | 8.542188000  |
| C | -1.720350000 | 10.554708000 | 10.098627000 |
| H | -2.461646000 | 9.936276000  | 9.595113000  |
| C | -2.081801000 | 11.207680000 | 11.278128000 |

## SUPPORTING INFORMATION

---

|   |              |              |              |
|---|--------------|--------------|--------------|
| C | -3.512346000 | 11.105480000 | 11.782869000 |
| H | -3.999279000 | 10.311475000 | 11.200145000 |
| C | -4.276235000 | 12.408827000 | 11.511530000 |
| H | -5.324641000 | 12.319162000 | 11.817818000 |
| H | -4.248652000 | 12.664407000 | 10.447978000 |
| H | -3.830157000 | 13.241800000 | 12.064681000 |
| C | -3.612403000 | 10.715328000 | 13.260268000 |
| H | -3.118542000 | 9.755860000  | 13.445751000 |
| H | -4.660837000 | 10.616263000 | 13.560753000 |
| H | -3.153811000 | 11.470142000 | 13.909158000 |
| C | -1.123843000 | 11.999751000 | 11.928653000 |
| H | -1.386205000 | 12.513341000 | 12.852033000 |
| C | -0.017239000 | 15.215073000 | 11.152808000 |
| C | 0.214806000  | 15.551242000 | 9.814113000  |
| H | 1.167499000  | 15.273168000 | 9.371300000  |
| C | -0.740359000 | 16.230692000 | 9.051742000  |
| C | -0.489287000 | 16.566567000 | 7.591206000  |
| H | -1.353546000 | 17.149391000 | 7.243873000  |
| C | -0.414026000 | 15.297825000 | 6.730328000  |
| H | -1.321059000 | 14.694535000 | 6.835704000  |
| H | 0.437466000  | 14.674142000 | 7.023686000  |
| H | -0.292471000 | 15.552946000 | 5.671569000  |
| C | 0.760119000  | 17.435573000 | 7.400114000  |
| H | 0.696446000  | 18.355891000 | 7.987974000  |
| H | 0.882516000  | 17.709898000 | 6.346302000  |
| H | 1.666469000  | 16.906864000 | 7.713113000  |
| C | -1.947757000 | 16.581670000 | 9.660046000  |
| H | -2.690847000 | 17.118152000 | 9.073023000  |
| C | -2.223949000 | 16.257686000 | 10.992950000 |
| C | -3.532859000 | 16.671520000 | 11.647216000 |
| H | -3.600951000 | 16.126627000 | 12.598749000 |
| C | -4.763837000 | 16.298869000 | 10.811716000 |
| H | -5.683570000 | 16.526984000 | 11.361600000 |
| H | -4.770694000 | 15.234679000 | 10.561283000 |
| H | -4.798200000 | 16.864073000 | 9.874043000  |
| C | -3.540172000 | 18.172620000 | 11.972511000 |
| H | -2.701881000 | 18.444531000 | 12.621130000 |
| H | -4.468893000 | 18.459755000 | 12.478520000 |
| H | -3.458487000 | 18.769254000 | 11.057187000 |



## SUPPORTING INFORMATION

---

|    |              |              |              |
|----|--------------|--------------|--------------|
| C  | -1.247865000 | 15.570476000 | 11.722321000 |
| H  | -1.451054000 | 15.305150000 | 12.759176000 |
| C  | 2.694227000  | 16.488040000 | 12.050104000 |
| C  | 1.852160000  | 17.591007000 | 12.257607000 |
| H  | 0.863726000  | 17.423427000 | 12.676194000 |
| C  | 2.240868000  | 18.889637000 | 11.898975000 |
| C  | 1.317173000  | 20.083960000 | 12.076215000 |
| H  | 1.900233000  | 20.976075000 | 11.809860000 |
| C  | 0.848735000  | 20.268396000 | 13.523267000 |
| H  | 1.700353000  | 20.350841000 | 14.206301000 |
| H  | 0.230952000  | 19.425302000 | 13.851045000 |
| H  | 0.243930000  | 21.176428000 | 13.623663000 |
| C  | 0.123072000  | 20.010626000 | 11.114809000 |
| H  | 0.461011000  | 19.970652000 | 10.075017000 |
| H  | -0.525583000 | 20.886825000 | 11.229086000 |
| H  | -0.478464000 | 19.114853000 | 11.298639000 |
| C  | 3.498707000  | 19.073555000 | 11.326578000 |
| H  | 3.811735000  | 20.079538000 | 11.048077000 |
| C  | 4.361353000  | 17.998626000 | 11.079139000 |
| C  | 5.676011000  | 18.263986000 | 10.360208000 |
| H  | 6.057858000  | 19.220340000 | 10.746516000 |
| C  | 5.432095000  | 18.445718000 | 8.852804000  |
| H  | 6.362265000  | 18.705101000 | 8.334334000  |
| H  | 4.700711000  | 19.235873000 | 8.657198000  |
| H  | 5.046178000  | 17.519250000 | 8.412971000  |
| C  | 6.752777000  | 17.205745000 | 10.602130000 |
| H  | 6.914622000  | 17.025105000 | 11.668461000 |
| H  | 7.702318000  | 17.525337000 | 10.159700000 |
| H  | 6.486313000  | 16.249143000 | 10.139734000 |
| C  | 3.946006000  | 16.720272000 | 11.446658000 |
| H  | 4.588627000  | 15.869081000 | 11.253187000 |
| N  | 0.745848000  | 16.144908000 | 16.120565000 |
| N  | 0.279234000  | 18.110377000 | 17.710794000 |
| Sm | 1.104530000  | 13.815437000 | 14.791824000 |
| H  | -1.010571000 | 13.009334000 | 15.486459000 |

### Int1

|   |             |              |              |
|---|-------------|--------------|--------------|
| C | 0.157456000 | 10.191702000 | 14.408160000 |
| H | 1.067390000 | 10.792737000 | 14.512653000 |

## SUPPORTING INFORMATION

---

|   |              |              |              |
|---|--------------|--------------|--------------|
| H | -0.664529000 | 10.873808000 | 14.177764000 |
| C | 0.334345000  | 9.107137000  | 13.314791000 |
| H | -0.496103000 | 9.126702000  | 12.601189000 |
| H | 1.254400000  | 9.279126000  | 12.751022000 |
| C | 1.101331000  | 8.774143000  | 16.088366000 |
| H | 0.891965000  | 8.261668000  | 17.032977000 |
| H | 1.920863000  | 9.481636000  | 16.257967000 |
| C | 1.435388000  | 7.765154000  | 14.952139000 |
| H | 2.383249000  | 8.020344000  | 14.469610000 |
| H | 1.526541000  | 6.746572000  | 15.345415000 |
| C | -1.243875000 | 8.626023000  | 15.580931000 |
| H | -2.103321000 | 9.215308000  | 15.244166000 |
| H | -1.481149000 | 8.218226000  | 16.568497000 |
| C | -0.899800000 | 7.503664000  | 14.561992000 |
| H | -0.842723000 | 6.527116000  | 15.055686000 |
| H | -1.666696000 | 7.429718000  | 13.782564000 |
| C | -3.014252000 | 10.639991000 | 18.990703000 |
| C | -2.604024000 | 11.938322000 | 19.420107000 |
| C | -1.317788000 | 11.807568000 | 20.056334000 |
| C | -0.954037000 | 10.416462000 | 20.005380000 |
| C | -2.013706000 | 9.695674000  | 19.376635000 |
| C | -4.345630000 | 10.302503000 | 18.425314000 |
| C | -5.523652000 | 10.738558000 | 19.056314000 |
| H | -5.435925000 | 11.345107000 | 19.951407000 |
| C | -6.787862000 | 10.408532000 | 18.560500000 |
| C | -8.075648000 | 10.826687000 | 19.256064000 |
| H | -8.823725000 | 10.976571000 | 18.464527000 |
| C | -7.966480000 | 12.136977000 | 20.037718000 |
| H | -8.954405000 | 12.446670000 | 20.395306000 |
| H | -7.323823000 | 12.025385000 | 20.917959000 |
| H | -7.553864000 | 12.942077000 | 19.423168000 |
| C | -8.593053000 | 9.700137000  | 20.164773000 |
| H | -9.552099000 | 9.973745000  | 20.619446000 |
| H | -8.733402000 | 8.769094000  | 19.607313000 |
| H | -7.880753000 | 9.500521000  | 20.972997000 |
| C | -6.869216000 | 9.628683000  | 17.400696000 |
| H | -7.852954000 | 9.377992000  | 17.006701000 |
| C | -5.722994000 | 9.168435000  | 16.747225000 |
| C | -5.818769000 | 8.310985000  | 15.495712000 |

## SUPPORTING INFORMATION

---

|   |              |              |              |
|---|--------------|--------------|--------------|
| H | -4.796456000 | 8.190581000  | 15.111596000 |
| C | -6.648553000 | 8.977573000  | 14.391110000 |
| H | -6.635404000 | 8.371146000  | 13.478638000 |
| H | -7.695364000 | 9.094082000  | 14.691983000 |
| H | -6.260803000 | 9.971129000  | 14.146481000 |
| C | -6.355983000 | 6.908646000  | 15.813878000 |
| H | -6.373701000 | 6.283787000  | 14.913570000 |
| H | -5.735580000 | 6.411048000  | 16.564776000 |
| H | -7.378042000 | 6.959205000  | 16.205545000 |
| C | -4.476346000 | 9.509706000  | 17.277451000 |
| H | -3.579235000 | 9.144844000  | 16.789646000 |
| C | -3.482027000 | 13.123089000 | 19.226686000 |
| C | -3.966104000 | 13.459937000 | 17.951728000 |
| H | -3.658180000 | 12.861897000 | 17.094262000 |
| C | -4.876914000 | 14.501946000 | 17.744248000 |
| C | -5.433448000 | 14.752969000 | 16.351550000 |
| H | -4.710333000 | 14.334571000 | 15.639132000 |
| C | -5.604067000 | 16.236848000 | 16.012258000 |
| H | -5.905103000 | 16.352443000 | 14.965622000 |
| H | -6.383129000 | 16.706143000 | 16.623232000 |
| H | -4.673550000 | 16.791634000 | 16.161201000 |
| C | -6.758105000 | 13.995858000 | 16.165065000 |
| H | -6.641169000 | 12.928833000 | 16.376192000 |
| H | -7.524524000 | 14.388529000 | 16.843105000 |
| H | -7.128738000 | 14.107149000 | 15.139561000 |
| C | -5.297863000 | 15.244311000 | 18.851887000 |
| H | -5.991564000 | 16.069199000 | 18.710579000 |
| C | -4.862151000 | 14.931470000 | 20.143851000 |
| C | -5.329456000 | 15.737275000 | 21.345321000 |
| H | -4.896225000 | 15.264151000 | 22.237065000 |
| C | -6.854289000 | 15.719938000 | 21.509832000 |
| H | -7.150808000 | 16.262885000 | 22.414140000 |
| H | -7.353213000 | 16.198331000 | 20.659960000 |
| H | -7.233881000 | 14.697126000 | 21.586140000 |
| C | -4.802555000 | 17.178476000 | 21.286047000 |
| H | -5.089952000 | 17.735026000 | 22.185063000 |
| H | -3.711427000 | 17.199756000 | 21.205412000 |
| H | -5.210700000 | 17.711770000 | 20.420215000 |
| C | -3.980624000 | 13.860523000 | 20.311813000 |

## SUPPORTING INFORMATION

---

|   |              |              |              |
|---|--------------|--------------|--------------|
| H | -3.712820000 | 13.558513000 | 21.320211000 |
| C | -0.410498000 | 12.840493000 | 20.612626000 |
| C | -0.848151000 | 13.931157000 | 21.381537000 |
| H | -1.904232000 | 14.060813000 | 21.568991000 |
| C | 0.037687000  | 14.851309000 | 21.945575000 |
| C | -0.492550000 | 15.991240000 | 22.800541000 |
| H | -1.587244000 | 15.904163000 | 22.804938000 |
| C | -0.017271000 | 15.877722000 | 24.255606000 |
| H | -0.292081000 | 14.910268000 | 24.686657000 |
| H | 1.071682000  | 15.976125000 | 24.326434000 |
| H | -0.462273000 | 16.666576000 | 24.872374000 |
| C | -0.144355000 | 17.366349000 | 22.216162000 |
| H | -0.520080000 | 17.469421000 | 21.193001000 |
| H | -0.583469000 | 18.168564000 | 22.819702000 |
| H | 0.939195000  | 17.527579000 | 22.193793000 |
| C | 1.409236000  | 14.676363000 | 21.744047000 |
| H | 2.115518000  | 15.374143000 | 22.191461000 |
| C | 1.899119000  | 13.602785000 | 20.993039000 |
| C | 3.405179000  | 13.407548000 | 20.879357000 |
| H | 3.840966000  | 14.394649000 | 20.662454000 |
| C | 3.981285000  | 12.945085000 | 22.228755000 |
| H | 5.072406000  | 12.854399000 | 22.176452000 |
| H | 3.737507000  | 13.646167000 | 23.032562000 |
| H | 3.569185000  | 11.967967000 | 22.501952000 |
| C | 3.835995000  | 12.448799000 | 19.768422000 |
| H | 3.393494000  | 12.698564000 | 18.798362000 |
| H | 4.926461000  | 12.456312000 | 19.665574000 |
| H | 3.536978000  | 11.421479000 | 20.001878000 |
| C | 0.982369000  | 12.715901000 | 20.424570000 |
| H | 1.361215000  | 11.874748000 | 19.853214000 |
| C | 0.096633000  | 9.791198000  | 20.863671000 |
| C | -0.123440000 | 9.754932000  | 22.245084000 |
| H | -1.044735000 | 10.185897000 | 22.627487000 |
| C | 0.799810000  | 9.181734000  | 23.125588000 |
| C | 0.532679000  | 9.136768000  | 24.620533000 |
| H | 1.409521000  | 8.669221000  | 25.089359000 |
| C | 0.383537000  | 10.541963000 | 25.218707000 |
| H | 1.262620000  | 11.158331000 | 25.007459000 |
| H | -0.489731000 | 11.058257000 | 24.805980000 |

## SUPPORTING INFORMATION

---

|   |              |              |              |
|---|--------------|--------------|--------------|
| H | 0.255243000  | 10.487903000 | 26.305622000 |
| C | -0.687014000 | 8.264526000  | 24.949243000 |
| H | -0.565187000 | 7.249471000  | 24.558943000 |
| H | -0.837129000 | 8.199907000  | 26.032875000 |
| H | -1.599878000 | 8.680812000  | 24.509664000 |
| C | 1.975070000  | 8.643555000  | 22.598105000 |
| H | 2.699386000  | 8.200487000  | 23.279513000 |
| C | 2.243021000  | 8.664663000  | 21.224052000 |
| C | 3.540935000  | 8.089273000  | 20.676329000 |
| H | 3.558510000  | 8.303191000  | 19.598874000 |
| C | 4.779783000  | 8.747919000  | 21.299347000 |
| H | 5.694218000  | 8.360645000  | 20.836173000 |
| H | 4.767933000  | 9.833523000  | 21.172267000 |
| H | 4.842399000  | 8.539106000  | 22.372870000 |
| C | 3.613531000  | 6.566027000  | 20.849299000 |
| H | 2.776300000  | 6.064847000  | 20.357215000 |
| H | 4.543104000  | 6.171361000  | 20.423661000 |
| H | 3.589680000  | 6.289287000  | 21.909254000 |
| C | 1.288605000  | 9.233902000  | 20.373852000 |
| H | 1.489226000  | 9.262599000  | 19.303214000 |
| C | -2.245167000 | 8.233973000  | 19.509660000 |
| C | -1.282174000 | 7.262024000  | 19.184781000 |
| H | -0.330542000 | 7.589109000  | 18.780419000 |
| C | -1.517160000 | 5.899471000  | 19.391436000 |
| C | -0.485751000 | 4.816883000  | 19.109800000 |
| H | -1.036094000 | 3.958020000  | 18.698959000 |
| C | 0.576619000  | 5.204344000  | 18.082312000 |
| H | 0.121026000  | 5.529527000  | 17.141465000 |
| H | 1.217048000  | 6.014768000  | 18.447499000 |
| H | 1.226439000  | 4.350466000  | 17.863897000 |
| C | 0.165661000  | 4.353084000  | 20.423063000 |
| H | -0.585819000 | 3.982604000  | 21.126690000 |
| H | 0.888572000  | 3.549115000  | 20.242547000 |
| H | 0.687413000  | 5.183927000  | 20.908819000 |
| C | -2.743812000 | 5.509641000  | 19.938794000 |
| H | -2.937298000 | 4.449787000  | 20.102714000 |
| C | -3.717148000 | 6.440998000  | 20.297554000 |
| C | -5.020737000 | 5.982736000  | 20.930489000 |
| H | -4.922327000 | 4.904194000  | 21.116431000 |

## SUPPORTING INFORMATION

---

|    |              |              |              |
|----|--------------|--------------|--------------|
| C  | -5.273241000 | 6.657944000  | 22.284650000 |
| H  | -6.177406000 | 6.254155000  | 22.753782000 |
| H  | -4.433508000 | 6.501205000  | 22.968827000 |
| H  | -5.414314000 | 7.738187000  | 22.171998000 |
| C  | -6.210764000 | 6.181003000  | 19.982784000 |
| H  | -6.067939000 | 5.624832000  | 19.051222000 |
| H  | -7.140471000 | 5.832505000  | 20.447318000 |
| H  | -6.336568000 | 7.236763000  | 19.722263000 |
| C  | -3.454476000 | 7.794398000  | 20.070437000 |
| H  | -4.194999000 | 8.536023000  | 20.351076000 |
| N  | -0.100916000 | 9.557668000  | 15.723603000 |
| N  | 0.388425000  | 7.775603000  | 13.926016000 |
| Sm | -0.498702000 | 11.708643000 | 17.385080000 |
| H  | 1.741303000  | 12.271368000 | 16.808522000 |
| C  | 2.372780000  | 15.647063000 | 17.956956000 |
| H  | 1.403904000  | 15.157469000 | 18.089711000 |
| H  | 3.141755000  | 14.888988000 | 18.132754000 |
| C  | 2.533750000  | 16.860604000 | 18.914126000 |
| H  | 3.464872000  | 16.792415000 | 19.487749000 |
| H  | 1.711167000  | 16.897913000 | 19.634259000 |
| C  | 1.392715000  | 17.049786000 | 16.250406000 |
| H  | 1.581616000  | 17.455276000 | 15.252403000 |
| H  | 0.442524000  | 16.507130000 | 16.208062000 |
| C  | 1.361037000  | 18.176570000 | 17.319521000 |
| H  | 0.487596000  | 18.082769000 | 17.974219000 |
| H  | 1.309313000  | 19.162013000 | 16.844566000 |
| C  | 3.767614000  | 16.830087000 | 16.404121000 |
| H  | 4.568706000  | 16.156470000 | 16.723257000 |
| H  | 3.922694000  | 17.060711000 | 15.346186000 |
| C  | 3.740448000  | 18.110710000 | 17.284646000 |
| H  | 3.709673000  | 19.013309000 | 16.664887000 |
| H  | 4.637345000  | 18.177802000 | 17.910664000 |
| C  | 3.937411000  | 13.919902000 | 13.021996000 |
| C  | 3.119763000  | 12.787252000 | 12.705797000 |
| C  | 1.872040000  | 13.282250000 | 12.197585000 |
| C  | 1.924098000  | 14.707534000 | 12.224923000 |
| C  | 3.213648000  | 15.112886000 | 12.699080000 |
| C  | 5.369768000  | 13.806064000 | 13.410851000 |
| C  | 6.274862000  | 13.208902000 | 12.522468000 |

## SUPPORTING INFORMATION

---

|   |             |              |              |
|---|-------------|--------------|--------------|
| H | 5.898489000 | 12.851566000 | 11.567863000 |
| C | 7.631282000 | 13.070660000 | 12.836329000 |
| C | 8.607679000 | 12.447560000 | 11.851982000 |
| H | 9.584282000 | 12.405822000 | 12.353512000 |
| C | 8.217802000 | 11.011993000 | 11.478416000 |
| H | 8.966717000 | 10.570957000 | 10.811203000 |
| H | 7.253004000 | 10.983952000 | 10.961407000 |
| H | 8.133274000 | 10.378041000 | 12.365408000 |
| C | 8.772518000 | 13.314444000 | 10.596043000 |
| H | 9.520573000 | 12.882464000 | 9.921925000  |
| H | 9.090751000 | 14.329592000 | 10.852197000 |
| H | 7.830027000 | 13.388608000 | 10.042234000 |
| C | 8.077931000 | 13.532219000 | 14.078208000 |
| H | 9.130915000 | 13.420056000 | 14.330609000 |
| C | 7.205779000 | 14.128945000 | 14.997161000 |
| C | 7.697299000 | 14.595771000 | 16.357346000 |
| H | 6.842742000 | 15.066304000 | 16.863382000 |
| C | 8.151413000 | 13.415022000 | 17.227018000 |
| H | 8.447977000 | 13.757782000 | 18.224648000 |
| H | 9.012593000 | 12.906097000 | 16.780505000 |
| H | 7.352227000 | 12.676438000 | 17.341961000 |
| C | 8.803541000 | 15.652778000 | 16.247405000 |
| H | 9.093496000 | 16.013733000 | 17.240423000 |
| H | 8.475069000 | 16.510393000 | 15.653459000 |
| H | 9.700762000 | 15.242332000 | 15.771619000 |
| C | 5.862054000 | 14.262428000 | 14.640799000 |
| H | 5.174057000 | 14.727926000 | 15.340939000 |
| C | 3.585908000 | 11.391300000 | 12.922930000 |
| C | 4.211691000 | 11.038468000 | 14.133152000 |
| H | 4.289769000 | 11.776756000 | 14.928667000 |
| C | 4.796448000 | 9.786260000  | 14.341237000 |
| C | 5.546725000 | 9.502712000  | 15.633262000 |
| H | 5.269423000 | 10.292885000 | 16.343790000 |
| C | 5.178447000 | 8.159389000  | 16.272855000 |
| H | 5.705982000 | 8.033186000  | 17.224403000 |
| H | 5.457628000 | 7.315376000  | 15.632893000 |
| H | 4.104979000 | 8.087186000  | 16.470831000 |
| C | 7.063546000 | 9.594969000  | 15.407596000 |
| H | 7.341649000 | 10.568847000 | 14.994830000 |

## SUPPORTING INFORMATION

---

|   |              |              |              |
|---|--------------|--------------|--------------|
| H | 7.399309000  | 8.821964000  | 14.706703000 |
| H | 7.607041000  | 9.451920000  | 16.348542000 |
| C | 4.727880000  | 8.841186000  | 13.312317000 |
| H | 5.187568000  | 7.865110000  | 13.450387000 |
| C | 4.083527000  | 9.131333000  | 12.104910000 |
| C | 4.010489000  | 8.101831000  | 10.988042000 |
| H | 3.386502000  | 8.535889000  | 10.195365000 |
| C | 5.395103000  | 7.825762000  | 10.384983000 |
| H | 5.321475000  | 7.116294000  | 9.553161000  |
| H | 6.071021000  | 7.394260000  | 11.131605000 |
| H | 5.856999000  | 8.744211000  | 10.010151000 |
| C | 3.340469000  | 6.796376000  | 11.438871000 |
| H | 3.229391000  | 6.112156000  | 10.590306000 |
| H | 2.349209000  | 6.973528000  | 11.867774000 |
| H | 3.942948000  | 6.280757000  | 12.195325000 |
| C | 3.529154000  | 10.402881000 | 11.925880000 |
| H | 3.059040000  | 10.632634000 | 10.977627000 |
| C | 0.772644000  | 12.546922000 | 11.513384000 |
| C | 1.022018000  | 11.935967000 | 10.273103000 |
| H | 2.023081000  | 11.995749000 | 9.852771000  |
| C | 0.017557000  | 11.301611000 | 9.541946000  |
| C | 0.329531000  | 10.640952000 | 8.209728000  |
| H | 1.408746000  | 10.756652000 | 8.040220000  |
| C | -0.396642000 | 11.331329000 | 7.047046000  |
| H | -0.158445000 | 12.398437000 | 7.009043000  |
| H | -1.483614000 | 11.236142000 | 7.146873000  |
| H | -0.111134000 | 10.882141000 | 6.089261000  |
| C | 0.023650000  | 9.137096000  | 8.232194000  |
| H | 0.558373000  | 8.633334000  | 9.043229000  |
| H | 0.316028000  | 8.667561000  | 7.286385000  |
| H | -1.046777000 | 8.952847000  | 8.375579000  |
| C | -1.283247000 | 11.316171000 | 10.057141000 |
| H | -2.088610000 | 10.842121000 | 9.498364000  |
| C | -1.587522000 | 11.953680000 | 11.261637000 |
| C | -3.037598000 | 12.052617000 | 11.708933000 |
| H | -3.606052000 | 11.324272000 | 11.114255000 |
| C | -3.596464000 | 13.446235000 | 11.387904000 |
| H | -4.657196000 | 13.514441000 | 11.655260000 |
| H | -3.493695000 | 13.674834000 | 10.322725000 |



## SUPPORTING INFORMATION

---

|   |              |              |              |
|---|--------------|--------------|--------------|
| H | -3.052072000 | 14.215547000 | 11.944554000 |
| C | -3.255392000 | 11.707043000 | 13.184568000 |
| H | -2.931862000 | 10.683664000 | 13.400324000 |
| H | -4.317119000 | 11.782160000 | 13.442744000 |
| H | -2.706394000 | 12.387215000 | 13.845984000 |
| C | -0.547123000 | 12.555068000 | 11.984445000 |
| H | -0.762990000 | 13.052715000 | 12.927759000 |
| C | 0.919738000  | 15.583405000 | 11.557646000 |
| C | 1.145712000  | 15.983099000 | 10.235030000 |
| H | 2.051656000  | 15.641518000 | 9.741842000  |
| C | 0.237036000  | 16.794244000 | 9.549825000  |
| C | 0.461901000  | 17.178566000 | 8.096663000  |
| H | -0.304081000 | 17.923556000 | 7.840791000  |
| C | 0.255181000  | 15.969583000 | 7.172063000  |
| H | -0.738064000 | 15.531222000 | 7.309940000  |
| H | 0.995173000  | 15.189009000 | 7.380450000  |
| H | 0.359554000  | 16.260063000 | 6.120492000  |
| C | 1.831498000  | 17.824340000 | 7.856516000  |
| H | 1.975497000  | 18.699406000 | 8.496569000  |
| H | 1.927442000  | 18.143256000 | 6.812747000  |
| H | 2.647952000  | 17.124378000 | 8.063161000  |
| C | -0.915613000 | 17.217025000 | 10.219700000 |
| H | -1.622196000 | 17.850654000 | 9.688239000  |
| C | -1.183342000 | 16.835441000 | 11.538424000 |
| C | -2.421023000 | 17.316878000 | 12.281357000 |
| H | -2.627807000 | 16.576400000 | 13.065681000 |
| C | -3.669957000 | 17.417417000 | 11.399846000 |
| H | -4.549914000 | 17.634663000 | 12.014502000 |
| H | -3.855751000 | 16.486946000 | 10.855842000 |
| H | -3.584482000 | 18.225804000 | 10.665303000 |
| C | -2.151914000 | 18.657297000 | 12.982341000 |
| H | -1.310723000 | 18.578857000 | 13.677556000 |
| H | -3.030170000 | 18.985100000 | 13.549914000 |
| H | -1.910161000 | 19.436694000 | 12.251134000 |
| C | -0.255570000 | 16.012675000 | 12.188471000 |
| H | -0.463106000 | 15.695263000 | 13.210302000 |
| C | 3.763138000  | 16.488005000 | 12.594849000 |
| C | 2.957253000  | 17.634629000 | 12.750145000 |
| H | 1.903611000  | 17.506904000 | 12.978571000 |

## SUPPORTING INFORMATION

---

|    |              |              |              |
|----|--------------|--------------|--------------|
| C  | 3.462762000  | 18.925303000 | 12.559010000 |
| C  | 2.584101000  | 20.164072000 | 12.643941000 |
| H  | 3.261255000  | 21.029165000 | 12.637098000 |
| C  | 1.763060000  | 20.245988000 | 13.933554000 |
| H  | 2.406868000  | 20.189605000 | 14.817312000 |
| H  | 1.027748000  | 19.436530000 | 13.990629000 |
| H  | 1.209542000  | 21.190200000 | 13.979564000 |
| C  | 1.677352000  | 20.281081000 | 11.410304000 |
| H  | 2.271827000  | 20.303224000 | 10.491847000 |
| H  | 1.079685000  | 21.199183000 | 11.450977000 |
| H  | 0.991977000  | 19.429873000 | 11.343244000 |
| C  | 4.809605000  | 19.071758000 | 12.217003000 |
| H  | 5.212933000  | 20.071692000 | 12.061822000 |
| C  | 5.642212000  | 17.965278000 | 12.043339000 |
| C  | 7.088474000  | 18.158282000 | 11.617653000 |
| H  | 7.246688000  | 19.240118000 | 11.509191000 |
| C  | 7.369094000  | 17.515209000 | 10.252912000 |
| H  | 8.396018000  | 17.721845000 | 9.930724000  |
| H  | 6.687756000  | 17.899135000 | 9.487232000  |
| H  | 7.245761000  | 16.427978000 | 10.294758000 |
| C  | 8.072043000  | 17.652507000 | 12.680241000 |
| H  | 7.910339000  | 18.160407000 | 13.636655000 |
| H  | 9.107347000  | 17.835324000 | 12.370521000 |
| H  | 7.956274000  | 16.576742000 | 12.849066000 |
| C  | 5.107771000  | 16.688951000 | 12.234453000 |
| H  | 5.740465000  | 15.824048000 | 12.071701000 |
| N  | 2.486817000  | 16.095055000 | 16.547093000 |
| N  | 2.561173000  | 18.111226000 | 18.153231000 |
| Sm | 1.847290000  | 13.841822000 | 15.022651000 |
| H  | -0.454807000 | 13.345945000 | 15.517709000 |
| O  | -1.035611000 | 14.622444000 | 17.885080000 |
| C  | -1.569581000 | 15.151720000 | 16.984978000 |
| O  | -2.092315000 | 15.761309000 | 16.139520000 |

### TS1

|   |              |              |              |
|---|--------------|--------------|--------------|
| C | 0.141791000  | 10.179883000 | 14.419735000 |
| H | 1.048777000  | 10.784299000 | 14.530675000 |
| H | -0.683349000 | 10.860580000 | 14.195452000 |
| C | 0.323024000  | 9.106830000  | 13.316009000 |

## SUPPORTING INFORMATION

---

|   |              |              |              |
|---|--------------|--------------|--------------|
| H | -0.509286000 | 9.127941000  | 12.604759000 |
| H | 1.240444000  | 9.290426000  | 12.751649000 |
| C | 1.092674000  | 8.750521000  | 16.087251000 |
| H | 0.885079000  | 8.226237000  | 17.025576000 |
| H | 1.907926000  | 9.460975000  | 16.265476000 |
| C | 1.434728000  | 7.757214000  | 14.939867000 |
| H | 2.380216000  | 8.025791000  | 14.459978000 |
| H | 1.534673000  | 6.735335000  | 15.322253000 |
| C | -1.252403000 | 8.593733000  | 15.576119000 |
| H | -2.113770000 | 9.181100000  | 15.241225000 |
| H | -1.490366000 | 8.177381000  | 16.559899000 |
| C | -0.898631000 | 7.482245000  | 14.548628000 |
| H | -0.832927000 | 6.502520000  | 15.034846000 |
| H | -1.665230000 | 7.407765000  | 13.769050000 |
| C | -3.017974000 | 10.632494000 | 18.988249000 |
| C | -2.605254000 | 11.928664000 | 19.419464000 |
| C | -1.316349000 | 11.795429000 | 20.050408000 |
| C | -0.955023000 | 10.404046000 | 19.998530000 |
| C | -2.015807000 | 9.685964000  | 19.367979000 |
| C | -4.349247000 | 10.298910000 | 18.420581000 |
| C | -5.527828000 | 10.736014000 | 19.049780000 |
| H | -5.441066000 | 11.340093000 | 19.946625000 |
| C | -6.791637000 | 10.410302000 | 18.549789000 |
| C | -8.079926000 | 10.828917000 | 19.244123000 |
| H | -8.829792000 | 10.970065000 | 18.452688000 |
| C | -7.974309000 | 12.145547000 | 20.015617000 |
| H | -8.962581000 | 12.453574000 | 20.373756000 |
| H | -7.328589000 | 12.043396000 | 20.894683000 |
| H | -7.567008000 | 12.947939000 | 19.394034000 |
| C | -8.591607000 | 9.707127000  | 20.161864000 |
| H | -9.550836000 | 9.980475000  | 20.616339000 |
| H | -8.729510000 | 8.771710000  | 19.611142000 |
| H | -7.877163000 | 9.515829000  | 20.970224000 |
| C | -6.872154000 | 9.633468000  | 17.388039000 |
| H | -7.855572000 | 9.386039000  | 16.991226000 |
| C | -5.725434000 | 9.172107000  | 16.736226000 |
| C | -5.820220000 | 8.317565000  | 15.482626000 |
| H | -4.797697000 | 8.198970000  | 15.098385000 |
| C | -6.650496000 | 8.985550000  | 14.379272000 |

## SUPPORTING INFORMATION

---

|   |              |              |              |
|---|--------------|--------------|--------------|
| H | -6.636363000 | 8.381109000  | 13.465491000 |
| H | -7.697539000 | 9.100020000  | 14.680067000 |
| H | -6.264048000 | 9.980143000  | 14.136896000 |
| C | -6.356095000 | 6.913948000  | 15.797531000 |
| H | -6.373442000 | 6.291143000  | 14.895777000 |
| H | -5.735207000 | 6.415152000  | 16.547237000 |
| H | -7.378116000 | 6.962807000  | 16.189497000 |
| C | -4.479444000 | 9.509225000  | 17.270331000 |
| H | -3.581919000 | 9.143568000  | 16.783818000 |
| C | -3.483713000 | 13.115604000 | 19.237477000 |
| C | -3.965998000 | 13.467714000 | 17.966208000 |
| H | -3.658210000 | 12.878703000 | 17.102577000 |
| C | -4.871820000 | 14.514933000 | 17.769587000 |
| C | -5.419676000 | 14.795725000 | 16.379320000 |
| H | -4.733518000 | 14.323209000 | 15.664345000 |
| C | -5.480487000 | 16.287915000 | 16.036784000 |
| H | -5.791712000 | 16.425204000 | 14.995590000 |
| H | -6.206932000 | 16.818584000 | 16.662110000 |
| H | -4.506020000 | 16.766864000 | 16.166205000 |
| C | -6.796648000 | 14.136667000 | 16.203174000 |
| H | -6.753213000 | 13.064230000 | 16.415431000 |
| H | -7.529888000 | 14.583684000 | 16.884283000 |
| H | -7.164540000 | 14.271539000 | 15.179586000 |
| C | -5.295698000 | 15.243161000 | 18.885755000 |
| H | -5.988070000 | 16.070725000 | 18.752156000 |
| C | -4.864554000 | 14.913369000 | 20.174498000 |
| C | -5.333051000 | 15.704533000 | 21.385194000 |
| H | -4.906307000 | 15.216544000 | 22.272064000 |
| C | -6.858600000 | 15.693875000 | 21.543069000 |
| H | -7.155700000 | 16.224773000 | 22.454334000 |
| H | -7.350944000 | 16.188431000 | 20.698629000 |
| H | -7.244816000 | 14.672410000 | 21.601910000 |
| C | -4.797861000 | 17.143464000 | 21.348303000 |
| H | -5.085664000 | 17.689107000 | 22.253889000 |
| H | -3.706380000 | 17.159572000 | 21.271662000 |
| H | -5.199543000 | 17.690828000 | 20.488261000 |
| C | -3.983772000 | 13.839567000 | 20.330573000 |
| H | -3.717063000 | 13.525387000 | 21.335718000 |
| C | -0.408936000 | 12.827741000 | 20.608369000 |

## SUPPORTING INFORMATION

---

|   |              |              |              |
|---|--------------|--------------|--------------|
| C | -0.848404000 | 13.917290000 | 21.377628000 |
| H | -1.904877000 | 14.045789000 | 21.563479000 |
| C | 0.035753000  | 14.838549000 | 21.942640000 |
| C | -0.496769000 | 15.976713000 | 22.798482000 |
| H | -1.591240000 | 15.887248000 | 22.802960000 |
| C | -0.021016000 | 15.863295000 | 24.253391000 |
| H | -0.293832000 | 14.895030000 | 24.683885000 |
| H | 1.067772000  | 15.963766000 | 24.324065000 |
| H | -0.467451000 | 16.650884000 | 24.870765000 |
| C | -0.151737000 | 17.352925000 | 22.214916000 |
| H | -0.526743000 | 17.454872000 | 21.191356000 |
| H | -0.593620000 | 18.153902000 | 22.818085000 |
| H | 0.931465000  | 17.516924000 | 22.194112000 |
| C | 1.407431000  | 14.666523000 | 21.740326000 |
| H | 2.112809000  | 15.365415000 | 22.187523000 |
| C | 1.898847000  | 13.594454000 | 20.988156000 |
| C | 3.405251000  | 13.404775000 | 20.871166000 |
| H | 3.837307000  | 14.395414000 | 20.662982000 |
| C | 3.984573000  | 12.931607000 | 22.215389000 |
| H | 5.075956000  | 12.844927000 | 22.161270000 |
| H | 3.739222000  | 13.624642000 | 23.025692000 |
| H | 3.575781000  | 11.950781000 | 22.480149000 |
| C | 3.837415000  | 12.458503000 | 19.750079000 |
| H | 3.390730000  | 12.716046000 | 18.783917000 |
| H | 4.927539000  | 12.471527000 | 19.644174000 |
| H | 3.543286000  | 11.427659000 | 19.974081000 |
| C | 0.983943000  | 12.705346000 | 20.420402000 |
| H | 1.363660000  | 11.866618000 | 19.846222000 |
| C | 0.096460000  | 9.777650000  | 20.854824000 |
| C | -0.121306000 | 9.741456000  | 22.236631000 |
| H | -1.041935000 | 10.172572000 | 22.620436000 |
| C | 0.803382000  | 9.168539000  | 23.115811000 |
| C | 0.538729000  | 9.124283000  | 24.611215000 |
| H | 1.416075000  | 8.656400000  | 25.078768000 |
| C | 0.391462000  | 10.529873000 | 25.208948000 |
| H | 1.270587000  | 11.145582000 | 24.995977000 |
| H | -0.482102000 | 11.046533000 | 24.797328000 |
| H | 0.264871000  | 10.476410000 | 26.296090000 |
| C | -0.680948000 | 8.252957000  | 24.942380000 |

## SUPPORTING INFORMATION

---

|   |              |             |              |
|---|--------------|-------------|--------------|
| H | -0.560469000 | 7.237651000 | 24.552301000 |
| H | -0.829197000 | 8.188884000 | 26.026297000 |
| H | -1.594323000 | 8.669667000 | 24.504272000 |
| C | 1.977802000  | 8.630200000 | 22.586619000 |
| H | 2.703285000  | 8.187352000 | 23.266937000 |
| C | 2.243481000  | 8.651045000 | 21.212124000 |
| C | 3.540728000  | 8.076135000 | 20.662446000 |
| H | 3.553729000  | 8.284565000 | 19.583835000 |
| C | 4.779795000  | 8.741797000 | 21.277530000 |
| H | 5.693964000  | 8.354225000 | 20.814040000 |
| H | 4.764525000  | 9.826584000 | 21.143897000 |
| H | 4.846021000  | 8.539766000 | 22.352145000 |
| C | 3.618421000  | 6.554012000 | 20.842842000 |
| H | 2.780587000  | 6.047905000 | 20.356819000 |
| H | 4.547375000  | 6.159895000 | 20.415347000 |
| H | 3.599841000  | 6.282416000 | 21.904216000 |
| C | 1.287830000  | 9.220381000 | 20.363458000 |
| H | 1.487111000  | 9.248959000 | 19.292545000 |
| C | -2.248527000 | 8.224141000 | 19.498453000 |
| C | -1.284503000 | 7.252097000 | 19.176557000 |
| H | -0.331035000 | 7.579304000 | 18.776636000 |
| C | -1.520062000 | 5.889433000 | 19.381866000 |
| C | -0.487088000 | 4.807227000 | 19.104670000 |
| H | -1.035690000 | 3.946974000 | 18.694442000 |
| C | 0.577418000  | 5.193395000 | 18.078842000 |
| H | 0.123839000  | 5.516514000 | 17.136255000 |
| H | 1.216614000  | 6.004724000 | 18.444227000 |
| H | 1.228241000  | 4.339495000 | 17.863503000 |
| C | 0.161858000  | 4.346961000 | 20.420401000 |
| H | -0.590938000 | 3.977773000 | 21.123293000 |
| H | 0.885626000  | 3.542961000 | 20.243444000 |
| H | 0.682028000  | 5.179347000 | 20.905238000 |
| C | -2.748692000 | 5.499257000 | 19.924491000 |
| H | -2.942686000 | 4.439342000 | 20.087389000 |
| C | -3.723256000 | 6.430543000 | 20.280114000 |
| C | -5.028859000 | 5.972342000 | 20.908933000 |
| H | -4.932504000 | 4.893103000 | 21.091904000 |
| C | -5.282664000 | 6.644068000 | 22.264618000 |
| H | -6.188500000 | 6.240662000 | 22.730854000 |

## SUPPORTING INFORMATION

---

|    |              |              |              |
|----|--------------|--------------|--------------|
| H  | -4.444525000 | 6.483697000  | 22.949906000 |
| H  | -5.421394000 | 7.724898000  | 22.154797000 |
| C  | -6.216796000 | 6.175372000  | 19.959658000 |
| H  | -6.073379000 | 5.621457000  | 19.026844000 |
| H  | -7.147925000 | 5.827301000  | 20.421641000 |
| H  | -6.340282000 | 7.232052000  | 19.701792000 |
| C  | -3.459795000 | 7.784072000  | 20.054638000 |
| H  | -4.201315000 | 8.525448000  | 20.333203000 |
| N  | -0.114500000 | 9.530517000  | 15.729159000 |
| N  | 0.387140000  | 7.770163000  | 13.914668000 |
| Sm | -0.507238000 | 11.671093000 | 17.373686000 |
| H  | 1.729104000  | 12.277319000 | 16.788173000 |
| C  | 2.335278000  | 15.696758000 | 17.981077000 |
| H  | 1.355128000  | 15.233208000 | 18.122222000 |
| H  | 3.086017000  | 14.919919000 | 18.154625000 |
| C  | 2.533566000  | 16.909109000 | 18.933151000 |
| H  | 3.465864000  | 16.818638000 | 19.501781000 |
| H  | 1.716309000  | 16.970232000 | 19.657730000 |
| C  | 1.374434000  | 17.117039000 | 16.280253000 |
| H  | 1.557619000  | 17.509398000 | 15.275921000 |
| H  | 0.410388000  | 16.599124000 | 16.258838000 |
| C  | 1.385181000  | 18.251604000 | 17.341933000 |
| H  | 0.513553000  | 18.187536000 | 18.002525000 |
| H  | 1.359896000  | 19.235328000 | 16.861294000 |
| C  | 3.746559000  | 16.840226000 | 16.413696000 |
| H  | 4.532610000  | 16.146918000 | 16.728178000 |
| H  | 3.898994000  | 17.064989000 | 15.353955000 |
| C  | 3.761200000  | 18.122576000 | 17.291554000 |
| H  | 3.750463000  | 19.024592000 | 16.670266000 |
| H  | 4.664179000  | 18.166020000 | 17.910930000 |
| C  | 3.931797000  | 13.924691000 | 13.032175000 |
| C  | 3.112295000  | 12.791659000 | 12.723721000 |
| C  | 1.863579000  | 13.284599000 | 12.214902000 |
| C  | 1.916723000  | 14.710115000 | 12.236428000 |
| C  | 3.207604000  | 15.116527000 | 12.706934000 |
| C  | 5.364417000  | 13.812985000 | 13.420119000 |
| C  | 6.268003000  | 13.206499000 | 12.536425000 |
| H  | 5.889883000  | 12.838302000 | 11.586675000 |
| C  | 7.625393000  | 13.073829000 | 12.848438000 |

## SUPPORTING INFORMATION

---

|   |             |              |              |
|---|-------------|--------------|--------------|
| C | 8.600602000 | 12.441889000 | 11.868543000 |
| H | 9.578239000 | 12.406579000 | 12.368518000 |
| C | 8.211894000 | 11.002147000 | 11.510362000 |
| H | 8.960496000 | 10.555082000 | 10.846815000 |
| H | 7.246568000 | 10.967912000 | 10.994730000 |
| H | 8.129048000 | 10.377281000 | 12.403914000 |
| C | 8.761808000 | 13.295945000 | 10.603360000 |
| H | 9.509124000 | 12.857912000 | 9.932347000  |
| H | 9.079225000 | 14.314121000 | 10.848265000 |
| H | 7.818159000 | 13.363086000 | 10.050640000 |
| C | 8.074591000 | 13.550269000 | 14.083792000 |
| H | 9.128420000 | 13.442765000 | 14.334654000 |
| C | 7.204046000 | 14.156516000 | 14.997935000 |
| C | 7.698573000 | 14.641208000 | 16.350733000 |
| H | 6.844480000 | 15.115855000 | 16.853686000 |
| C | 8.158887000 | 13.472555000 | 17.233409000 |
| H | 8.457199000 | 13.828459000 | 18.225888000 |
| H | 9.020494000 | 12.961071000 | 16.790662000 |
| H | 7.362489000 | 12.732820000 | 17.359832000 |
| C | 8.801664000 | 15.699638000 | 16.224082000 |
| H | 9.094822000 | 16.072542000 | 17.211723000 |
| H | 8.468427000 | 16.549598000 | 15.621874000 |
| H | 9.697870000 | 15.286005000 | 15.749131000 |
| C | 5.859291000 | 14.284052000 | 14.643361000 |
| H | 5.172981000 | 14.758662000 | 15.338903000 |
| C | 3.579201000 | 11.396195000 | 12.944090000 |
| C | 4.199586000 | 11.044569000 | 14.157164000 |
| H | 4.271180000 | 11.782595000 | 14.953528000 |
| C | 4.785727000 | 9.793341000  | 14.368036000 |
| C | 5.528420000 | 9.511270000  | 15.664776000 |
| H | 5.231931000 | 10.291338000 | 16.378749000 |
| C | 5.176601000 | 8.157134000  | 16.290519000 |
| H | 5.693093000 | 8.034715000  | 17.248548000 |
| H | 5.481018000 | 7.322643000  | 15.649561000 |
| H | 4.102026000 | 8.062861000  | 16.472782000 |
| C | 7.045606000 | 9.629630000  | 15.453980000 |
| H | 7.311961000 | 10.610362000 | 15.049835000 |
| H | 7.400039000 | 8.866543000  | 14.751384000 |
| H | 7.582612000 | 9.489186000  | 16.399047000 |



## SUPPORTING INFORMATION

---

|   |              |              |              |
|---|--------------|--------------|--------------|
| C | 4.725133000  | 8.848846000  | 13.338165000 |
| H | 5.186178000  | 7.873767000  | 13.478270000 |
| C | 4.086237000  | 9.137836000  | 12.127477000 |
| C | 4.020239000  | 8.107937000  | 11.010452000 |
| H | 3.403345000  | 8.542711000  | 10.212623000 |
| C | 5.408790000  | 7.828438000  | 10.418254000 |
| H | 5.339904000  | 7.118028000  | 9.586856000  |
| H | 6.078409000  | 7.396542000  | 11.170304000 |
| H | 5.875192000  | 8.745437000  | 10.045574000 |
| C | 3.344085000  | 6.804130000  | 11.456908000 |
| H | 3.240083000  | 6.118787000  | 10.608343000 |
| H | 2.349019000  | 6.983167000  | 11.876154000 |
| H | 3.938780000  | 6.288932000  | 12.219792000 |
| C | 3.529652000  | 10.408067000 | 11.946327000 |
| H | 3.063901000  | 10.637262000 | 10.995768000 |
| C | 0.765935000  | 12.546789000 | 11.530436000 |
| C | 1.018311000  | 11.933322000 | 10.291941000 |
| H | 2.020080000  | 11.993139000 | 9.873332000  |
| C | 0.015790000  | 11.296858000 | 9.559906000  |
| C | 0.331164000  | 10.633130000 | 8.230011000  |
| H | 1.410571000  | 10.749740000 | 8.062303000  |
| C | -0.393532000 | 11.319356000 | 7.063973000  |
| H | -0.156805000 | 12.386695000 | 7.023654000  |
| H | -1.480579000 | 11.222816000 | 7.161625000  |
| H | -0.105269000 | 10.868051000 | 6.108008000  |
| C | 0.027184000  | 9.128930000  | 8.255969000  |
| H | 0.561065000  | 8.628026000  | 9.069332000  |
| H | 0.321877000  | 8.657199000  | 7.311971000  |
| H | -1.043277000 | 8.943723000  | 8.397886000  |
| C | -1.286258000 | 11.312275000 | 10.071966000 |
| H | -2.090232000 | 10.836991000 | 9.512230000  |
| C | -1.593432000 | 11.952424000 | 11.274357000 |
| C | -3.044486000 | 12.052806000 | 11.718038000 |
| H | -3.612306000 | 11.324913000 | 11.122201000 |
| C | -3.601123000 | 13.446998000 | 11.395499000 |
| H | -4.662579000 | 13.516101000 | 11.659677000 |
| H | -3.494965000 | 13.675460000 | 10.330623000 |
| H | -3.057806000 | 14.215792000 | 11.953894000 |
| C | -3.265948000 | 11.707917000 | 13.193303000 |

## SUPPORTING INFORMATION

---

|   |              |              |              |
|---|--------------|--------------|--------------|
| H | -2.944962000 | 10.683865000 | 13.409987000 |
| H | -4.328000000 | 11.785125000 | 13.449459000 |
| H | -2.717028000 | 12.387425000 | 13.855427000 |
| C | -0.554834000 | 12.555241000 | 11.998574000 |
| H | -0.772184000 | 13.054144000 | 12.940859000 |
| C | 0.916273000  | 15.584684000 | 11.561254000 |
| C | 1.148285000  | 15.975062000 | 10.236892000 |
| H | 2.055178000  | 15.628115000 | 9.749189000  |
| C | 0.244410000  | 16.784100000 | 9.542973000  |
| C | 0.476870000  | 17.159205000 | 8.088594000  |
| H | -0.289256000 | 17.900688000 | 7.823197000  |
| C | 0.278682000  | 15.943812000 | 7.170609000  |
| H | -0.714481000 | 15.504219000 | 7.305123000  |
| H | 1.019013000  | 15.166203000 | 7.388691000  |
| H | 0.389052000  | 16.227661000 | 6.117841000  |
| C | 1.846463000  | 17.806719000 | 7.852867000  |
| H | 1.984208000  | 18.686346000 | 8.488053000  |
| H | 1.948457000  | 18.118952000 | 6.807640000  |
| H | 2.663178000  | 17.110109000 | 8.069608000  |
| C | -0.909806000 | 17.213870000 | 10.205555000 |
| H | -1.612933000 | 17.845645000 | 9.667312000  |
| C | -1.183226000 | 16.841812000 | 11.525827000 |
| C | -2.422536000 | 17.331034000 | 12.260847000 |
| H | -2.631065000 | 16.598697000 | 13.052181000 |
| C | -3.669330000 | 17.422313000 | 11.375230000 |
| H | -4.550710000 | 17.646689000 | 11.985297000 |
| H | -3.854185000 | 16.485887000 | 10.841211000 |
| H | -3.581833000 | 18.222431000 | 10.631922000 |
| C | -2.154946000 | 18.678797000 | 12.948235000 |
| H | -1.314211000 | 18.608210000 | 13.644896000 |
| H | -3.033950000 | 19.011877000 | 13.511581000 |
| H | -1.913078000 | 19.450897000 | 12.209339000 |
| C | -0.259885000 | 16.021362000 | 12.185122000 |
| H | -0.472078000 | 15.712460000 | 13.208446000 |
| C | 3.758360000  | 16.490551000 | 12.592570000 |
| C | 2.956311000  | 17.639373000 | 12.750597000 |
| H | 1.904932000  | 17.515062000 | 12.991340000 |
| C | 3.462302000  | 18.927827000 | 12.545495000 |
| C | 2.587654000  | 20.169463000 | 12.630380000 |

## SUPPORTING INFORMATION

---

|    |              |              |              |
|----|--------------|--------------|--------------|
| H  | 3.267221000  | 21.032492000 | 12.612249000 |
| C  | 1.777849000  | 20.262608000 | 13.926241000 |
| H  | 2.428679000  | 20.207417000 | 14.804922000 |
| H  | 1.038414000  | 19.457728000 | 13.993880000 |
| H  | 1.229910000  | 21.210082000 | 13.971664000 |
| C  | 1.670911000  | 20.281322000 | 11.403658000 |
| H  | 2.257607000  | 20.295418000 | 10.480078000 |
| H  | 1.076625000  | 21.201652000 | 11.443374000 |
| H  | 0.982239000  | 19.431993000 | 11.348005000 |
| C  | 4.805642000  | 19.069213000 | 12.187865000 |
| H  | 5.209011000  | 20.067358000 | 12.021697000 |
| C  | 5.634333000  | 17.960190000 | 12.011880000 |
| C  | 7.076025000  | 18.147599000 | 11.568612000 |
| H  | 7.234331000  | 19.228232000 | 11.448870000 |
| C  | 7.340952000  | 17.492205000 | 10.206588000 |
| H  | 8.364135000  | 17.695789000 | 9.870903000  |
| H  | 6.650940000  | 17.869408000 | 9.445355000  |
| H  | 7.218129000  | 16.405372000 | 10.259425000 |
| C  | 8.070717000  | 17.650127000 | 12.624779000 |
| H  | 7.920394000  | 18.166949000 | 13.578242000 |
| H  | 9.102722000  | 17.828801000 | 12.301906000 |
| H  | 7.955525000  | 16.576087000 | 12.804685000 |
| C  | 5.099344000  | 16.686240000 | 12.216459000 |
| H  | 5.728065000  | 15.818799000 | 12.051444000 |
| N  | 2.449317000  | 16.137715000 | 16.568851000 |
| N  | 2.588649000  | 18.156576000 | 18.168426000 |
| Sm | 1.847016000  | 13.867633000 | 15.032460000 |
| H  | -0.470357000 | 13.341122000 | 15.488404000 |
| O  | -0.996658000 | 14.457091000 | 17.790724000 |
| C  | -1.471833000 | 14.942262000 | 16.827826000 |
| O  | -1.987840000 | 15.578955000 | 15.995822000 |

### Int2

|   |              |              |              |
|---|--------------|--------------|--------------|
| C | 0.146106000  | 9.791669000  | 14.423111000 |
| H | 1.048435000  | 10.381395000 | 14.620395000 |
| H | -0.653510000 | 10.482150000 | 14.140958000 |
| C | 0.403712000  | 8.724587000  | 13.324650000 |
| H | -0.274911000 | 8.859389000  | 12.476778000 |
| H | 1.423714000  | 8.805873000  | 12.940242000 |

## SUPPORTING INFORMATION

---

|   |              |              |              |
|---|--------------|--------------|--------------|
| C | 0.852490000  | 8.232466000  | 16.106162000 |
| H | 0.558945000  | 7.754809000  | 17.045565000 |
| H | 1.737051000  | 8.849550000  | 16.300566000 |
| C | 1.130140000  | 7.184022000  | 14.991042000 |
| H | 2.153459000  | 7.277324000  | 14.614148000 |
| H | 1.006093000  | 6.163191000  | 15.369947000 |
| C | -1.459924000 | 8.314623000  | 15.447468000 |
| H | -2.260978000 | 8.995332000  | 15.139169000 |
| H | -1.756404000 | 7.853111000  | 16.395655000 |
| C | -1.164536000 | 7.250424000  | 14.350930000 |
| H | -1.303246000 | 6.235429000  | 14.739765000 |
| H | -1.840260000 | 7.366126000  | 13.496345000 |
| C | -2.767566000 | 10.886281000 | 19.292700000 |
| C | -2.047200000 | 12.050794000 | 19.716502000 |
| C | -0.801992000 | 11.611303000 | 20.267603000 |
| C | -0.760306000 | 10.189332000 | 20.192364000 |
| C | -1.977135000 | 9.732982000  | 19.591704000 |
| C | -4.172418000 | 10.884847000 | 18.809226000 |
| C | -5.180520000 | 11.412375000 | 19.632241000 |
| H | -4.894395000 | 11.812431000 | 20.599570000 |
| C | -6.517886000 | 11.434664000 | 19.230539000 |
| C | -7.632966000 | 11.955776000 | 20.126006000 |
| H | -8.363342000 | 12.444345000 | 19.464892000 |
| C | -7.178089000 | 12.993110000 | 21.155231000 |
| H | -8.046117000 | 13.423549000 | 21.665517000 |
| H | -6.541786000 | 12.543519000 | 21.925735000 |
| H | -6.615262000 | 13.808428000 | 20.691184000 |
| C | -8.355867000 | 10.790474000 | 20.821020000 |
| H | -9.203096000 | 11.153769000 | 21.413802000 |
| H | -8.733792000 | 10.063787000 | 20.095335000 |
| H | -7.673036000 | 10.263065000 | 21.496406000 |
| C | -6.840354000 | 10.924383000 | 17.966934000 |
| H | -7.878630000 | 10.957203000 | 17.639614000 |
| C | -5.867285000 | 10.385266000 | 17.120607000 |
| C | -6.227969000 | 9.873454000  | 15.735721000 |
| H | -5.309575000 | 9.458965000  | 15.298446000 |
| C | -6.697055000 | 11.017195000 | 14.825119000 |
| H | -6.904494000 | 10.650536000 | 13.813395000 |
| H | -7.616830000 | 11.473006000 | 15.208167000 |

## SUPPORTING INFORMATION

---

|   |              |              |              |
|---|--------------|--------------|--------------|
| H | -5.939493000 | 11.803744000 | 14.756507000 |
| C | -7.267568000 | 8.746621000  | 15.777901000 |
| H | -7.462994000 | 8.362615000  | 14.770395000 |
| H | -6.925731000 | 7.914718000  | 16.400145000 |
| H | -8.221134000 | 9.098817000  | 16.186359000 |
| C | -4.541069000 | 10.363933000 | 17.563037000 |
| H | -3.776835000 | 9.943968000  | 16.913295000 |
| C | -2.567532000 | 13.437265000 | 19.667302000 |
| C | -3.308104000 | 13.901798000 | 18.565602000 |
| H | -3.456362000 | 13.247191000 | 17.710970000 |
| C | -3.895760000 | 15.169811000 | 18.550770000 |
| C | -4.760700000 | 15.591234000 | 17.372540000 |
| H | -4.626348000 | 14.831303000 | 16.591191000 |
| C | -4.349295000 | 16.942277000 | 16.777249000 |
| H | -4.961079000 | 17.182229000 | 15.900612000 |
| H | -4.476075000 | 17.757514000 | 17.497985000 |
| H | -3.300631000 | 16.932880000 | 16.464223000 |
| C | -6.248180000 | 15.592387000 | 17.753653000 |
| H | -6.556725000 | 14.608794000 | 18.118859000 |
| H | -6.450981000 | 16.325496000 | 18.542515000 |
| H | -6.872497000 | 15.848171000 | 16.889892000 |
| C | -3.720770000 | 16.004145000 | 19.660673000 |
| H | -4.189021000 | 16.986120000 | 19.671237000 |
| C | -2.973464000 | 15.587427000 | 20.768691000 |
| C | -2.829867000 | 16.469489000 | 21.999198000 |
| H | -2.131044000 | 15.959447000 | 22.675281000 |
| C | -4.168477000 | 16.610559000 | 22.738788000 |
| H | -4.046449000 | 17.194566000 | 23.657980000 |
| H | -4.910691000 | 17.121424000 | 22.115061000 |
| H | -4.577477000 | 15.631736000 | 23.007397000 |
| C | -2.236316000 | 17.846377000 | 21.678041000 |
| H | -2.098226000 | 18.429750000 | 22.595210000 |
| H | -1.264340000 | 17.756603000 | 21.184333000 |
| H | -2.893376000 | 18.424380000 | 21.018849000 |
| C | -2.405520000 | 14.311132000 | 20.755222000 |
| H | -1.849641000 | 13.974234000 | 21.624567000 |
| C | 0.177627000  | 12.406495000 | 21.059691000 |
| C | 0.119850000  | 12.317274000 | 22.458709000 |
| H | -0.646203000 | 11.689621000 | 22.907787000 |

## SUPPORTING INFORMATION

---

|   |              |              |              |
|---|--------------|--------------|--------------|
| C | 1.019035000  | 12.997648000 | 23.280847000 |
| C | 0.932226000  | 12.865725000 | 24.792018000 |
| H | 0.046463000  | 12.253794000 | 25.008188000 |
| C | 2.151526000  | 12.126914000 | 25.361352000 |
| H | 2.271336000  | 11.145996000 | 24.891841000 |
| H | 3.073113000  | 12.694694000 | 25.190208000 |
| H | 2.047794000  | 11.980647000 | 26.442452000 |
| C | 0.735871000  | 14.222140000 | 25.481417000 |
| H | -0.152276000 | 14.736065000 | 25.100765000 |
| H | 0.617704000  | 14.093072000 | 26.562952000 |
| H | 1.596524000  | 14.880625000 | 25.319921000 |
| C | 2.006622000  | 13.781460000 | 22.675347000 |
| H | 2.722720000  | 14.310158000 | 23.301182000 |
| C | 2.101717000  | 13.893482000 | 21.285581000 |
| C | 3.212254000  | 14.713289000 | 20.650031000 |
| H | 3.026211000  | 14.723603000 | 19.567122000 |
| C | 3.218167000  | 16.168389000 | 21.136426000 |
| H | 3.976788000  | 16.752678000 | 20.603502000 |
| H | 2.245800000  | 16.647076000 | 20.984518000 |
| H | 3.450903000  | 16.230911000 | 22.204933000 |
| C | 4.583038000  | 14.059905000 | 20.875295000 |
| H | 4.600202000  | 13.035800000 | 20.490576000 |
| H | 5.375074000  | 14.627535000 | 20.375079000 |
| H | 4.825466000  | 14.017989000 | 21.942877000 |
| C | 1.177382000  | 13.203549000 | 20.491431000 |
| H | 1.259782000  | 13.266922000 | 19.406634000 |
| C | 0.244688000  | 9.365510000  | 20.909438000 |
| C | -0.172256000 | 8.494738000  | 21.926139000 |
| H | -1.236415000 | 8.404017000  | 22.125447000 |
| C | 0.744015000  | 7.766749000  | 22.691209000 |
| C | 0.278034000  | 6.849280000  | 23.810236000 |
| H | 1.180358000  | 6.438214000  | 24.283698000 |
| C | -0.497668000 | 7.614950000  | 24.890849000 |
| H | 0.094102000  | 8.444564000  | 25.289995000 |
| H | -1.429529000 | 8.030660000  | 24.492510000 |
| H | -0.760159000 | 6.951241000  | 25.722268000 |
| C | -0.543709000 | 5.667880000  | 23.277132000 |
| H | 0.036157000  | 5.072089000  | 22.565412000 |
| H | -0.853508000 | 5.009453000  | 24.096759000 |

## SUPPORTING INFORMATION

---

|   |              |              |              |
|---|--------------|--------------|--------------|
| H | -1.446313000 | 6.012166000  | 22.761838000 |
| C | 2.106390000  | 7.914761000  | 22.417792000 |
| H | 2.823736000  | 7.355167000  | 23.015624000 |
| C | 2.563689000  | 8.769558000  | 21.408283000 |
| C | 4.049464000  | 8.944878000  | 21.145080000 |
| H | 4.143219000  | 9.564139000  | 20.242264000 |
| C | 4.732567000  | 9.700348000  | 22.294271000 |
| H | 5.791325000  | 9.876000000  | 22.071741000 |
| H | 4.252722000  | 10.667481000 | 22.470098000 |
| H | 4.678528000  | 9.126122000  | 23.226009000 |
| C | 4.757734000  | 7.612556000  | 20.868225000 |
| H | 4.281553000  | 7.070552000  | 20.045277000 |
| H | 5.808529000  | 7.779903000  | 20.606204000 |
| H | 4.741720000  | 6.959733000  | 21.747897000 |
| C | 1.621216000  | 9.485627000  | 20.666674000 |
| H | 1.967646000  | 10.172442000 | 19.896347000 |
| C | -2.397402000 | 8.313676000  | 19.522198000 |
| C | -1.474847000 | 7.291216000  | 19.220366000 |
| H | -0.450492000 | 7.570368000  | 18.996040000 |
| C | -1.824703000 | 5.941558000  | 19.279566000 |
| C | -0.847732000 | 4.811527000  | 18.984413000 |
| H | -1.063173000 | 4.022262000  | 19.718999000 |
| C | -1.104761000 | 4.212654000  | 17.592961000 |
| H | -2.144872000 | 3.892351000  | 17.479345000 |
| H | -0.899270000 | 4.954172000  | 16.812511000 |
| H | -0.458579000 | 3.346238000  | 17.412218000 |
| C | 0.625647000  | 5.188367000  | 19.145827000 |
| H | 0.822169000  | 5.662878000  | 20.111582000 |
| H | 1.254617000  | 4.295380000  | 19.066172000 |
| H | 0.954195000  | 5.880768000  | 18.362545000 |
| C | -3.138979000 | 5.611341000  | 19.634155000 |
| H | -3.422296000 | 4.561202000  | 19.699414000 |
| C | -4.086360000 | 6.590492000  | 19.931972000 |
| C | -5.493085000 | 6.192771000  | 20.346713000 |
| H | -5.515878000 | 5.094930000  | 20.385048000 |
| C | -5.847190000 | 6.706902000  | 21.748506000 |
| H | -6.839026000 | 6.353072000  | 22.051377000 |
| H | -5.120849000 | 6.363057000  | 22.491663000 |
| H | -5.862749000 | 7.801533000  | 21.778568000 |

## SUPPORTING INFORMATION

---

|    |              |              |              |
|----|--------------|--------------|--------------|
| C  | -6.535721000 | 6.640386000  | 19.314159000 |
| H  | -6.312776000 | 6.222423000  | 18.327221000 |
| H  | -7.539045000 | 6.308673000  | 19.604751000 |
| H  | -6.555786000 | 7.730973000  | 19.218305000 |
| C  | -3.702139000 | 7.934793000  | 19.870907000 |
| H  | -4.416940000 | 8.707134000  | 20.134498000 |
| N  | -0.247937000 | 9.131352000  | 15.692723000 |
| N  | 0.211154000  | 7.377145000  | 13.868515000 |
| Sm | -0.629790000 | 11.214868000 | 17.414350000 |
| H  | 1.175712000  | 12.520393000 | 16.550879000 |
| C  | 0.278520000  | 15.752709000 | 17.334508000 |
| H  | -0.637816000 | 15.206072000 | 17.089356000 |
| H  | 0.960685000  | 15.044060000 | 17.814847000 |
| C  | -0.018814000 | 16.980633000 | 18.238951000 |
| H  | 0.527461000  | 16.911500000 | 19.185167000 |
| H  | -1.084133000 | 17.036337000 | 18.482108000 |
| C  | -0.047545000 | 17.116171000 | 15.384003000 |
| H  | 0.414417000  | 17.434886000 | 14.445008000 |
| H  | -0.944936000 | 16.540782000 | 15.135005000 |
| C  | -0.359024000 | 18.330576000 | 16.305807000 |
| H  | -1.427543000 | 18.389011000 | 16.537488000 |
| H  | -0.077907000 | 19.272367000 | 15.822927000 |
| C  | 2.138585000  | 16.947807000 | 16.375112000 |
| H  | 2.829012000  | 16.258846000 | 16.876100000 |
| H  | 2.596156000  | 17.254319000 | 15.427804000 |
| C  | 1.808844000  | 18.171794000 | 17.277577000 |
| H  | 2.095336000  | 19.109262000 | 16.788097000 |
| H  | 2.351161000  | 18.120306000 | 18.227968000 |
| C  | 3.646660000  | 13.970249000 | 12.954546000 |
| C  | 2.979025000  | 12.748523000 | 12.623272000 |
| C  | 1.798595000  | 13.083935000 | 11.879816000 |
| C  | 1.739908000  | 14.504383000 | 11.770544000 |
| C  | 2.895246000  | 15.058419000 | 12.407022000 |
| C  | 4.976340000  | 14.073500000 | 13.603880000 |
| C  | 6.072310000  | 13.375530000 | 13.076142000 |
| H  | 5.910311000  | 12.739787000 | 12.209970000 |
| C  | 7.355314000  | 13.502651000 | 13.618970000 |
| C  | 8.543771000  | 12.783387000 | 13.001615000 |
| H  | 9.429200000  | 13.067859000 | 13.586562000 |



## SUPPORTING INFORMATION

---

|   |             |              |              |
|---|-------------|--------------|--------------|
| C | 8.402556000 | 11.258726000 | 13.088511000 |
| H | 9.279727000 | 10.763324000 | 12.657290000 |
| H | 7.517900000 | 10.909549000 | 12.546181000 |
| H | 8.302581000 | 10.930888000 | 14.127053000 |
| C | 8.788613000 | 13.230467000 | 11.553682000 |
| H | 9.684522000 | 12.748580000 | 11.146582000 |
| H | 8.926536000 | 14.314220000 | 11.490346000 |
| H | 7.945780000 | 12.962444000 | 10.907205000 |
| C | 7.529178000 | 14.325896000 | 14.735000000 |
| H | 8.524934000 | 14.423301000 | 15.163956000 |
| C | 6.458756000 | 15.026723000 | 15.304027000 |
| C | 6.661504000 | 15.911551000 | 16.522902000 |
| H | 5.670189000 | 16.283349000 | 16.816970000 |
| C | 7.231779000 | 15.126999000 | 17.711737000 |
| H | 7.311551000 | 15.768742000 | 18.596387000 |
| H | 8.234872000 | 14.745455000 | 17.492421000 |
| H | 6.599729000 | 14.270360000 | 17.964708000 |
| C | 7.533769000 | 17.132946000 | 16.204814000 |
| H | 7.632198000 | 17.779408000 | 17.084180000 |
| H | 7.103382000 | 17.723363000 | 15.391314000 |
| H | 8.541287000 | 16.829452000 | 15.900013000 |
| C | 5.197515000 | 14.896568000 | 14.719344000 |
| H | 4.366741000 | 15.467496000 | 15.129220000 |
| C | 3.480144000 | 11.414312000 | 13.044413000 |
| C | 3.841757000 | 11.181647000 | 14.380489000 |
| H | 3.697135000 | 11.968364000 | 15.119297000 |
| C | 4.413938000 | 9.977012000  | 14.807903000 |
| C | 4.820040000 | 9.836863000  | 16.268608000 |
| H | 4.011871000 | 10.288887000 | 16.862522000 |
| C | 4.990676000 | 8.391306000  | 16.738630000 |
| H | 5.171550000 | 8.363782000  | 17.817294000 |
| H | 5.849207000 | 7.910646000  | 16.256161000 |
| H | 4.105312000 | 7.781643000  | 16.531117000 |
| C | 6.097876000 | 10.640418000 | 16.558929000 |
| H | 6.000082000 | 11.684398000 | 16.248802000 |
| H | 6.948423000 | 10.211616000 | 16.017970000 |
| H | 6.334149000 | 10.618753000 | 17.628884000 |
| C | 4.622290000 | 8.970282000  | 13.862866000 |
| H | 5.075231000 | 8.031196000  | 14.168668000 |

## SUPPORTING INFORMATION

---

|   |              |              |              |
|---|--------------|--------------|--------------|
| C | 4.264966000  | 9.151196000  | 12.519237000 |
| C | 4.528123000  | 8.067631000  | 11.484889000 |
| H | 4.071576000  | 8.407231000  | 10.545637000 |
| C | 6.032506000  | 7.895290000  | 11.229928000 |
| H | 6.211669000  | 7.148660000  | 10.448166000 |
| H | 6.549751000  | 7.560657000  | 12.136089000 |
| H | 6.491896000  | 8.836667000  | 10.913216000 |
| C | 3.880591000  | 6.725798000  | 11.851098000 |
| H | 4.039718000  | 5.993553000  | 11.051791000 |
| H | 2.802065000  | 6.824481000  | 12.008028000 |
| H | 4.315491000  | 6.307158000  | 12.765753000 |
| C | 3.698587000  | 10.366896000 | 12.131332000 |
| H | 3.440896000  | 10.512344000 | 11.089199000 |
| C | 0.897468000  | 12.181313000 | 11.109728000 |
| C | 1.401952000  | 11.537606000 | 9.966623000  |
| H | 2.440364000  | 11.704669000 | 9.690110000  |
| C | 0.603400000  | 10.739119000 | 9.149447000  |
| C | 1.185472000  | 10.057863000 | 7.922533000  |
| H | 2.257784000  | 10.295810000 | 7.902316000  |
| C | 0.568735000  | 10.599143000 | 6.625404000  |
| H | 0.692807000  | 11.683566000 | 6.550646000  |
| H | -0.504184000 | 10.382654000 | 6.577520000  |
| H | 1.039915000  | 10.138977000 | 5.749604000  |
| C | 1.052039000  | 8.530867000  | 7.998841000  |
| H | 1.512027000  | 8.135528000  | 8.909704000  |
| H | 1.534990000  | 8.056022000  | 7.137565000  |
| H | 0.000332000  | 8.223545000  | 7.998228000  |
| C | -0.751518000 | 10.609976000 | 9.475436000  |
| H | -1.401314000 | 10.006809000 | 8.843546000  |
| C | -1.305719000 | 11.262276000 | 10.577442000 |
| C | -2.801101000 | 11.159685000 | 10.835144000 |
| H | -3.213235000 | 10.516328000 | 10.045837000 |
| C | -3.483867000 | 12.527547000 | 10.712341000 |
| H | -4.568327000 | 12.434877000 | 10.839366000 |
| H | -3.288683000 | 12.973478000 | 9.732769000  |
| H | -3.112994000 | 13.223715000 | 11.471792000 |
| C | -3.135750000 | 10.497491000 | 12.176299000 |
| H | -2.692125000 | 9.499038000  | 12.244000000 |
| H | -4.219835000 | 10.392647000 | 12.294953000 |

## SUPPORTING INFORMATION

---

|   |              |              |              |
|---|--------------|--------------|--------------|
| H | -2.769388000 | 11.089240000 | 13.021474000 |
| C | -0.466496000 | 12.037185000 | 11.393263000 |
| H | -0.883189000 | 12.565410000 | 12.247166000 |
| C | 0.812390000  | 15.252191000 | 10.876627000 |
| C | 1.257380000  | 15.622432000 | 9.602564000  |
| H | 2.265082000  | 15.343356000 | 9.306660000  |
| C | 0.439987000  | 16.332571000 | 8.717945000  |
| C | 0.915428000  | 16.684512000 | 7.317860000  |
| H | 0.139569000  | 17.317318000 | 6.865075000  |
| C | 1.048240000  | 15.426404000 | 6.447152000  |
| H | 0.105736000  | 14.871455000 | 6.407625000  |
| H | 1.814561000  | 14.752991000 | 6.846647000  |
| H | 1.334242000  | 15.689636000 | 5.422466000  |
| C | 2.221147000  | 17.488617000 | 7.322586000  |
| H | 2.119951000  | 18.405327000 | 7.910333000  |
| H | 2.506286000  | 17.765473000 | 6.301445000  |
| H | 3.046312000  | 16.910748000 | 7.751877000  |
| C | -0.844523000 | 16.686861000 | 9.139041000  |
| H | -1.480054000 | 17.248150000 | 8.456572000  |
| C | -1.329131000 | 16.330045000 | 10.402390000 |
| C | -2.717274000 | 16.746969000 | 10.863038000 |
| H | -2.943864000 | 16.159101000 | 11.762992000 |
| C | -3.810932000 | 16.449076000 | 9.830410000  |
| H | -4.799504000 | 16.679628000 | 10.242601000 |
| H | -3.802947000 | 15.397245000 | 9.531932000  |
| H | -3.687344000 | 17.054980000 | 8.926188000  |
| C | -2.745101000 | 18.230121000 | 11.261817000 |
| H | -2.009003000 | 18.445989000 | 12.042245000 |
| H | -3.734076000 | 18.516555000 | 11.637732000 |
| H | -2.514607000 | 18.869158000 | 10.402016000 |
| C | -0.490400000 | 15.605317000 | 11.255985000 |
| H | -0.862507000 | 15.305826000 | 12.234334000 |
| C | 3.380234000  | 16.447696000 | 12.208632000 |
| C | 2.528084000  | 17.565885000 | 12.268680000 |
| H | 1.479276000  | 17.409038000 | 12.503670000 |
| C | 2.986535000  | 18.854954000 | 11.975362000 |
| C | 2.073151000  | 20.071170000 | 11.961796000 |
| H | 2.726387000  | 20.952216000 | 12.029171000 |
| C | 1.106375000  | 20.136882000 | 13.145955000 |

## SUPPORTING INFORMATION

---

|    |              |              |              |
|----|--------------|--------------|--------------|
| H  | 1.638809000  | 20.050828000 | 14.098876000 |
| H  | 0.358259000  | 19.338567000 | 13.096587000 |
| H  | 0.563164000  | 21.088057000 | 13.145361000 |
| C  | 1.310968000  | 20.166645000 | 10.631472000 |
| H  | 2.005333000  | 20.215120000 | 9.787126000  |
| H  | 0.680228000  | 21.062920000 | 10.605302000 |
| H  | 0.669328000  | 19.291510000 | 10.485293000 |
| C  | 4.326464000  | 19.019993000 | 11.612607000 |
| H  | 4.690584000  | 20.018526000 | 11.373207000 |
| C  | 5.201164000  | 17.936096000 | 11.521720000 |
| C  | 6.634443000  | 18.144943000 | 11.060472000 |
| H  | 6.734072000  | 19.208409000 | 10.802852000 |
| C  | 6.950018000  | 17.336793000 | 9.794622000  |
| H  | 7.961182000  | 17.559717000 | 9.435960000  |
| H  | 6.244151000  | 17.568373000 | 8.990900000  |
| H  | 6.896469000  | 16.259834000 | 9.986249000  |
| C  | 7.645748000  | 17.843931000 | 12.173502000 |
| H  | 7.470967000  | 18.482329000 | 13.045022000 |
| H  | 8.670548000  | 18.019647000 | 11.826466000 |
| H  | 7.574391000  | 16.802631000 | 12.504802000 |
| C  | 4.716056000  | 16.663152000 | 11.829767000 |
| H  | 5.376502000  | 15.806564000 | 11.744686000 |
| N  | 0.898697000  | 16.199456000 | 16.063319000 |
| N  | 0.376462000  | 18.219698000 | 17.566169000 |
| Sm | 1.316339000  | 13.928768000 | 14.605219000 |
| H  | -3.090922000 | 13.561543000 | 14.636409000 |
| O  | -1.980075000 | 12.253728000 | 15.691446000 |
| C  | -2.069119000 | 13.237290000 | 14.913817000 |
| O  | -1.116331000 | 13.889752000 | 14.410734000 |

### TS2

|   |              |              |             |
|---|--------------|--------------|-------------|
| C | 0.189093000  | -0.263140000 | 3.074375000 |
| H | -0.248934000 | -1.050912000 | 2.450828000 |
| H | -0.090651000 | 0.703915000  | 2.643199000 |
| C | -0.276113000 | -0.394997000 | 4.550626000 |
| H | -0.803115000 | 0.509865000  | 4.881150000 |
| H | -0.967112000 | -1.234407000 | 4.660433000 |
| C | 2.051295000  | -1.704961000 | 3.539871000 |

## SUPPORTING INFORMATION

---

|   |             |              |              |
|---|-------------|--------------|--------------|
| H | 3.136849000 | -1.802180000 | 3.455358000  |
| H | 1.610414000 | -2.475280000 | 2.899919000  |
| C | 1.568865000 | -1.831594000 | 5.012483000  |
| H | 0.878209000 | -2.673454000 | 5.128339000  |
| H | 2.412899000 | -2.000247000 | 5.691618000  |
| C | 2.270681000 | 0.678167000  | 3.833613000  |
| H | 1.969070000 | 1.643481000  | 3.412252000  |
| H | 3.358523000 | 0.601370000  | 3.748023000  |
| C | 1.791230000 | 0.522714000  | 5.306382000  |
| H | 2.639121000 | 0.360588000  | 5.983674000  |
| H | 1.270294000 | 1.423897000  | 5.649461000  |
| C | 4.616090000 | 1.408338000  | -0.272304000 |
| C | 4.177537000 | 0.760117000  | -1.471656000 |
| C | 4.424349000 | -0.643746000 | -1.323859000 |
| C | 5.009090000 | -0.854521000 | -0.039478000 |
| C | 5.139105000 | 0.413623000  | 0.611532000  |
| C | 4.719159000 | 2.877595000  | -0.079974000 |
| C | 5.494954000 | 3.633313000  | -0.973660000 |
| H | 5.978404000 | 3.114837000  | -1.794657000 |
| C | 5.647097000 | 5.013687000  | -0.826181000 |
| C | 6.516291000 | 5.844543000  | -1.755858000 |
| H | 5.999625000 | 6.806154000  | -1.891523000 |
| C | 6.715457000 | 5.230766000  | -3.141134000 |
| H | 7.231082000 | 5.940917000  | -3.795796000 |
| H | 7.330015000 | 4.324694000  | -3.096798000 |
| H | 5.764340000 | 4.964884000  | -3.606137000 |
| C | 7.873523000 | 6.145048000  | -1.103530000 |
| H | 8.476650000 | 6.798760000  | -1.741643000 |
| H | 7.752727000 | 6.634745000  | -0.134914000 |
| H | 8.435722000 | 5.219043000  | -0.941409000 |
| C | 4.991697000 | 5.643926000  | 0.238930000  |
| H | 5.092899000 | 6.723367000  | 0.350927000  |
| C | 4.211321000 | 4.926107000  | 1.150339000  |
| C | 3.486858000 | 5.628860000  | 2.286896000  |

## SUPPORTING INFORMATION

---

|   |              |             |              |
|---|--------------|-------------|--------------|
| H | 2.925250000  | 4.857962000 | 2.831805000  |
| C | 2.472719000  | 6.657290000 | 1.768916000  |
| H | 1.918583000  | 7.112260000 | 2.599056000  |
| H | 2.969450000  | 7.466822000 | 1.222320000  |
| H | 1.750592000  | 6.192896000 | 1.090956000  |
| C | 4.461265000  | 6.278037000 | 3.277161000  |
| H | 3.919666000  | 6.734361000 | 4.113966000  |
| H | 5.159986000  | 5.541014000 | 3.680882000  |
| H | 5.049503000  | 7.066420000 | 2.794270000  |
| C | 4.094144000  | 3.542509000 | 0.980684000  |
| H | 3.487995000  | 2.973785000 | 1.682040000  |
| C | 3.696439000  | 1.469603000 | -2.678861000 |
| C | 2.828407000  | 2.569666000 | -2.582370000 |
| H | 2.459045000  | 2.868454000 | -1.603511000 |
| C | 2.465030000  | 3.328468000 | -3.701675000 |
| C | 1.610254000  | 4.574411000 | -3.507562000 |
| H | 1.032568000  | 4.423158000 | -2.584676000 |
| C | 0.608767000  | 4.828228000 | -4.636003000 |
| H | -0.039790000 | 5.675834000 | -4.385948000 |
| H | 1.107812000  | 5.075598000 | -5.578581000 |
| H | -0.023777000 | 3.953361000 | -4.809502000 |
| C | 2.499880000  | 5.810874000 | -3.286570000 |
| H | 3.172850000  | 5.664277000 | -2.445018000 |
| H | 3.110968000  | 6.008128000 | -4.173908000 |
| H | 1.889319000  | 6.706311000 | -3.089350000 |
| C | 2.966976000  | 2.956977000 | -4.954312000 |
| H | 2.709081000  | 3.543369000 | -5.833707000 |
| C | 3.812182000  | 1.848588000 | -5.097422000 |
| C | 4.399561000  | 1.471498000 | -6.450383000 |
| H | 4.872481000  | 0.486638000 | -6.331534000 |
| C | 5.498838000  | 2.461865000 | -6.867180000 |
| H | 5.962262000  | 2.153430000 | -7.812289000 |
| H | 5.085806000  | 3.470619000 | -7.003797000 |
| H | 6.283252000  | 2.526562000 | -6.111242000 |

## SUPPORTING INFORMATION

---

|   |             |              |              |
|---|-------------|--------------|--------------|
| C | 3.338344000 | 1.340242000  | -7.548354000 |
| H | 3.795859000 | 0.995362000  | -8.484920000 |
| H | 2.556270000 | 0.622781000  | -7.267836000 |
| H | 2.852494000 | 2.301421000  | -7.755459000 |
| C | 4.166737000 | 1.121809000  | -3.958405000 |
| H | 4.848282000 | 0.282831000  | -4.057900000 |
| C | 4.319798000 | -1.688938000 | -2.373844000 |
| C | 5.477456000 | -2.391644000 | -2.743609000 |
| H | 6.412499000 | -2.153607000 | -2.245314000 |
| C | 5.462889000 | -3.374393000 | -3.734146000 |
| C | 6.745509000 | -4.087084000 | -4.125841000 |
| H | 7.542300000 | -3.681473000 | -3.488581000 |
| C | 6.670939000 | -5.595319000 | -3.861299000 |
| H | 6.450615000 | -5.800450000 | -2.808511000 |
| H | 5.888770000 | -6.067851000 | -4.466849000 |
| H | 7.620090000 | -6.078833000 | -4.111651000 |
| C | 7.129325000 | -3.799303000 | -5.583927000 |
| H | 7.214248000 | -2.726215000 | -5.763283000 |
| H | 8.092996000 | -4.264653000 | -5.831496000 |
| H | 6.378082000 | -4.194284000 | -6.279835000 |
| C | 4.250263000 | -3.665302000 | -4.364548000 |
| H | 4.221211000 | -4.432186000 | -5.135835000 |
| C | 3.074350000 | -2.986468000 | -4.030978000 |
| C | 1.768932000 | -3.318961000 | -4.732088000 |
| H | 1.000988000 | -2.660815000 | -4.309598000 |
| C | 1.845559000 | -3.036486000 | -6.240483000 |
| H | 0.878134000 | -3.213097000 | -6.724699000 |
| H | 2.143504000 | -2.003542000 | -6.439537000 |
| H | 2.575882000 | -3.688355000 | -6.725330000 |
| C | 1.328431000 | -4.764925000 | -4.464721000 |
| H | 1.232162000 | -4.960762000 | -3.395731000 |
| H | 0.363692000 | -4.968340000 | -4.935112000 |
| H | 2.051283000 | -5.482177000 | -4.870815000 |
| C | 3.127361000 | -1.999052000 | -3.041475000 |

## SUPPORTING INFORMATION

---

|   |              |              |              |
|---|--------------|--------------|--------------|
| H | 2.218737000  | -1.450160000 | -2.794551000 |
| C | 5.606967000  | -2.136004000 | 0.418840000  |
| C | 6.988235000  | -2.208903000 | 0.645508000  |
| H | 7.582249000  | -1.308707000 | 0.510628000  |
| C | 7.608077000  | -3.404474000 | 1.025646000  |
| C | 9.113689000  | -3.476813000 | 1.231101000  |
| H | 9.352948000  | -4.518138000 | 1.490700000  |
| C | 9.881025000  | -3.140021000 | -0.054138000 |
| H | 9.577014000  | -3.792712000 | -0.879385000 |
| H | 9.700460000  | -2.103269000 | -0.361995000 |
| H | 10.960724000 | -3.258393000 | 0.094480000  |
| C | 9.575341000  | -2.588173000 | 2.394860000  |
| H | 9.086974000  | -2.876094000 | 3.329919000  |
| H | 10.661454000 | -2.672126000 | 2.538889000  |
| H | 9.341178000  | -1.535798000 | 2.210080000  |
| C | 6.813538000  | -4.542095000 | 1.197721000  |
| H | 7.290479000  | -5.474813000 | 1.496887000  |
| C | 5.429701000  | -4.507295000 | 0.988996000  |
| C | 4.575504000  | -5.747049000 | 1.183422000  |
| H | 3.532723000  | -5.445299000 | 1.013123000  |
| C | 4.911906000  | -6.837069000 | 0.160281000  |
| H | 4.259652000  | -7.707949000 | 0.290269000  |
| H | 4.791631000  | -6.466998000 | -0.865768000 |
| H | 5.944273000  | -7.177483000 | 0.274906000  |
| C | 4.672556000  | -6.288780000 | 2.615439000  |
| H | 4.404173000  | -5.524300000 | 3.348442000  |
| H | 4.001915000  | -7.141930000 | 2.752435000  |
| H | 5.689515000  | -6.626968000 | 2.846749000  |
| C | 4.845711000  | -3.301286000 | 0.592388000  |
| H | 3.776078000  | -3.271407000 | 0.404113000  |
| C | 5.928314000  | 0.647842000  | 1.845799000  |
| C | 5.852788000  | -0.225433000 | 2.948934000  |
| H | 5.157703000  | -1.056955000 | 2.900072000  |
| C | 6.693538000  | -0.089841000 | 4.054884000  |



## SUPPORTING INFORMATION

---

|    |              |              |              |
|----|--------------|--------------|--------------|
| C  | 6.658833000  | -1.026086000 | 5.254694000  |
| H  | 7.708077000  | -1.191470000 | 5.538691000  |
| C  | 5.969716000  | -0.357662000 | 6.453671000  |
| H  | 6.433330000  | 0.602233000  | 6.698555000  |
| H  | 4.913020000  | -0.167168000 | 6.232812000  |
| H  | 6.016164000  | -0.998360000 | 7.341397000  |
| C  | 6.046580000  | -2.399924000 | 4.973954000  |
| H  | 6.491797000  | -2.874508000 | 4.095131000  |
| H  | 6.192800000  | -3.063100000 | 5.833827000  |
| H  | 4.968757000  | -2.334362000 | 4.804728000  |
| C  | 7.625725000  | 0.955286000  | 4.055124000  |
| H  | 8.303766000  | 1.059678000  | 4.902191000  |
| C  | 7.732218000  | 1.845513000  | 2.987065000  |
| C  | 8.785604000  | 2.942722000  | 3.006980000  |
| H  | 9.376971000  | 2.797755000  | 3.922962000  |
| C  | 9.754089000  | 2.839535000  | 1.818542000  |
| H  | 10.543011000 | 3.598948000  | 1.898959000  |
| H  | 10.235114000 | 1.857517000  | 1.778908000  |
| H  | 9.233644000  | 2.994120000  | 0.867009000  |
| C  | 8.152689000  | 4.336502000  | 3.083893000  |
| H  | 7.525391000  | 4.431433000  | 3.975331000  |
| H  | 8.925160000  | 5.112087000  | 3.127405000  |
| H  | 7.523412000  | 4.535698000  | 2.208829000  |
| C  | 6.875976000  | 1.681272000  | 1.892280000  |
| H  | 6.967917000  | 2.345345000  | 1.038742000  |
| N  | 1.664767000  | -0.384016000 | 2.994490000  |
| N  | 0.876035000  | -0.612138000 | 5.430805000  |
| Sm | 2.198623000  | -0.009415000 | 0.365680000  |
| H  | -0.015957000 | -0.777346000 | -0.426416000 |
| C  | -0.521277000 | 0.263940000  | -3.578782000 |
| H  | -0.027560000 | 1.093136000  | -3.059648000 |
| H  | -0.135921000 | -0.667522000 | -3.150448000 |
| C  | -0.292782000 | 0.337721000  | -5.114578000 |
| H  | 0.196268000  | -0.566835000 | -5.485683000 |

## SUPPORTING INFORMATION

---

|   |              |              |              |
|---|--------------|--------------|--------------|
| H | 0.352596000  | 1.183580000  | -5.370913000 |
| C | -2.497227000 | 1.616550000  | -3.807548000 |
| H | -3.570488000 | 1.657043000  | -3.586949000 |
| H | -2.008341000 | 2.429491000  | -3.258403000 |
| C | -2.232253000 | 1.704470000  | -5.338765000 |
| H | -1.592447000 | 2.557888000  | -5.586304000 |
| H | -3.170128000 | 1.828803000  | -5.889344000 |
| C | -2.654961000 | -0.779084000 | -3.985777000 |
| H | -2.244648000 | -1.717375000 | -3.595554000 |
| H | -3.722316000 | -0.738444000 | -3.732386000 |
| C | -2.421987000 | -0.661493000 | -5.519280000 |
| H | -3.372463000 | -0.536718000 | -6.051072000 |
| H | -1.938438000 | -1.561548000 | -5.917046000 |
| C | -4.649032000 | -1.320913000 | 0.145986000  |
| C | -4.067968000 | -0.912116000 | 1.393363000  |
| C | -4.242279000 | 0.505677000  | 1.506116000  |
| C | -4.909163000 | 0.962330000  | 0.333460000  |
| C | -5.185620000 | -0.165251000 | -0.506761000 |
| C | -4.843944000 | -2.737970000 | -0.257487000 |
| C | -5.569830000 | -3.589999000 | 0.589340000  |
| H | -5.963514000 | -3.178529000 | 1.513334000  |
| C | -5.779898000 | -4.934441000 | 0.273022000  |
| C | -6.602995000 | -5.861687000 | 1.154350000  |
| H | -6.151604000 | -6.861005000 | 1.064748000  |
| C | -6.593903000 | -5.484650000 | 2.635619000  |
| H | -7.080643000 | -6.266774000 | 3.224048000  |
| H | -7.145171000 | -4.553134000 | 2.819826000  |
| H | -5.576845000 | -5.353546000 | 3.013562000  |
| C | -8.043500000 | -5.963779000 | 0.633930000  |
| H | -8.619330000 | -6.684298000 | 1.222983000  |
| H | -8.071243000 | -6.279215000 | -0.412178000 |
| H | -8.546258000 | -4.993668000 | 0.702190000  |
| C | -5.234507000 | -5.430625000 | -0.917332000 |
| H | -5.377574000 | -6.483371000 | -1.159061000 |

## SUPPORTING INFORMATION

---

|   |              |              |              |
|---|--------------|--------------|--------------|
| C | -4.510152000 | -4.613944000 | -1.791568000 |
| C | -3.888813000 | -5.175446000 | -3.059826000 |
| H | -3.418839000 | -4.334446000 | -3.586955000 |
| C | -2.782413000 | -6.187949000 | -2.733577000 |
| H | -2.310294000 | -6.550558000 | -3.652319000 |
| H | -3.188933000 | -7.054287000 | -2.202189000 |
| H | -2.006512000 | -5.742744000 | -2.101839000 |
| C | -4.934256000 | -5.782270000 | -4.004399000 |
| H | -4.465330000 | -6.123412000 | -4.932405000 |
| H | -5.708356000 | -5.054428000 | -4.261637000 |
| H | -5.427640000 | -6.646717000 | -3.547873000 |
| C | -4.336165000 | -3.268151000 | -1.449960000 |
| H | -3.785720000 | -2.624177000 | -2.129981000 |
| C | -3.454535000 | -1.855280000 | 2.363692000  |
| C | -2.665278000 | -2.932317000 | 1.916305000  |
| H | -2.466991000 | -3.041463000 | 0.853144000  |
| C | -2.180890000 | -3.914965000 | 2.783652000  |
| C | -1.425212000 | -5.114561000 | 2.234574000  |
| H | -1.185612000 | -4.893938000 | 1.186557000  |
| C | -0.107980000 | -5.384637000 | 2.968619000  |
| H | 0.427929000  | -6.217024000 | 2.498949000  |
| H | -0.280616000 | -5.655050000 | 4.015416000  |
| H | 0.549034000  | -4.508396000 | 2.955081000  |
| C | -2.316435000 | -6.365116000 | 2.244881000  |
| H | -3.228721000 | -6.197056000 | 1.666094000  |
| H | -2.604316000 | -6.631152000 | 3.267620000  |
| H | -1.790012000 | -7.221546000 | 1.811168000  |
| C | -2.472646000 | -3.806525000 | 4.147102000  |
| H | -2.119787000 | -4.573692000 | 4.832025000  |
| C | -3.226211000 | -2.736826000 | 4.641573000  |
| C | -3.592560000 | -2.640538000 | 6.114748000  |
| H | -4.002208000 | -1.634294000 | 6.273775000  |
| C | -4.698387000 | -3.645682000 | 6.465904000  |
| H | -5.009531000 | -3.532269000 | 7.509272000  |

## SUPPORTING INFORMATION

---

|   |              |              |             |
|---|--------------|--------------|-------------|
| H | -4.345828000 | -4.675427000 | 6.327500000 |
| H | -5.579715000 | -3.506761000 | 5.832300000 |
| C | -2.388588000 | -2.803087000 | 7.054130000 |
| H | -2.699679000 | -2.662370000 | 8.094703000 |
| H | -1.598888000 | -2.079342000 | 6.839568000 |
| H | -1.952544000 | -3.806970000 | 6.980515000 |
| C | -3.703016000 | -1.776578000 | 3.743935000 |
| H | -4.306120000 | -0.961586000 | 4.127284000 |
| C | -4.088568000 | 1.372813000  | 2.710892000 |
| C | -5.083789000 | 1.304987000  | 3.701460000 |
| H | -5.896209000 | 0.591948000  | 3.575613000 |
| C | -5.076679000 | 2.139730000  | 4.817764000 |
| C | -6.172017000 | 2.042327000  | 5.866626000 |
| H | -6.845941000 | 1.233625000  | 5.551531000 |
| C | -7.001011000 | 3.330600000  | 5.940309000 |
| H | -7.422405000 | 3.587614000  | 4.962029000 |
| H | -6.390120000 | 4.176360000  | 6.273009000 |
| H | -7.827430000 | 3.217877000  | 6.651174000 |
| C | -5.614227000 | 1.668483000  | 7.248245000 |
| H | -5.055518000 | 0.728999000  | 7.211545000 |
| H | -6.425812000 | 1.555264000  | 7.976406000 |
| H | -4.935628000 | 2.441481000  | 7.626395000 |
| C | -4.051007000 | 3.086329000  | 4.926470000 |
| H | -4.031256000 | 3.762489000  | 5.779471000 |
| C | -3.061313000 | 3.209182000  | 3.952164000 |
| C | -2.016299000 | 4.307300000  | 4.072397000 |
| H | -2.227280000 | 4.843838000  | 5.007807000 |
| C | -2.131444000 | 5.319918000  | 2.926726000 |
| H | -1.413788000 | 6.137980000  | 3.057171000 |
| H | -3.138159000 | 5.745924000  | 2.880492000 |
| H | -1.930681000 | 4.847091000  | 1.959094000 |
| C | -0.588519000 | 3.757347000  | 4.176448000 |
| H | -0.493366000 | 3.069772000  | 5.020520000 |
| H | 0.129964000  | 4.571630000  | 4.322349000 |

## SUPPORTING INFORMATION

---

|   |               |              |              |
|---|---------------|--------------|--------------|
| H | -0.299676000  | 3.222785000  | 3.264504000  |
| C | -3.086744000  | 2.337205000  | 2.851988000  |
| H | -2.339687000  | 2.436312000  | 2.068996000  |
| C | -5.489551000  | 2.324622000  | 0.185416000  |
| C | -6.873649000  | 2.488203000  | 0.346112000  |
| H | -7.471093000  | 1.607519000  | 0.561311000  |
| C | -7.480545000  | 3.741099000  | 0.228315000  |
| C | -8.970517000  | 3.953920000  | 0.453212000  |
| H | -9.279782000  | 4.764221000  | -0.221150000 |
| C | -9.232042000  | 4.431885000  | 1.889121000  |
| H | -8.661810000  | 5.335935000  | 2.120938000  |
| H | -8.937565000  | 3.657973000  | 2.603695000  |
| H | -10.296896000 | 4.650594000  | 2.042687000  |
| C | -9.832249000  | 2.732267000  | 0.128801000  |
| H | -9.622224000  | 2.343163000  | -0.871623000 |
| H | -10.893706000 | 2.994216000  | 0.180297000  |
| H | -9.666252000  | 1.918803000  | 0.845054000  |
| C | -6.672455000  | 4.845988000  | -0.068149000 |
| H | -7.144828000  | 5.821931000  | -0.176945000 |
| C | -5.288983000  | 4.725714000  | -0.221603000 |
| C | -4.422700000  | 5.922349000  | -0.578509000 |
| H | -3.383725000  | 5.639134000  | -0.358667000 |
| C | -4.744585000  | 7.172101000  | 0.247702000  |
| H | -4.022247000  | 7.966861000  | 0.035260000  |
| H | -4.714263000  | 6.962279000  | 1.320911000  |
| H | -5.739573000  | 7.567193000  | 0.012081000  |
| C | -4.508090000  | 6.232960000  | -2.081068000 |
| H | -4.226215000  | 5.364492000  | -2.682849000 |
| H | -3.844106000  | 7.061991000  | -2.348541000 |
| H | -5.529790000  | 6.514618000  | -2.363093000 |
| C | -4.709952000  | 3.456231000  | -0.084607000 |
| H | -3.631836000  | 3.349651000  | -0.192731000 |
| C | -6.109759000  | -0.141921000 | -1.669946000 |
| C | -6.177533000  | 0.956247000  | -2.551107000 |
| H | -5.501979000  | 1.791547000  | -2.392291000 |
| C | -7.137317000  | 1.029329000  | -3.567651000 |
| C | -7.283744000  | 2.247891000  | -4.466897000 |

## SUPPORTING INFORMATION

---

|    |               |              |              |
|----|---------------|--------------|--------------|
| H  | -7.973206000  | 1.959214000  | -5.271042000 |
| C  | -5.974901000  | 2.680569000  | -5.131603000 |
| H  | -5.519442000  | 1.852713000  | -5.682118000 |
| H  | -5.252540000  | 3.044043000  | -4.390619000 |
| H  | -6.152575000  | 3.500963000  | -5.837099000 |
| C  | -7.926096000  | 3.421942000  | -3.712821000 |
| H  | -8.902118000  | 3.140709000  | -3.307018000 |
| H  | -8.070762000  | 4.280320000  | -4.378219000 |
| H  | -7.298441000  | 3.742907000  | -2.877193000 |
| C  | -8.035254000  | -0.030825000 | -3.712918000 |
| H  | -8.791530000  | 0.017083000  | -4.496105000 |
| C  | -8.004871000  | -1.137428000 | -2.861307000 |
| C  | -9.029526000  | -2.247451000 | -3.019169000 |
| H  | -9.701042000  | -1.945587000 | -3.831701000 |
| C  | -9.887649000  | -2.412905000 | -1.760299000 |
| H  | -10.663392000 | -3.168648000 | -1.916384000 |
| H  | -10.378820000 | -1.472933000 | -1.488445000 |
| H  | -9.278674000  | -2.731062000 | -0.907761000 |
| C  | -8.377572000  | -3.576263000 | -3.425822000 |
| H  | -7.817506000  | -3.466325000 | -4.359985000 |
| H  | -9.134876000  | -4.355345000 | -3.574117000 |
| H  | -7.682978000  | -3.927663000 | -2.660199000 |
| C  | -7.040852000  | -1.178630000 | -1.851535000 |
| H  | -7.027314000  | -2.017629000 | -1.164209000 |
| N  | -1.974083000  | 0.333661000  | -3.281304000 |
| N  | -1.570539000  | 0.489330000  | -5.816255000 |
| Sm | -2.272475000  | 0.102412000  | -0.572806000 |
| H  | 0.058780000   | 3.792262000  | 0.063085000  |
| O  | 0.900326000   | 2.033600000  | 0.557267000  |
| C  | -0.079474000  | 2.696945000  | 0.137902000  |
| O  | -1.210164000  | 2.250988000  | -0.199095000 |
| O  | 1.398985000   | -2.605718000 | 0.143589000  |
| C  | 0.404628000   | -2.642595000 | -0.513595000 |
| O  | -0.467191000  | -3.059715000 | -1.184646000 |

### Int3

|   |             |              |             |
|---|-------------|--------------|-------------|
| C | 0.683114000 | -0.307440000 | 3.297547000 |
| H | 0.253699000 | -1.112297000 | 2.692384000 |
| H | 0.340445000 | 0.639864000  | 2.870566000 |

## SUPPORTING INFORMATION

---

|   |              |              |              |
|---|--------------|--------------|--------------|
| C | 0.293826000  | -0.448374000 | 4.796028000  |
| H | -0.266083000 | 0.427053000  | 5.139693000  |
| H | -0.343018000 | -1.324166000 | 4.955112000  |
| C | 2.632224000  | -1.652496000 | 3.697457000  |
| H | 3.717317000  | -1.693216000 | 3.567846000  |
| H | 2.194301000  | -2.453222000 | 3.091339000  |
| C | 2.233456000  | -1.771878000 | 5.196704000  |
| H | 1.603260000  | -2.650118000 | 5.371369000  |
| H | 3.119569000  | -1.875471000 | 5.832752000  |
| C | 2.754227000  | 0.738143000  | 3.947090000  |
| H | 2.402767000  | 1.685294000  | 3.521738000  |
| H | 3.842060000  | 0.695268000  | 3.822312000  |
| C | 2.338305000  | 0.596563000  | 5.440030000  |
| H | 3.217798000  | 0.498684000  | 6.086016000  |
| H | 1.779177000  | 1.475069000  | 5.780083000  |
| C | 5.059234000  | 1.366580000  | -0.244475000 |
| C | 4.533681000  | 0.844568000  | -1.469408000 |
| C | 4.733520000  | -0.572333000 | -1.459001000 |
| C | 5.372816000  | -0.918599000 | -0.234261000 |
| C | 5.589115000  | 0.278745000  | 0.519580000  |
| C | 5.176230000  | 2.809720000  | 0.084503000  |
| C | 5.886190000  | 3.660993000  | -0.777467000 |
| H | 6.327188000  | 3.232202000  | -1.671375000 |
| C | 6.023676000  | 5.024981000  | -0.510596000 |
| C | 6.828456000  | 5.958011000  | -1.404616000 |
| H | 6.282185000  | 6.911972000  | -1.434054000 |
| C | 6.978558000  | 5.470094000  | -2.846858000 |
| H | 7.447701000  | 6.246656000  | -3.460008000 |
| H | 7.617415000  | 4.581882000  | -2.906700000 |
| H | 6.012047000  | 5.218726000  | -3.293373000 |
| C | 8.206957000  | 6.241313000  | -0.785753000 |
| H | 8.766954000  | 6.961576000  | -1.392867000 |
| H | 8.116538000  | 6.647122000  | 0.226529000  |
| H | 8.797756000  | 5.320573000  | -0.723620000 |
| C | 5.418956000  | 5.541570000  | 0.642694000  |
| H | 5.506017000  | 6.607980000  | 0.845796000  |
| C | 4.707302000  | 4.727136000  | 1.528105000  |
| C | 4.027936000  | 5.306692000  | 2.757873000  |
| H | 3.565989000  | 4.466036000  | 3.293737000  |

## SUPPORTING INFORMATION

---

|   |             |             |              |
|---|-------------|-------------|--------------|
| C | 2.905669000 | 6.281084000 | 2.373079000  |
| H | 2.385608000 | 6.648755000 | 3.264834000  |
| H | 3.304396000 | 7.150600000 | 1.839056000  |
| H | 2.169484000 | 5.800798000 | 1.721105000  |
| C | 5.024618000 | 5.970200000 | 3.716646000  |
| H | 4.515366000 | 6.326867000 | 4.618940000  |
| H | 5.807988000 | 5.269865000 | 4.019770000  |
| H | 5.511533000 | 6.833355000 | 3.249682000  |
| C | 4.606575000 | 3.363283000 | 1.237733000  |
| H | 4.063316000 | 2.718267000 | 1.925365000  |
| C | 3.987194000 | 1.659966000 | -2.578372000 |
| C | 3.118400000 | 2.736079000 | -2.336678000 |
| H | 2.801345000 | 2.942220000 | -1.317312000 |
| C | 2.670962000 | 3.572437000 | -3.364861000 |
| C | 1.809468000 | 4.779071000 | -3.022452000 |
| H | 1.311216000 | 4.552016000 | -2.069713000 |
| C | 0.717351000 | 5.076395000 | -4.053264000 |
| H | 0.065758000 | 5.882773000 | -3.699945000 |
| H | 1.139077000 | 5.399322000 | -5.011199000 |
| H | 0.095817000 | 4.195811000 | -4.242971000 |
| C | 2.686237000 | 6.019903000 | -2.792038000 |
| H | 3.431479000 | 5.835361000 | -2.013099000 |
| H | 3.217837000 | 6.291494000 | -3.711217000 |
| H | 2.076826000 | 6.879195000 | -2.488748000 |
| C | 3.090454000 | 3.306633000 | -4.671782000 |
| H | 2.760467000 | 3.951492000 | -5.482743000 |
| C | 3.940112000 | 2.229427000 | -4.957268000 |
| C | 4.414504000 | 1.962119000 | -6.376613000 |
| H | 5.025924000 | 1.050827000 | -6.341644000 |
| C | 5.306436000 | 3.098298000 | -6.896550000 |
| H | 5.689297000 | 2.866180000 | -7.896749000 |
| H | 4.748683000 | 4.039111000 | -6.964405000 |
| H | 6.161218000 | 3.265193000 | -6.233958000 |
| C | 3.248567000 | 1.698191000 | -7.338398000 |
| H | 3.620107000 | 1.444189000 | -8.337401000 |
| H | 2.624199000 | 0.870958000 | -6.987606000 |
| H | 2.606169000 | 2.579902000 | -7.440365000 |
| C | 4.377702000 | 1.421283000 | -3.907061000 |
| H | 5.055840000 | 0.599539000 | -4.118082000 |



## SUPPORTING INFORMATION

---

|   |              |              |              |
|---|--------------|--------------|--------------|
| C | 4.537559000  | -1.523600000 | -2.584039000 |
| C | 5.664886000  | -2.162609000 | -3.122875000 |
| H | 6.641456000  | -1.937978000 | -2.702327000 |
| C | 5.566044000  | -3.073685000 | -4.175483000 |
| C | 6.811521000  | -3.741508000 | -4.733734000 |
| H | 7.668174000  | -3.325669000 | -4.187098000 |
| C | 6.800723000  | -5.256446000 | -4.487864000 |
| H | 6.700253000  | -5.481029000 | -3.421885000 |
| H | 5.966917000  | -5.737274000 | -5.011837000 |
| H | 7.727982000  | -5.715543000 | -4.849082000 |
| C | 7.015774000  | -3.424715000 | -6.221220000 |
| H | 7.056594000  | -2.344885000 | -6.394962000 |
| H | 7.950414000  | -3.864535000 | -6.586677000 |
| H | 6.199986000  | -3.829484000 | -6.830445000 |
| C | 4.298013000  | -3.354472000 | -4.693429000 |
| H | 4.202242000  | -4.071242000 | -5.506451000 |
| C | 3.150325000  | -2.737420000 | -4.187678000 |
| C | 1.777487000  | -3.085121000 | -4.738806000 |
| H | 1.057475000  | -2.413376000 | -4.251236000 |
| C | 1.676920000  | -2.854018000 | -6.251981000 |
| H | 0.658358000  | -3.046016000 | -6.608057000 |
| H | 1.945829000  | -1.827430000 | -6.518573000 |
| H | 2.345927000  | -3.524006000 | -6.802670000 |
| C | 1.379149000  | -4.523622000 | -4.378556000 |
| H | 1.411278000  | -4.683900000 | -3.296671000 |
| H | 0.365814000  | -4.749183000 | -4.729761000 |
| H | 2.060567000  | -5.246054000 | -4.841070000 |
| C | 3.287268000  | -1.819191000 | -3.141390000 |
| H | 2.396602000  | -1.338994000 | -2.741944000 |
| C | 5.864274000  | -2.281215000 | 0.088621000  |
| C | 7.233754000  | -2.516184000 | 0.265873000  |
| H | 7.917253000  | -1.674522000 | 0.192899000  |
| C | 7.730295000  | -3.801538000 | 0.508627000  |
| C | 9.224229000  | -4.052563000 | 0.638369000  |
| H | 9.353831000  | -5.127977000 | 0.822374000  |
| C | 9.963473000  | -3.717560000 | -0.665014000 |
| H | 9.545951000  | -4.272548000 | -1.510860000 |
| H | 9.890452000  | -2.649446000 | -0.897186000 |
| H | 11.027184000 | -3.967948000 | -0.583627000 |

## SUPPORTING INFORMATION

---

|   |              |              |              |
|---|--------------|--------------|--------------|
| C | 9.841104000  | -3.302291000 | 1.825871000  |
| H | 9.368343000  | -3.594486000 | 2.768414000  |
| H | 10.912892000 | -3.517171000 | 1.903927000  |
| H | 9.723737000  | -2.218931000 | 1.718913000  |
| C | 6.822974000  | -4.861451000 | 0.594163000  |
| H | 7.204881000  | -5.863315000 | 0.784242000  |
| C | 5.446118000  | -4.665554000 | 0.430217000  |
| C | 4.469523000  | -5.826334000 | 0.517123000  |
| H | 3.463222000  | -5.407504000 | 0.382078000  |
| C | 4.697205000  | -6.846984000 | -0.606419000 |
| H | 3.951394000  | -7.648610000 | -0.560090000 |
| H | 4.628423000  | -6.372340000 | -1.589666000 |
| H | 5.687123000  | -7.309732000 | -0.525710000 |
| C | 4.506343000  | -6.506283000 | 1.892554000  |
| H | 4.309778000  | -5.789248000 | 2.695807000  |
| H | 3.754971000  | -7.301703000 | 1.952916000  |
| H | 5.484410000  | -6.960550000 | 2.085651000  |
| C | 4.985887000  | -3.372648000 | 0.172483000  |
| H | 3.920187000  | -3.213360000 | 0.014045000  |
| C | 6.419756000  | 0.373204000  | 1.743967000  |
| C | 6.355907000  | -0.600701000 | 2.760915000  |
| H | 5.653202000  | -1.420024000 | 2.650184000  |
| C | 7.217820000  | -0.576320000 | 3.858713000  |
| C | 7.186768000  | -1.615443000 | 4.971540000  |
| H | 8.236401000  | -1.820798000 | 5.226777000  |
| C | 6.522080000  | -1.044837000 | 6.234123000  |
| H | 7.007550000  | -0.119902000 | 6.559897000  |
| H | 5.467650000  | -0.814823000 | 6.042716000  |
| H | 6.565673000  | -1.763031000 | 7.060702000  |
| C | 6.548151000  | -2.949433000 | 4.581944000  |
| H | 6.965979000  | -3.348892000 | 3.653448000  |
| H | 6.704607000  | -3.688240000 | 5.375071000  |
| H | 5.465238000  | -2.855762000 | 4.443668000  |
| C | 8.162292000  | 0.454557000  | 3.939091000  |
| H | 8.854833000  | 0.474852000  | 4.780125000  |
| C | 8.258312000  | 1.440057000  | 2.957151000  |
| C | 9.321338000  | 2.521615000  | 3.058316000  |
| H | 9.929384000  | 2.288634000  | 3.943311000  |
| C | 10.259881000 | 2.521861000  | 1.844527000  |

## SUPPORTING INFORMATION

---

|    |              |              |              |
|----|--------------|--------------|--------------|
| H  | 11.060548000 | 3.258421000  | 1.975091000  |
| H  | 10.720328000 | 1.539581000  | 1.699412000  |
| H  | 9.722108000  | 2.777524000  | 0.925366000  |
| C  | 8.699828000  | 3.907355000  | 3.276298000  |
| H  | 8.086108000  | 3.922829000  | 4.182682000  |
| H  | 9.478479000  | 4.671536000  | 3.380583000  |
| H  | 8.059495000  | 4.190843000  | 2.434487000  |
| C  | 7.379249000  | 1.388542000  | 1.870067000  |
| H  | 7.459104000  | 2.129347000  | 1.081396000  |
| N  | 2.158685000  | -0.360830000 | 3.150915000  |
| N  | 1.494283000  | -0.584312000 | 5.624480000  |
| Sm | 2.691559000  | -0.060371000 | 0.477051000  |
| H  | 0.000205000  | -3.448988000 | -0.455933000 |
| C  | -0.658660000 | 0.371127000  | -3.270807000 |
| H  | -0.171011000 | 1.109800000  | -2.626871000 |
| H  | -0.348773000 | -0.619955000 | -2.925517000 |
| C  | -0.315119000 | 0.604633000  | -4.768852000 |
| H  | 0.203285000  | -0.260959000 | -5.193933000 |
| H  | 0.345908000  | 1.468666000  | -4.891421000 |
| C  | -2.557937000 | 1.822419000  | -3.508924000 |
| H  | -3.633359000 | 1.908290000  | -3.325188000 |
| H  | -2.052194000 | 2.559895000  | -2.876115000 |
| C  | -2.217454000 | 2.017657000  | -5.014914000 |
| H  | -1.565595000 | 2.884705000  | -5.164820000 |
| H  | -3.123871000 | 2.186294000  | -5.605213000 |
| C  | -2.794102000 | -0.542245000 | -3.905860000 |
| H  | -2.473941000 | -1.528437000 | -3.550183000 |
| H  | -3.874446000 | -0.461872000 | -3.741928000 |
| C  | -2.416589000 | -0.326343000 | -5.399836000 |
| H  | -3.309956000 | -0.161378000 | -6.012027000 |
| H  | -1.898594000 | -1.200928000 | -5.808571000 |
| C  | -4.946989000 | -1.398028000 | 0.293685000  |
| C  | -4.456231000 | -0.840039000 | 1.519198000  |
| C  | -4.704073000 | 0.569694000  | 1.481579000  |
| C  | -5.340349000 | 0.873101000  | 0.245753000  |
| C  | -5.511461000 | -0.342444000 | -0.491689000 |
| C  | -4.997321000 | -2.849610000 | -0.016598000 |
| C  | -5.678524000 | -3.718148000 | 0.851837000  |
| H  | -6.147664000 | -3.294322000 | 1.733793000  |

## SUPPORTING INFORMATION

---

|   |              |              |              |
|---|--------------|--------------|--------------|
| C | -5.752660000 | -5.091007000 | 0.606562000  |
| C | -6.527495000 | -6.044454000 | 1.505843000  |
| H | -5.943751000 | -6.975350000 | 1.552033000  |
| C | -6.710484000 | -5.545609000 | 2.940669000  |
| H | -7.156972000 | -6.331988000 | 3.558213000  |
| H | -7.382377000 | -4.681174000 | 2.983718000  |
| H | -5.758922000 | -5.253707000 | 3.394582000  |
| C | -7.887878000 | -6.390791000 | 0.879278000  |
| H | -8.422341000 | -7.128023000 | 1.489039000  |
| H | -7.772481000 | -6.801585000 | -0.128388000 |
| H | -8.515649000 | -5.495892000 | 0.804164000  |
| C | -5.111355000 | -5.598862000 | -0.530691000 |
| H | -5.149215000 | -6.671167000 | -0.717154000 |
| C | -4.424979000 | -4.768229000 | -1.420948000 |
| C | -3.705485000 | -5.338133000 | -2.632367000 |
| H | -3.253586000 | -4.489519000 | -3.164269000 |
| C | -2.567380000 | -6.281963000 | -2.219807000 |
| H | -2.017151000 | -6.636542000 | -3.098425000 |
| H | -2.954511000 | -7.161355000 | -1.693499000 |
| H | -1.859425000 | -5.781119000 | -1.552261000 |
| C | -4.666595000 | -6.032070000 | -3.606019000 |
| H | -4.130075000 | -6.388434000 | -4.492522000 |
| H | -5.456978000 | -5.351473000 | -3.934821000 |
| H | -5.146680000 | -6.899278000 | -3.139452000 |
| C | -4.389656000 | -3.396240000 | -1.153771000 |
| H | -3.865332000 | -2.740305000 | -1.845781000 |
| C | -3.843729000 | -1.619662000 | 2.620808000  |
| C | -2.958215000 | -2.679716000 | 2.357379000  |
| H | -2.677466000 | -2.895096000 | 1.329816000  |
| C | -2.454023000 | -3.496163000 | 3.373707000  |
| C | -1.581895000 | -4.690710000 | 3.018465000  |
| H | -1.254138000 | -4.547562000 | 1.980073000  |
| C | -0.324510000 | -4.807887000 | 3.885466000  |
| H | 0.306137000  | -5.634574000 | 3.540719000  |
| H | -0.571177000 | -5.003085000 | 4.934755000  |
| H | 0.269821000  | -3.889901000 | 3.846848000  |
| C | -2.395930000 | -5.992418000 | 3.063570000  |
| H | -3.255439000 | -5.937479000 | 2.389657000  |
| H | -2.770057000 | -6.182961000 | 4.075870000  |

## SUPPORTING INFORMATION

---

|   |              |              |             |
|---|--------------|--------------|-------------|
| H | -1.780521000 | -6.849180000 | 2.765654000 |
| C | -2.826672000 | -3.227279000 | 4.694943000 |
| H | -2.457166000 | -3.863533000 | 5.496239000 |
| C | -3.683351000 | -2.163389000 | 5.003263000 |
| C | -4.116144000 | -1.894549000 | 6.435833000 |
| H | -4.740637000 | -0.991668000 | 6.414631000 |
| C | -4.978413000 | -3.039705000 | 6.985737000 |
| H | -5.337044000 | -2.807134000 | 7.994791000 |
| H | -4.406411000 | -3.972608000 | 7.043479000 |
| H | -5.848495000 | -3.221848000 | 6.347489000 |
| C | -2.927650000 | -1.610312000 | 7.363099000 |
| H | -3.275023000 | -1.365466000 | 8.373041000 |
| H | -2.329554000 | -0.770543000 | 6.997291000 |
| H | -2.266808000 | -2.480367000 | 7.444999000 |
| C | -4.179323000 | -1.374589000 | 3.962991000 |
| H | -4.864841000 | -0.566733000 | 4.197783000 |
| C | -4.613572000 | 1.557071000  | 2.597243000 |
| C | -5.759696000 | 1.758798000  | 3.385085000 |
| H | -6.645611000 | 1.164138000  | 3.172895000 |
| C | -5.795673000 | 2.702777000  | 4.410100000 |
| C | -7.052674000 | 2.898939000  | 5.240031000 |
| H | -7.800572000 | 2.190077000  | 4.859990000 |
| C | -7.628989000 | 4.311663000  | 5.072716000 |
| H | -7.825488000 | 4.535903000  | 4.020094000 |
| H | -6.934808000 | 5.070260000  | 5.451166000 |
| H | -8.568068000 | 4.415602000  | 5.627613000 |
| C | -6.817049000 | 2.572764000  | 6.721017000 |
| H | -6.442149000 | 1.552440000  | 6.848370000 |
| H | -7.747384000 | 2.668010000  | 7.292028000 |
| H | -6.083832000 | 3.254632000  | 7.165980000 |
| C | -4.647837000 | 3.471957000  | 4.638448000 |
| H | -4.653247000 | 4.225479000  | 5.424478000 |
| C | -3.494813000 | 3.313238000  | 3.870569000 |
| C | -2.288860000 | 4.204123000  | 4.119962000 |
| H | -2.554931000 | 4.878927000  | 4.944792000 |
| C | -1.964600000 | 5.074406000  | 2.898461000 |
| H | -1.116880000 | 5.737280000  | 3.105513000 |
| H | -2.821717000 | 5.693951000  | 2.618689000 |
| H | -1.706007000 | 4.456450000  | 2.031995000 |

## SUPPORTING INFORMATION

---

|   |               |              |              |
|---|---------------|--------------|--------------|
| C | -1.060425000  | 3.401907000  | 4.565792000  |
| H | -1.280060000  | 2.810457000  | 5.460209000  |
| H | -0.221204000  | 4.068997000  | 4.793535000  |
| H | -0.735797000  | 2.714542000  | 3.776976000  |
| C | -3.488572000  | 2.344259000  | 2.855328000  |
| H | -2.603398000  | 2.226821000  | 2.234398000  |
| C | -5.933063000  | 2.196564000  | -0.071661000 |
| C | -7.327948000  | 2.333102000  | -0.137056000 |
| H | -7.937972000  | 1.449919000  | 0.022149000  |
| C | -7.929391000  | 3.564818000  | -0.400607000 |
| C | -9.439877000  | 3.754531000  | -0.416241000 |
| H | -9.662826000  | 4.438940000  | -1.247689000 |
| C | -9.907740000  | 4.440268000  | 0.878074000  |
| H | -9.389625000  | 5.390519000  | 1.039747000  |
| H | -9.707220000  | 3.800005000  | 1.744330000  |
| H | -10.984803000 | 4.640731000  | 0.847288000  |
| C | -10.233822000 | 2.468586000  | -0.652879000 |
| H | -9.888145000  | 1.935166000  | -1.543024000 |
| H | -11.296108000 | 2.700231000  | -0.783152000 |
| H | -10.154712000 | 1.784469000  | 0.199467000  |
| C | -7.102577000  | 4.674616000  | -0.617968000 |
| H | -7.565460000  | 5.635696000  | -0.838591000 |
| C | -5.710357000  | 4.580939000  | -0.550677000 |
| C | -4.828382000  | 5.796058000  | -0.785305000 |
| H | -3.791339000  | 5.474591000  | -0.619101000 |
| C | -5.125426000  | 6.924227000  | 0.211385000  |
| H | -4.424024000  | 7.755377000  | 0.077262000  |
| H | -5.045632000  | 6.570377000  | 1.243555000  |
| H | -6.137147000  | 7.321653000  | 0.073849000  |
| C | -4.931469000  | 6.300775000  | -2.231271000 |
| H | -4.677993000  | 5.511826000  | -2.946453000 |
| H | -4.253400000  | 7.144967000  | -2.399970000 |
| H | -5.948172000  | 6.639714000  | -2.458883000 |
| C | -5.141284000  | 3.333815000  | -0.271063000 |
| H | -4.057890000  | 3.250509000  | -0.198431000 |
| C | -6.364437000  | -0.487636000 | -1.696988000 |
| C | -6.407143000  | 0.490316000  | -2.710474000 |
| H | -5.763311000  | 1.360543000  | -2.622302000 |
| C | -7.295992000  | 0.397596000  | -3.786732000 |

## SUPPORTING INFORMATION

---

|    |               |              |              |
|----|---------------|--------------|--------------|
| C  | -7.41920000   | 1.48285000   | -4.845742000 |
| H  | -7.941692000  | 1.028476000  | -5.698849000 |
| C  | -6.076052000  | 2.001286000  | -5.363288000 |
| H  | -5.441800000  | 1.180608000  | -5.713384000 |
| H  | -5.533483000  | 2.549649000  | -4.585722000 |
| H  | -6.227376000  | 2.692244000  | -6.199701000 |
| C  | -8.286797000  | 2.645790000  | -4.341551000 |
| H  | -9.281423000  | 2.295443000  | -4.049407000 |
| H  | -8.410735000  | 3.407222000  | -5.120510000 |
| H  | -7.829579000  | 3.122101000  | -3.467679000 |
| C  | -8.151841000  | -0.706238000 | -3.851033000 |
| H  | -8.850872000  | -0.786922000 | -4.682728000 |
| C  | -8.147645000  | -1.695008000 | -2.865750000 |
| C  | -9.119354000  | -2.860767000 | -2.948180000 |
| H  | -9.764406000  | -2.676649000 | -3.818322000 |
| C  | -10.027145000 | -2.940462000 | -1.713762000 |
| H  | -10.763468000 | -3.744246000 | -1.825820000 |
| H  | -10.567952000 | -2.001640000 | -1.558592000 |
| H  | -9.448372000  | -3.145761000 | -0.806899000 |
| C  | -8.390846000  | -4.189852000 | -3.185368000 |
| H  | -7.795119000  | -4.150937000 | -4.103006000 |
| H  | -9.105774000  | -5.015182000 | -3.279651000 |
| H  | -7.713829000  | -4.422540000 | -2.356839000 |
| C  | -7.250754000  | -1.573166000 | -1.801799000 |
| H  | -7.254711000  | -2.320462000 | -1.015865000 |
| N  | -2.124082000  | 0.477945000  | -3.065786000 |
| N  | -1.536839000  | 0.834239000  | -5.542221000 |
| Sm | -2.605832000  | 0.064737000  | -0.402031000 |
| H  | 0.144743000   | 3.475166000  | 0.289648000  |
| O  | 1.016449000   | 1.665739000  | 0.442637000  |
| C  | -0.004625000  | 2.377304000  | 0.274326000  |
| O  | -1.183101000  | 1.975001000  | 0.094236000  |
| O  | 1.250259000   | -1.930755000 | -0.033074000 |
| C  | 0.103545000   | -2.353676000 | -0.324098000 |
| O  | -0.935786000  | -1.664572000 | -0.483184000 |

### Int4

|   |             |             |              |
|---|-------------|-------------|--------------|
| C | 2.473636000 | 1.457022000 | -3.378110000 |
| H | 3.480924000 | 1.433369000 | -2.953848000 |

## SUPPORTING INFORMATION

---

|   |              |              |              |
|---|--------------|--------------|--------------|
| H | 1.954943000  | 2.299076000  | -2.912102000 |
| C | 2.498441000  | 1.571142000  | -4.925629000 |
| H | 2.159921000  | 2.561262000  | -5.251716000 |
| H | 3.511367000  | 1.427368000  | -5.316724000 |
| C | 2.317107000  | -0.952644000 | -3.679866000 |
| H | 1.780434000  | -1.835147000 | -3.319785000 |
| H | 3.365375000  | -1.056506000 | -3.389158000 |
| C | 2.169565000  | -0.769098000 | -5.215601000 |
| H | 3.137383000  | -0.879365000 | -5.715999000 |
| H | 1.494375000  | -1.518998000 | -5.642431000 |
| C | 0.340959000  | 0.369255000  | -3.414960000 |
| H | -0.127230000 | 1.164899000  | -2.829028000 |
| H | -0.174667000 | -0.566863000 | -3.183342000 |
| C | 0.299189000  | 0.674729000  | -4.939489000 |
| H | -0.376601000 | -0.013538000 | -5.458636000 |
| H | -0.064729000 | 1.690197000  | -5.126990000 |
| C | 3.911323000  | -1.141626000 | 1.454825000  |
| C | 4.284740000  | 0.225695000  | 1.258781000  |
| C | 4.826729000  | 0.346024000  | -0.061367000 |
| C | 4.828572000  | -0.950595000 | -0.671962000 |
| C | 4.231951000  | -1.861870000 | 0.260890000  |
| C | 3.403427000  | -1.753645000 | 2.706157000  |
| C | 4.018660000  | -1.464342000 | 3.933975000  |
| H | 4.856793000  | -0.776728000 | 3.945420000  |
| C | 3.577937000  | -2.047669000 | 5.124584000  |
| C | 4.258997000  | -1.797310000 | 6.463275000  |
| H | 3.457069000  | -1.676693000 | 7.206514000  |
| C | 5.122034000  | -0.535298000 | 6.505825000  |
| H | 5.469375000  | -0.350657000 | 7.527756000  |
| H | 6.011897000  | -0.639682000 | 5.875026000  |
| H | 4.575449000  | 0.348923000  | 6.165501000  |
| C | 5.088384000  | -3.022658000 | 6.882188000  |
| H | 5.528818000  | -2.875571000 | 7.874912000  |
| H | 4.478910000  | -3.930910000 | 6.911441000  |
| H | 5.905136000  | -3.192408000 | 6.171668000  |
| C | 2.490884000  | -2.927260000 | 5.072630000  |
| H | 2.132978000  | -3.372044000 | 6.000161000  |
| C | 1.863773000  | -3.254754000 | 3.866684000  |
| C | 0.687562000  | -4.216913000 | 3.829848000  |



## SUPPORTING INFORMATION

---

|   |              |              |             |
|---|--------------|--------------|-------------|
| H | 0.415738000  | -4.352231000 | 2.775261000 |
| C | -0.538720000 | -3.642266000 | 4.552033000 |
| H | -1.385879000 | -4.333627000 | 4.487825000 |
| H | -0.328006000 | -3.468629000 | 5.613443000 |
| H | -0.848707000 | -2.690907000 | 4.109597000 |
| C | 1.050946000  | -5.597171000 | 4.391564000 |
| H | 0.204925000  | -6.286772000 | 4.297428000 |
| H | 1.902334000  | -6.027930000 | 3.857644000 |
| H | 1.314974000  | -5.540973000 | 5.453550000 |
| C | 2.336541000  | -2.664461000 | 2.691663000 |
| H | 1.866208000  | -2.919525000 | 1.744281000 |
| C | 4.405415000  | 1.285814000  | 2.301089000 |
| C | 3.321456000  | 1.798058000  | 3.023702000 |
| H | 2.324560000  | 1.428345000  | 2.810831000 |
| C | 3.496532000  | 2.771729000  | 4.012811000 |
| C | 2.297279000  | 3.313936000  | 4.774088000 |
| H | 1.402177000  | 2.869168000  | 4.319294000 |
| C | 2.170295000  | 4.837235000  | 4.641414000 |
| H | 1.261132000  | 5.194869000  | 5.137543000 |
| H | 3.019994000  | 5.352038000  | 5.103230000 |
| H | 2.129475000  | 5.140113000  | 3.590705000 |
| C | 2.322794000  | 2.893026000  | 6.249964000 |
| H | 2.356766000  | 1.803917000  | 6.349641000 |
| H | 3.200820000  | 3.302674000  | 6.761762000 |
| H | 1.431862000  | 3.255675000  | 6.775150000 |
| C | 4.788863000  | 3.227337000  | 4.287610000 |
| H | 4.935868000  | 3.980888000  | 5.058660000 |
| C | 5.898015000  | 2.734450000  | 3.592249000 |
| C | 7.301587000  | 3.235437000  | 3.891133000 |
| H | 7.987800000  | 2.658387000  | 3.257332000 |
| C | 7.706353000  | 2.990508000  | 5.350715000 |
| H | 8.744039000  | 3.298540000  | 5.520780000 |
| H | 7.076165000  | 3.561278000  | 6.041777000 |
| H | 7.616668000  | 1.932721000  | 5.615639000 |
| C | 7.463908000  | 4.714646000  | 3.515348000 |
| H | 8.492307000  | 5.049915000  | 3.691617000 |
| H | 7.225190000  | 4.880398000  | 2.460659000 |
| H | 6.800818000  | 5.349765000  | 4.113521000 |
| C | 5.688029000  | 1.770370000  | 2.604681000 |

## SUPPORTING INFORMATION

---

|   |              |              |              |
|---|--------------|--------------|--------------|
| H | 6.541263000  | 1.378544000  | 2.058012000  |
| C | 5.499010000  | 1.575112000  | -0.556316000 |
| C | 6.868432000  | 1.558601000  | -0.850476000 |
| H | 7.414246000  | 0.622367000  | -0.762089000 |
| C | 7.553064000  | 2.715168000  | -1.239346000 |
| C | 9.054629000  | 2.638520000  | -1.476031000 |
| H | 9.250435000  | 1.657271000  | -1.930474000 |
| C | 9.595440000  | 3.704673000  | -2.431760000 |
| H | 9.043684000  | 3.721814000  | -3.376972000 |
| H | 9.542903000  | 4.707074000  | -1.992079000 |
| H | 10.648551000 | 3.508930000  | -2.658333000 |
| C | 9.813028000  | 2.681647000  | -0.139520000 |
| H | 9.481752000  | 1.883778000  | 0.532083000  |
| H | 10.891316000 | 2.566403000  | -0.297700000 |
| H | 9.645229000  | 3.637918000  | 0.368595000  |
| C | 6.833464000  | 3.908045000  | -1.348111000 |
| H | 7.346129000  | 4.815812000  | -1.655091000 |
| C | 5.461919000  | 3.962031000  | -1.071962000 |
| C | 4.691362000  | 5.265862000  | -1.196989000 |
| H | 3.640311000  | 5.036668000  | -0.974950000 |
| C | 5.164716000  | 6.303356000  | -0.169561000 |
| H | 4.571004000  | 7.222010000  | -0.240041000 |
| H | 5.077902000  | 5.915987000  | 0.849912000  |
| H | 6.213163000  | 6.574427000  | -0.336121000 |
| C | 4.751327000  | 5.833972000  | -2.621369000 |
| H | 4.384337000  | 5.109086000  | -3.354773000 |
| H | 4.143145000  | 6.741824000  | -2.704720000 |
| H | 5.776508000  | 6.098907000  | -2.901815000 |
| C | 4.811618000  | 2.792549000  | -0.672336000 |
| H | 3.749074000  | 2.833883000  | -0.439080000 |
| C | 5.638244000  | -1.320645000 | -1.864973000 |
| C | 6.452979000  | -2.463560000 | -1.828071000 |
| H | 6.423838000  | -3.098604000 | -0.949718000 |
| C | 7.325528000  | -2.784998000 | -2.873605000 |
| C | 8.234584000  | -4.000564000 | -2.791081000 |
| H | 8.854211000  | -3.995638000 | -3.698485000 |
| C | 9.184836000  | -3.919668000 | -1.588734000 |
| H | 9.772042000  | -2.996060000 | -1.608476000 |
| H | 8.633055000  | -3.944787000 | -0.643259000 |

## SUPPORTING INFORMATION

---

|   |             |              |              |
|---|-------------|--------------|--------------|
| H | 9.880877000 | -4.765928000 | -1.589165000 |
| C | 7.440164000 | -5.312673000 | -2.782220000 |
| H | 6.818806000 | -5.400672000 | -3.678985000 |
| H | 8.116502000 | -6.174627000 | -2.753244000 |
| H | 6.778335000 | -5.372905000 | -1.912152000 |
| C | 7.371715000 | -1.950826000 | -3.991097000 |
| H | 8.051428000 | -2.199032000 | -4.804256000 |
| C | 6.581980000 | -0.799586000 | -4.071489000 |
| C | 6.674956000 | 0.126997000  | -5.272535000 |
| H | 5.895727000 | 0.891929000  | -5.150315000 |
| C | 8.025567000 | 0.855385000  | -5.311935000 |
| H | 8.066080000 | 1.558085000  | -6.151896000 |
| H | 8.195007000 | 1.415243000  | -4.387983000 |
| H | 8.851409000 | 0.145145000  | -5.430043000 |
| C | 6.410720000 | -0.599488000 | -6.597573000 |
| H | 5.447196000 | -1.118361000 | -6.587652000 |
| H | 6.407499000 | 0.109366000  | -7.432809000 |
| H | 7.184813000 | -1.346370000 | -6.804089000 |
| C | 5.734929000 | -0.498976000 | -3.003191000 |
| H | 5.166121000 | 0.423910000  | -3.041634000 |
| C | 4.186277000 | -3.341004000 | 0.120223000  |
| C | 3.525958000 | -3.967482000 | -0.942233000 |
| H | 2.970798000 | -3.357263000 | -1.645708000 |
| C | 3.543161000 | -5.357095000 | -1.093564000 |
| C | 2.770596000 | -6.032395000 | -2.213768000 |
| H | 3.016481000 | -7.102619000 | -2.174218000 |
| C | 1.257319000 | -5.892629000 | -1.994475000 |
| H | 0.958116000 | -6.332092000 | -1.038202000 |
| H | 0.955424000 | -4.840098000 | -1.978653000 |
| H | 0.699727000 | -6.398239000 | -2.791139000 |
| C | 3.176967000 | -5.520537000 | -3.601005000 |
| H | 4.251760000 | -5.635965000 | -3.768618000 |
| H | 2.646071000 | -6.071567000 | -4.385236000 |
| H | 2.934524000 | -4.459465000 | -3.721740000 |
| C | 4.262217000 | -6.117780000 | -0.167439000 |
| H | 4.291561000 | -7.200831000 | -0.281240000 |
| C | 4.943045000 | -5.528375000 | 0.903648000  |
| C | 5.731098000 | -6.386560000 | 1.880324000  |
| H | 5.664455000 | -7.422292000 | 1.519996000  |

## SUPPORTING INFORMATION

---

|    |              |              |              |
|----|--------------|--------------|--------------|
| C  | 7.217867000  | -6.007531000 | 1.909585000  |
| H  | 7.774421000  | -6.676540000 | 2.575485000  |
| H  | 7.664285000  | -6.072653000 | 0.912557000  |
| H  | 7.360962000  | -4.984556000 | 2.274707000  |
| C  | 5.128318000  | -6.348570000 | 3.290157000  |
| H  | 4.092389000  | -6.699424000 | 3.283395000  |
| H  | 5.698707000  | -6.987356000 | 3.973987000  |
| H  | 5.130807000  | -5.332143000 | 3.697095000  |
| C  | 4.883326000  | -4.139111000 | 1.041538000  |
| H  | 5.396903000  | -3.651973000 | 1.866041000  |
| N  | 1.750723000  | 0.224621000  | -2.970143000 |
| N  | 1.632514000  | 0.557098000  | -5.527850000 |
| Sm | 1.981665000  | -0.114408000 | -0.285707000 |
| H  | -0.097656000 | 3.689263000  | -0.342241000 |
| C  | 0.431122000  | 6.659083000  | 0.857574000  |
| H  | 0.034965000  | 6.176878000  | 1.758410000  |
| H  | 1.489664000  | 6.384786000  | 0.780189000  |
| C  | 0.239815000  | 8.204977000  | 0.904115000  |
| H  | 1.199364000  | 8.730433000  | 0.831587000  |
| H  | -0.233786000 | 8.522640000  | 1.840439000  |
| C  | -1.705203000 | 6.417777000  | -0.190051000 |
| H  | -2.218380000 | 5.986630000  | -1.056507000 |
| H  | -2.100804000 | 5.914169000  | 0.698211000  |
| C  | -1.902200000 | 7.961752000  | -0.116702000 |
| H  | -2.378021000 | 8.261069000  | 0.824416000  |
| H  | -2.538864000 | 8.324767000  | -0.932005000 |
| C  | 0.253446000  | 6.725765000  | -1.524707000 |
| H  | 1.316398000  | 6.470106000  | -1.606492000 |
| H  | -0.257627000 | 6.278071000  | -2.385218000 |
| C  | 0.037408000  | 8.268334000  | -1.470932000 |
| H  | -0.598278000 | 8.613385000  | -2.294771000 |
| H  | 0.987870000  | 8.809795000  | -1.545338000 |
| C  | -4.559403000 | 0.499709000  | -1.132090000 |
| C  | -4.544346000 | -0.930281000 | -1.113494000 |
| C  | -4.646347000 | -1.363175000 | 0.246288000  |
| C  | -4.736415000 | -0.202143000 | 1.070037000  |
| C  | -4.675361000 | 0.951322000  | 0.221414000  |
| C  | -4.679107000 | 1.333972000  | -2.358673000 |
| C  | -5.770978000 | 1.114027000  | -3.208718000 |

## SUPPORTING INFORMATION

---

|   |              |              |              |
|---|--------------|--------------|--------------|
| H | -6.474849000 | 0.326467000  | -2.955406000 |
| C | -5.975130000 | 1.886707000  | -4.356362000 |
| C | -7.180080000 | 1.655943000  | -5.252668000 |
| H | -7.128931000 | 2.402382000  | -6.057197000 |
| C | -7.144299000 | 0.267502000  | -5.904646000 |
| H | -8.008476000 | 0.125940000  | -6.563380000 |
| H | -7.160620000 | -0.525947000 | -5.150251000 |
| H | -6.236660000 | 0.134043000  | -6.500635000 |
| C | -8.499615000 | 1.879675000  | -4.501409000 |
| H | -9.353771000 | 1.770623000  | -5.178840000 |
| H | -8.540446000 | 2.880551000  | -4.060200000 |
| H | -8.624247000 | 1.152356000  | -3.691872000 |
| C | -5.044548000 | 2.882541000  | -4.658627000 |
| H | -5.192525000 | 3.482651000  | -5.554729000 |
| C | -3.933309000 | 3.123900000  | -3.842403000 |
| C | -2.926523000 | 4.203166000  | -4.207303000 |
| H | -2.113499000 | 4.145079000  | -3.470655000 |
| C | -2.316164000 | 3.973585000  | -5.596590000 |
| H | -1.523223000 | 4.702402000  | -5.798585000 |
| H | -3.069323000 | 4.082464000  | -6.384450000 |
| H | -1.891834000 | 2.969499000  | -5.686943000 |
| C | -3.537336000 | 5.607938000  | -4.117261000 |
| H | -2.788263000 | 6.375310000  | -4.344207000 |
| H | -3.939375000 | 5.802343000  | -3.119398000 |
| H | -4.358394000 | 5.725651000  | -4.833017000 |
| C | -3.769958000 | 2.351530000  | -2.688608000 |
| H | -2.926129000 | 2.548284000  | -2.030436000 |
| C | -4.649740000 | -1.811441000 | -2.302654000 |
| C | -3.719879000 | -1.791260000 | -3.348030000 |
| H | -2.859899000 | -1.129536000 | -3.283615000 |
| C | -3.863285000 | -2.610151000 | -4.471286000 |
| C | -2.819415000 | -2.592300000 | -5.575476000 |
| H | -2.042839000 | -1.879248000 | -5.266238000 |
| C | -2.144380000 | -3.960155000 | -5.744419000 |
| H | -1.351059000 | -3.911310000 | -6.498938000 |
| H | -2.863674000 | -4.719092000 | -6.071132000 |
| H | -1.703811000 | -4.302918000 | -4.803474000 |
| C | -3.397966000 | -2.093068000 | -6.906060000 |
| H | -3.835250000 | -1.096082000 | -6.796801000 |

## SUPPORTING INFORMATION

---

|   |              |              |              |
|---|--------------|--------------|--------------|
| H | -4.183124000 | -2.763367000 | -7.272557000 |
| H | -2.619030000 | -2.043365000 | -7.675316000 |
| C | -4.979635000 | -3.448772000 | -4.549111000 |
| H | -5.103020000 | -4.088586000 | -5.420385000 |
| C | -5.939811000 | -3.484991000 | -3.532533000 |
| C | -7.152481000 | -4.398098000 | -3.618500000 |
| H | -7.804245000 | -4.140051000 | -2.773213000 |
| C | -7.959531000 | -4.182227000 | -4.904840000 |
| H | -8.862927000 | -4.802177000 | -4.901656000 |
| H | -7.379440000 | -4.453552000 | -5.793767000 |
| H | -8.264941000 | -3.136992000 | -5.013423000 |
| C | -6.755949000 | -5.872330000 | -3.457761000 |
| H | -7.640264000 | -6.519141000 | -3.483509000 |
| H | -6.240450000 | -6.037126000 | -2.507154000 |
| H | -6.085647000 | -6.190159000 | -4.264330000 |
| C | -5.754899000 | -2.667707000 | -2.415556000 |
| H | -6.485949000 | -2.691545000 | -1.611563000 |
| C | -4.817894000 | -2.771482000 | 0.682463000  |
| C | -5.932138000 | -3.124645000 | 1.461015000  |
| H | -6.626550000 | -2.349413000 | 1.773437000  |
| C | -6.178698000 | -4.449152000 | 1.821645000  |
| C | -7.414761000 | -4.809645000 | 2.628762000  |
| H | -7.915600000 | -3.866234000 | 2.883613000  |
| C | -7.063570000 | -5.514607000 | 3.945132000  |
| H | -6.386511000 | -4.905135000 | 4.550939000  |
| H | -6.574597000 | -6.478167000 | 3.764586000  |
| H | -7.967205000 | -5.708285000 | 4.533874000  |
| C | -8.400098000 | -5.648566000 | 1.802647000  |
| H | -8.688313000 | -5.128664000 | 0.883664000  |
| H | -9.310105000 | -5.858814000 | 2.376010000  |
| H | -7.957315000 | -6.609073000 | 1.516100000  |
| C | -5.276959000 | -5.432526000 | 1.397052000  |
| H | -5.451315000 | -6.473593000 | 1.664642000  |
| C | -4.151785000 | -5.116742000 | 0.632654000  |
| C | -3.173755000 | -6.207511000 | 0.228911000  |
| H | -3.647235000 | -7.167535000 | 0.477791000  |
| C | -1.875884000 | -6.108915000 | 1.043082000  |
| H | -1.201161000 | -6.938382000 | 0.803012000  |
| H | -2.081086000 | -6.136028000 | 2.117971000  |

## SUPPORTING INFORMATION

---

|   |               |              |              |
|---|---------------|--------------|--------------|
| H | -1.350203000  | -5.173605000 | 0.822780000  |
| C | -2.874898000  | -6.213935000 | -1.274652000 |
| H | -3.792062000  | -6.304318000 | -1.863713000 |
| H | -2.220619000  | -7.054769000 | -1.530141000 |
| H | -2.368400000  | -5.294833000 | -1.585942000 |
| C | -3.934497000  | -3.779696000 | 0.278364000  |
| H | -3.070167000  | -3.513677000 | -0.323273000 |
| C | -5.108289000  | -0.182937000 | 2.510404000  |
| C | -6.329159000  | 0.403546000  | 2.870815000  |
| H | -6.940411000  | 0.849215000  | 2.090685000  |
| C | -6.774353000  | 0.411726000  | 4.196359000  |
| C | -8.125454000  | 1.000077000  | 4.569084000  |
| H | -8.204883000  | 0.949839000  | 5.663765000  |
| C | -9.275355000  | 0.165849000  | 3.986141000  |
| H | -9.208230000  | -0.878836000 | 4.305683000  |
| H | -9.256939000  | 0.181752000  | 2.890792000  |
| H | -10.245409000 | 0.560287000  | 4.309169000  |
| C | -8.255557000  | 2.473087000  | 4.163209000  |
| H | -7.465459000  | 3.080103000  | 4.614153000  |
| H | -9.222921000  | 2.876659000  | 4.482763000  |
| H | -8.185894000  | 2.594655000  | 3.077267000  |
| C | -5.959818000  | -0.167292000 | 5.172101000  |
| H | -6.297709000  | -0.159649000 | 6.207155000  |
| C | -4.732712000  | -0.759316000 | 4.850698000  |
| C | -3.854564000  | -1.370308000 | 5.929695000  |
| H | -2.979975000  | -1.800883000 | 5.425818000  |
| C | -4.563171000  | -2.508765000 | 6.675095000  |
| H | -3.890069000  | -2.970706000 | 7.405805000  |
| H | -4.898342000  | -3.285831000 | 5.981831000  |
| H | -5.441513000  | -2.144012000 | 7.219054000  |
| C | -3.344961000  | -0.306370000 | 6.912274000  |
| H | -2.800812000  | 0.486808000  | 6.390149000  |
| H | -2.671457000  | -0.751913000 | 7.653050000  |
| H | -4.174104000  | 0.160868000  | 7.455322000  |
| C | -4.325141000  | -0.768331000 | 3.514431000  |
| H | -3.373728000  | -1.222169000 | 3.253995000  |
| C | -4.812494000  | 2.343872000  | 0.706403000  |
| C | -4.099808000  | 2.772087000  | 1.839388000  |
| H | -3.421625000  | 2.076319000  | 2.325401000  |

## SUPPORTING INFORMATION

---

|    |              |              |              |
|----|--------------|--------------|--------------|
| C  | -4.264741000 | 4.052667000  | 2.366246000  |
| C  | -3.538484000 | 4.518434000  | 3.619130000  |
| H  | -3.383397000 | 5.601547000  | 3.509646000  |
| C  | -2.163884000 | 3.874855000  | 3.816828000  |
| H  | -1.536830000 | 3.978603000  | 2.925504000  |
| H  | -2.247742000 | 2.807325000  | 4.047161000  |
| H  | -1.643928000 | 4.346063000  | 4.657390000  |
| C  | -4.416454000 | 4.305602000  | 4.862821000  |
| H  | -5.373319000 | 4.827816000  | 4.765746000  |
| H  | -3.915426000 | 4.679095000  | 5.763276000  |
| H  | -4.628705000 | 3.240762000  | 5.006564000  |
| C  | -5.179087000 | 4.910717000  | 1.742558000  |
| H  | -5.331129000 | 5.908862000  | 2.152708000  |
| C  | -5.915168000 | 4.519211000  | 0.622023000  |
| C  | -6.933954000 | 5.464453000  | 0.006067000  |
| H  | -6.951575000 | 6.366598000  | 0.632949000  |
| C  | -8.348250000 | 4.869062000  | 0.021930000  |
| H  | -9.076542000 | 5.593046000  | -0.360042000 |
| H  | -8.647985000 | 4.587282000  | 1.035983000  |
| H  | -8.410604000 | 3.974097000  | -0.606362000 |
| C  | -6.534506000 | 5.894960000  | -1.410470000 |
| H  | -5.560341000 | 6.393689000  | -1.407059000 |
| H  | -7.269730000 | 6.592209000  | -1.827812000 |
| H  | -6.466562000 | 5.033950000  | -2.083622000 |
| C  | -5.709376000 | 3.235570000  | 0.103454000  |
| H  | -6.271012000 | 2.904992000  | -0.765252000 |
| N  | -0.273832000 | 6.099255000  | -0.304645000 |
| N  | -0.606913000 | 8.644255000  | -0.209210000 |
| Sm | -2.136577000 | -0.091857000 | 0.075753000  |
| H  | 0.181552000  | -0.258665000 | 3.622656000  |
| O  | 0.873820000  | 0.140982000  | 1.773538000  |
| C  | -0.065352000 | -0.136668000 | 2.555637000  |
| O  | -1.278298000 | -0.281889000 | 2.230497000  |
| O  | 1.093275000  | 2.062384000  | -0.540045000 |
| C  | -0.043769000 | 2.586703000  | -0.407653000 |
| O  | -1.136090000 | 1.948423000  | -0.364394000 |
| C  | -0.160289000 | -1.470231000 | -0.711023000 |
| O  | 0.944491000  | -2.077904000 | -0.901821000 |
| O  | -1.306510000 | -2.000685000 | -0.889436000 |



## SUPPORTING INFORMATION

---

### Int5

|    |              |              |              |
|----|--------------|--------------|--------------|
| Sm | -1.923988000 | 0.130553000  | 0.498219000  |
| Sm | 2.029710000  | 0.172343000  | -0.320402000 |
| C  | 0.305714000  | -1.528712000 | 0.450904000  |
| C  | 0.103180000  | 2.846573000  | 0.743741000  |
| O  | 0.356818000  | -0.459482000 | 1.243298000  |
| C  | 0.131065000  | 1.210508000  | -2.303686000 |
| C  | -0.606120000 | 1.005546000  | 3.721588000  |
| H  | -0.592775000 | 2.020012000  | 3.317510000  |
| H  | 0.229836000  | 0.461127000  | 3.282513000  |
| C  | -0.555967000 | 1.008502000  | 5.274507000  |
| H  | 0.360489000  | 0.529577000  | 5.635039000  |
| H  | -0.563437000 | 2.030530000  | 5.669529000  |
| C  | -1.872638000 | -1.040074000 | 3.748916000  |
| H  | -1.058008000 | -1.571323000 | 3.248836000  |
| H  | -2.814811000 | -1.500031000 | 3.439251000  |
| C  | -1.724026000 | -1.061965000 | 5.295899000  |
| H  | -2.551260000 | -1.609948000 | 5.760488000  |
| H  | -0.794833000 | -1.558552000 | 5.594754000  |
| C  | -2.992346000 | 1.104166000  | 3.870470000  |
| H  | -3.933053000 | 0.711983000  | 3.480108000  |
| H  | -2.900741000 | 2.145811000  | 3.550008000  |
| C  | -2.928089000 | 0.985344000  | 5.417521000  |
| H  | -2.950686000 | 1.973637000  | 5.890597000  |
| H  | -3.787191000 | 0.422663000  | 5.798132000  |
| C  | -3.874748000 | -0.642652000 | -1.479708000 |
| C  | -4.413879000 | -1.121974000 | -0.246425000 |
| C  | -4.798934000 | 0.011428000  | 0.552213000  |
| C  | -4.471451000 | 1.196393000  | -0.194636000 |
| C  | -3.906748000 | 0.791434000  | -1.445669000 |
| C  | -3.663078000 | -1.466468000 | -2.703004000 |
| C  | -4.703038000 | -2.309220000 | -3.119786000 |
| H  | -5.583297000 | -2.401775000 | -2.492117000 |
| C  | -4.644386000 | -3.002204000 | -4.333469000 |
| C  | -5.776037000 | -3.908794000 | -4.786989000 |
| H  | -5.544722000 | -4.214440000 | -5.816625000 |
| C  | -7.129439000 | -3.187784000 | -4.818335000 |
| H  | -7.088040000 | -2.291836000 | -5.445841000 |

## SUPPORTING INFORMATION

---

|   |              |              |              |
|---|--------------|--------------|--------------|
| H | -7.907686000 | -3.847409000 | -5.217767000 |
| H | -7.442759000 | -2.880621000 | -3.815162000 |
| C | -5.845433000 | -5.181526000 | -3.931846000 |
| H | -4.901471000 | -5.733663000 | -3.973673000 |
| H | -6.042034000 | -4.940757000 | -2.882013000 |
| H | -6.643843000 | -5.844271000 | -4.285074000 |
| C | -3.515488000 | -2.834762000 | -5.133239000 |
| H | -3.465938000 | -3.350916000 | -6.091617000 |
| C | -2.449255000 | -2.011733000 | -4.750662000 |
| C | -1.265992000 | -1.892689000 | -5.700731000 |
| H | -1.694499000 | -1.793664000 | -6.708675000 |
| C | -0.387775000 | -0.665142000 | -5.465790000 |
| H | -0.980242000 | 0.254984000  | -5.446633000 |
| H | 0.164304000  | -0.734642000 | -4.522745000 |
| H | 0.355642000  | -0.572456000 | -6.263428000 |
| C | -0.426895000 | -3.180278000 | -5.695958000 |
| H | -1.033235000 | -4.053238000 | -5.955734000 |
| H | 0.397295000  | -3.112711000 | -6.414565000 |
| H | -0.001515000 | -3.366320000 | -4.704737000 |
| C | -2.533338000 | -1.339421000 | -3.528650000 |
| H | -1.730533000 | -0.684566000 | -3.210419000 |
| C | -4.764813000 | -2.545247000 | 0.014417000  |
| C | -6.109985000 | -2.894062000 | 0.207845000  |
| H | -6.861048000 | -2.107570000 | 0.211827000  |
| C | -6.506775000 | -4.221664000 | 0.393125000  |
| C | -7.988663000 | -4.534324000 | 0.560964000  |
| H | -8.397334000 | -3.761058000 | 1.226936000  |
| C | -8.729798000 | -4.415704000 | -0.780387000 |
| H | -8.586628000 | -3.429458000 | -1.232016000 |
| H | -8.365181000 | -5.165656000 | -1.490832000 |
| H | -9.806143000 | -4.572465000 | -0.646213000 |
| C | -8.276863000 | -5.892620000 | 1.203682000  |
| H | -7.748483000 | -6.016486000 | 2.154168000  |
| H | -9.349235000 | -5.996594000 | 1.398361000  |
| H | -7.986785000 | -6.719375000 | 0.545490000  |
| C | -5.516102000 | -5.210316000 | 0.393257000  |
| H | -5.790897000 | -6.250723000 | 0.547316000  |
| C | -4.165791000 | -4.899176000 | 0.203737000  |
| C | -3.118249000 | -5.999752000 | 0.216710000  |

## SUPPORTING INFORMATION

---

|   |               |              |              |
|---|---------------|--------------|--------------|
| H | -3.646525000  | -6.941208000 | 0.421860000  |
| C | -2.426132000  | -6.143263000 | -1.145271000 |
| H | -1.718040000  | -6.979449000 | -1.131127000 |
| H | -3.154175000  | -6.325702000 | -1.941423000 |
| H | -1.867360000  | -5.238120000 | -1.402349000 |
| C | -2.088380000  | -5.791665000 | 1.335588000  |
| H | -2.575762000  | -5.718959000 | 2.313428000  |
| H | -1.382724000  | -6.629179000 | 1.369159000  |
| H | -1.512217000  | -4.874808000 | 1.174063000  |
| C | -3.801953000  | -3.561912000 | 0.008130000  |
| H | -2.758395000  | -3.302484000 | -0.147190000 |
| C | -5.642769000  | -0.075647000 | 1.771961000  |
| C | -5.471322000  | -1.105206000 | 2.716770000  |
| H | -4.687161000  | -1.840187000 | 2.559433000  |
| C | -6.303214000  | -1.241493000 | 3.829258000  |
| C | -6.100109000  | -2.397081000 | 4.796922000  |
| H | -5.084043000  | -2.780643000 | 4.629490000  |
| C | -7.074172000  | -3.542463000 | 4.484387000  |
| H | -6.901355000  | -4.394941000 | 5.151005000  |
| H | -8.112281000  | -3.216721000 | 4.615368000  |
| H | -6.954155000  | -3.883773000 | 3.452521000  |
| C | -6.201435000  | -1.984541000 | 6.269638000  |
| H | -5.519114000  | -1.162949000 | 6.509389000  |
| H | -7.214900000  | -1.661620000 | 6.531048000  |
| H | -5.954393000  | -2.830418000 | 6.919954000  |
| C | -7.350855000  | -0.327074000 | 3.989758000  |
| H | -8.022729000  | -0.418646000 | 4.840506000  |
| C | -7.568235000  | 0.699132000  | 3.069056000  |
| C | -8.740752000  | 1.649796000  | 3.245972000  |
| H | -9.279380000  | 1.327838000  | 4.147752000  |
| C | -9.723214000  | 1.564100000  | 2.070035000  |
| H | -10.592828000 | 2.207048000  | 2.245512000  |
| H | -9.252550000  | 1.888483000  | 1.135763000  |
| H | -10.080253000 | 0.539656000  | 1.925138000  |
| C | -8.278937000  | 3.094451000  | 3.475636000  |
| H | -9.138454000  | 3.752002000  | 3.648088000  |
| H | -7.618690000  | 3.162365000  | 4.345978000  |
| H | -7.731033000  | 3.478879000  | 2.608926000  |
| C | -6.705330000  | 0.817672000  | 1.973250000  |

## SUPPORTING INFORMATION

---

|   |              |             |              |
|---|--------------|-------------|--------------|
| H | -6.875847000 | 1.603776000 | 1.246366000  |
| C | -4.912376000 | 2.595873000 | 0.076462000  |
| C | -5.918759000 | 3.133263000 | -0.744771000 |
| H | -6.331475000 | 2.515203000 | -1.538232000 |
| C | -6.390459000 | 4.434046000 | -0.575201000 |
| C | -7.460734000 | 4.991639000 | -1.498075000 |
| H | -7.791395000 | 4.163548000 | -2.138978000 |
| C | -8.687709000 | 5.500461000 | -0.730776000 |
| H | -9.112270000 | 4.718234000 | -0.094087000 |
| H | -8.434825000 | 6.351916000 | -0.089450000 |
| H | -9.466259000 | 5.833019000 | -1.425997000 |
| C | -6.891056000 | 6.083337000 | -2.415381000 |
| H | -7.656118000 | 6.441877000 | -3.113116000 |
| H | -6.540766000 | 6.943930000 | -1.834294000 |
| H | -6.045924000 | 5.705013000 | -2.997908000 |
| C | -5.830686000 | 5.212814000 | 0.446369000  |
| H | -6.176063000 | 6.234580000 | 0.593355000  |
| C | -4.828132000 | 4.717922000 | 1.282316000  |
| C | -4.244546000 | 5.600151000 | 2.374706000  |
| H | -4.685269000 | 6.597922000 | 2.244680000  |
| C | -4.637360000 | 5.108114000 | 3.774160000  |
| H | -5.724081000 | 5.056638000 | 3.885818000  |
| H | -4.238011000 | 4.106577000 | 3.966503000  |
| H | -4.245145000 | 5.779197000 | 4.546505000  |
| C | -2.723354000 | 5.753406000 | 2.251187000  |
| H | -2.444861000 | 6.156922000 | 1.273122000  |
| H | -2.340734000 | 6.431699000 | 3.021837000  |
| H | -2.213612000 | 4.791403000 | 2.370411000  |
| C | -4.380861000 | 3.403203000 | 1.084998000  |
| H | -3.583443000 | 3.011962000 | 1.707827000  |
| C | -3.683774000 | 1.715079000 | -2.588580000 |
| C | -4.300267000 | 1.448764000 | -3.818755000 |
| H | -4.871206000 | 0.532409000 | -3.930920000 |
| C | -4.226602000 | 2.352406000 | -4.884067000 |
| C | -4.929186000 | 2.074656000 | -6.202834000 |
| H | -4.795220000 | 2.967205000 | -6.829200000 |
| C | -6.438372000 | 1.866582000 | -6.018176000 |
| H | -6.897965000 | 2.721780000 | -5.512779000 |
| H | -6.931612000 | 1.738148000 | -6.988005000 |

## SUPPORTING INFORMATION

---

|   |              |              |              |
|---|--------------|--------------|--------------|
| H | -6.647335000 | 0.972776000  | -5.420591000 |
| C | -4.296438000 | 0.889451000  | -6.944519000 |
| H | -3.233789000 | 1.067561000  | -7.137185000 |
| H | -4.378769000 | -0.033451000 | -6.360905000 |
| H | -4.792970000 | 0.725457000  | -7.907705000 |
| C | -3.508700000 | 3.534774000  | -4.701464000 |
| H | -3.452257000 | 4.251775000  | -5.520081000 |
| C | -2.872142000 | 3.836674000  | -3.491274000 |
| C | -2.095233000 | 5.140697000  | -3.381946000 |
| H | -2.644847000 | 5.877357000  | -3.985142000 |
| C | -2.002357000 | 5.695663000  | -1.959871000 |
| H | -1.550647000 | 6.693152000  | -1.972693000 |
| H | -2.988591000 | 5.768609000  | -1.492036000 |
| H | -1.374237000 | 5.065228000  | -1.321271000 |
| C | -0.698455000 | 4.998368000  | -4.007160000 |
| H | -0.173151000 | 5.959725000  | -4.011392000 |
| H | -0.086591000 | 4.287113000  | -3.441450000 |
| H | -0.757833000 | 4.639361000  | -5.039353000 |
| C | -2.968940000 | 2.917021000  | -2.443688000 |
| H | -2.514567000 | 3.141853000  | -1.483482000 |
| C | 4.605641000  | 1.138694000  | 0.197231000  |
| C | 4.256044000  | 0.433202000  | 1.397492000  |
| C | 4.219069000  | -0.963587000 | 1.085088000  |
| C | 4.545715000  | -1.124086000 | -0.303016000 |
| C | 4.780084000  | 0.182032000  | -0.850997000 |
| C | 4.957680000  | 2.577767000  | 0.091013000  |
| C | 4.392093000  | 3.414498000  | -0.879722000 |
| H | 3.633814000  | 3.013840000  | -1.547411000 |
| C | 4.786674000  | 4.750122000  | -1.003031000 |
| C | 4.143605000  | 5.677948000  | -2.020459000 |
| H | 4.766242000  | 6.582394000  | -2.062870000 |
| C | 4.098577000  | 5.082557000  | -3.432084000 |
| H | 3.711913000  | 5.818798000  | -4.145438000 |
| H | 5.093843000  | 4.773385000  | -3.764507000 |
| H | 3.445748000  | 4.204981000  | -3.479522000 |
| C | 2.742850000  | 6.106567000  | -1.558890000 |
| H | 2.778283000  | 6.576693000  | -0.570818000 |
| H | 2.301209000  | 6.821927000  | -2.261992000 |
| H | 2.075461000  | 5.240484000  | -1.494417000 |

## SUPPORTING INFORMATION

---

|   |             |              |              |
|---|-------------|--------------|--------------|
| C | 5.769347000 | 5.242271000  | -0.137372000 |
| H | 6.074552000 | 6.281169000  | -0.237998000 |
| C | 6.356938000 | 4.436747000  | 0.843306000  |
| C | 7.463008000 | 4.934506000  | 1.762865000  |
| H | 7.325203000 | 4.418412000  | 2.723063000  |
| C | 8.842705000 | 4.529934000  | 1.219393000  |
| H | 8.909163000 | 3.448248000  | 1.067829000  |
| H | 9.036149000 | 5.015075000  | 0.256016000  |
| H | 9.638568000 | 4.825732000  | 1.912480000  |
| C | 7.418438000 | 6.439182000  | 2.039933000  |
| H | 6.435570000 | 6.755866000  | 2.402189000  |
| H | 8.160790000 | 6.705258000  | 2.799683000  |
| H | 7.652691000 | 7.023973000  | 1.143328000  |
| C | 5.935626000 | 3.107987000  | 0.943966000  |
| H | 6.380588000 | 2.463866000  | 1.698414000  |
| C | 4.204314000 | 1.046069000  | 2.750928000  |
| C | 4.947891000 | 0.481354000  | 3.796109000  |
| H | 5.492242000 | -0.439509000 | 3.613788000  |
| C | 5.025044000 | 1.093207000  | 5.051820000  |
| C | 5.856804000 | 0.490171000  | 6.171605000  |
| H | 5.801161000 | 1.185534000  | 7.020470000  |
| C | 5.292002000 | -0.856756000 | 6.640196000  |
| H | 4.259279000 | -0.749114000 | 6.986176000  |
| H | 5.295921000 | -1.593485000 | 5.830045000  |
| H | 5.886192000 | -1.260929000 | 7.467663000  |
| C | 7.335428000 | 0.363000000  | 5.780613000  |
| H | 7.749001000 | 1.328968000  | 5.474027000  |
| H | 7.927676000 | -0.009247000 | 6.624042000  |
| H | 7.468812000 | -0.336271000 | 4.948203000  |
| C | 4.338548000 | 2.291194000  | 5.248101000  |
| H | 4.397568000 | 2.782176000  | 6.219327000  |
| C | 3.590019000 | 2.891655000  | 4.228246000  |
| C | 2.956464000 | 4.248323000  | 4.498920000  |
| H | 2.640838000 | 4.246456000  | 5.552215000  |
| C | 4.003011000 | 5.362521000  | 4.334781000  |
| H | 4.871012000 | 5.189980000  | 4.978343000  |
| H | 4.355895000 | 5.401004000  | 3.298658000  |
| H | 3.578036000 | 6.340408000  | 4.589357000  |
| C | 1.723316000 | 4.554626000  | 3.649187000  |

## SUPPORTING INFORMATION

---

|   |             |              |              |
|---|-------------|--------------|--------------|
| H | 1.267028000 | 5.497295000  | 3.969093000  |
| H | 1.984448000 | 4.660264000  | 2.590967000  |
| H | 0.969861000 | 3.765900000  | 3.736793000  |
| C | 3.523466000 | 2.253996000  | 2.987578000  |
| H | 2.957711000 | 2.697262000  | 2.174642000  |
| C | 4.135186000 | -2.068638000 | 2.078035000  |
| C | 5.250115000 | -2.898719000 | 2.255910000  |
| H | 6.125515000 | -2.732354000 | 1.634164000  |
| C | 5.256758000 | -3.920749000 | 3.211071000  |
| C | 6.470637000 | -4.816083000 | 3.399647000  |
| H | 6.266179000 | -5.450795000 | 4.272811000  |
| C | 7.743795000 | -4.015691000 | 3.703098000  |
| H | 7.612395000 | -3.376709000 | 4.581897000  |
| H | 8.585457000 | -4.690051000 | 3.896047000  |
| H | 8.023473000 | -3.374262000 | 2.860447000  |
| C | 6.678118000 | -5.742661000 | 2.193195000  |
| H | 5.799480000 | -6.372622000 | 2.024130000  |
| H | 6.853678000 | -5.168181000 | 1.277771000  |
| H | 7.541777000 | -6.398274000 | 2.352200000  |
| C | 4.109583000 | -4.110967000 | 3.985837000  |
| H | 4.104673000 | -4.909060000 | 4.726338000  |
| C | 2.973423000 | -3.308249000 | 3.828551000  |
| C | 1.726589000 | -3.553269000 | 4.660894000  |
| H | 0.992181000 | -2.793786000 | 4.360962000  |
| C | 1.112014000 | -4.928917000 | 4.367944000  |
| H | 0.885998000 | -5.043250000 | 3.303903000  |
| H | 1.796431000 | -5.735471000 | 4.653395000  |
| H | 0.183092000 | -5.067933000 | 4.932370000  |
| C | 1.988812000 | -3.377981000 | 6.162400000  |
| H | 2.389553000 | -2.384188000 | 6.382074000  |
| H | 1.064856000 | -3.510731000 | 6.736782000  |
| H | 2.711439000 | -4.115619000 | 6.528268000  |
| C | 3.004679000 | -2.285877000 | 2.876891000  |
| H | 2.131600000 | -1.652435000 | 2.743136000  |
| C | 4.831875000 | -2.424661000 | -0.959259000 |
| C | 4.039335000 | -3.565184000 | -0.735730000 |
| H | 3.158923000 | -3.476111000 | -0.105849000 |
| C | 4.396292000 | -4.814235000 | -1.253518000 |
| C | 3.590524000 | -6.083377000 | -1.005529000 |

## SUPPORTING INFORMATION

---

|   |              |              |              |
|---|--------------|--------------|--------------|
| H | 4.326875000  | -6.864366000 | -0.765184000 |
| C | 2.621024000  | -5.995835000 | 0.173599000  |
| H | 3.122291000  | -5.659308000 | 1.086166000  |
| H | 1.794447000  | -5.307820000 | -0.031986000 |
| H | 2.181165000  | -6.979371000 | 0.369571000  |
| C | 2.857963000  | -6.533538000 | -2.279896000 |
| H | 3.547798000  | -6.647462000 | -3.121900000 |
| H | 2.358169000  | -7.495421000 | -2.119357000 |
| H | 2.095195000  | -5.803254000 | -2.566603000 |
| C | 5.561721000  | -4.907673000 | -2.023425000 |
| H | 5.851459000  | -5.881763000 | -2.414762000 |
| C | 6.365856000  | -3.795564000 | -2.280327000 |
| C | 7.647931000  | -3.916664000 | -3.087455000 |
| H | 8.054036000  | -2.902216000 | -3.194560000 |
| C | 7.395571000  | -4.461733000 | -4.499108000 |
| H | 6.668096000  | -3.846173000 | -5.036651000 |
| H | 8.324739000  | -4.476301000 | -5.079561000 |
| H | 7.009215000  | -5.486626000 | -4.470020000 |
| C | 8.697872000  | -4.761012000 | -2.351667000 |
| H | 8.914600000  | -4.347861000 | -1.361633000 |
| H | 8.350437000  | -5.790949000 | -2.213734000 |
| H | 9.635135000  | -4.798386000 | -2.918268000 |
| C | 5.989144000  | -2.564287000 | -1.739066000 |
| H | 6.625841000  | -1.700485000 | -1.901803000 |
| C | 5.335275000  | 0.494137000  | -2.196514000 |
| C | 6.600939000  | 1.094758000  | -2.276398000 |
| H | 7.113950000  | 1.346213000  | -1.352582000 |
| C | 7.208630000  | 1.356058000  | -3.506777000 |
| C | 8.582545000  | 1.999426000  | -3.592264000 |
| H | 8.882573000  | 1.970609000  | -4.648861000 |
| C | 8.535742000  | 3.473339000  | -3.165722000 |
| H | 7.832080000  | 4.039626000  | -3.783623000 |
| H | 8.213767000  | 3.572838000  | -2.124028000 |
| H | 9.523767000  | 3.938112000  | -3.261797000 |
| C | 9.641426000  | 1.227085000  | -2.795244000 |
| H | 9.692614000  | 0.180727000  | -3.112491000 |
| H | 10.631671000 | 1.674278000  | -2.935923000 |
| H | 9.424532000  | 1.240853000  | -1.721795000 |
| C | 6.514145000  | 1.018315000  | -4.671936000 |



## SUPPORTING INFORMATION

---

|   |              |              |              |
|---|--------------|--------------|--------------|
| H | 6.975156000  | 1.217475000  | -5.638682000 |
| C | 5.245563000  | 0.434470000  | -4.633989000 |
| C | 4.508562000  | 0.136052000  | -5.928410000 |
| H | 5.234298000  | 0.263479000  | -6.743485000 |
| C | 3.375695000  | 1.147928000  | -6.156219000 |
| H | 3.759976000  | 2.172636000  | -6.168393000 |
| H | 2.872115000  | 0.961676000  | -7.111963000 |
| H | 2.628598000  | 1.084275000  | -5.358163000 |
| C | 3.986960000  | -1.303526000 | -6.000137000 |
| H | 3.535734000  | -1.499479000 | -6.979183000 |
| H | 4.792949000  | -2.027228000 | -5.845935000 |
| H | 3.220802000  | -1.491808000 | -5.241182000 |
| C | 4.670586000  | 0.171865000  | -3.385944000 |
| H | 3.688954000  | -0.288827000 | -3.337508000 |
| N | -1.864235000 | 0.361603000  | 3.250354000  |
| N | -1.706874000 | 0.297283000  | 5.834343000  |
| O | 0.684694000  | -3.630606000 | -2.014277000 |
| O | -0.866146000 | -2.035259000 | 0.363495000  |
| O | 1.190844000  | 2.283371000  | 0.471207000  |
| O | -1.045212000 | 2.318132000  | 0.808677000  |
| O | 1.367201000  | 1.360326000  | -2.420140000 |
| O | -0.381461000 | 0.501761000  | -1.369352000 |
| H | 0.147353000  | 3.928900000  | 0.953315000  |
| H | -0.552861000 | 1.694501000  | -3.015444000 |
| C | 1.227949000  | -2.611323000 | -2.114409000 |
| O | 1.790860000  | -1.597326000 | -2.326271000 |

### TS3

|    |              |              |              |
|----|--------------|--------------|--------------|
| Sm | -1.978489000 | -0.040470000 | 0.362028000  |
| Sm | 2.136260000  | 0.078769000  | -0.406145000 |
| C  | -0.059977000 | -2.213182000 | 0.308044000  |
| C  | 0.063747000  | 2.591332000  | 0.858649000  |
| O  | 0.448009000  | -1.119957000 | 0.784431000  |
| C  | 0.130410000  | 1.079986000  | -2.343512000 |
| C  | -0.357697000 | 0.110987000  | 3.535713000  |
| H  | -0.120411000 | 1.126738000  | 3.213615000  |
| H  | 0.330280000  | -0.563366000 | 3.025125000  |
| C  | -0.276010000 | -0.034995000 | 5.080224000  |
| H  | 0.449607000  | -0.805341000 | 5.360756000  |

## SUPPORTING INFORMATION

---

|   |              |              |              |
|---|--------------|--------------|--------------|
| H | 0.052182000  | 0.899627000  | 5.546559000  |
| C | -2.054811000 | -1.587592000 | 3.508109000  |
| H | -1.335231000 | -2.256981000 | 3.030348000  |
| H | -3.043962000 | -1.851728000 | 3.126851000  |
| C | -1.996555000 | -1.678091000 | 5.058476000  |
| H | -2.976106000 | -1.938755000 | 5.473692000  |
| H | -1.289190000 | -2.450967000 | 5.377955000  |
| C | -2.665545000 | 0.751141000  | 3.726545000  |
| H | -3.682614000 | 0.539702000  | 3.384823000  |
| H | -2.391097000 | 1.753466000  | 3.384122000  |
| C | -2.552322000 | 0.625771000  | 5.271629000  |
| H | -2.238696000 | 1.573543000  | 5.722943000  |
| H | -3.520108000 | 0.360160000  | 5.710067000  |
| C | -3.999461000 | -0.636260000 | -1.510384000 |
| C | -4.602803000 | -1.043817000 | -0.280169000 |
| C | -4.872441000 | 0.131569000  | 0.502578000  |
| C | -4.420717000 | 1.268306000  | -0.251399000 |
| C | -3.892304000 | 0.795862000  | -1.497869000 |
| C | -3.808508000 | -1.516026000 | -2.697610000 |
| C | -4.922547000 | -2.210194000 | -3.189356000 |
| H | -5.862851000 | -2.134368000 | -2.651873000 |
| C | -4.850161000 | -2.971428000 | -4.360202000 |
| C | -6.059319000 | -3.717651000 | -4.898408000 |
| H | -5.771241000 | -4.125842000 | -5.876823000 |
| C | -7.263845000 | -2.795384000 | -5.125550000 |
| H | -7.008643000 | -1.965278000 | -5.791833000 |
| H | -8.093848000 | -3.350463000 | -5.576481000 |
| H | -7.626870000 | -2.370298000 | -4.183782000 |
| C | -6.431631000 | -4.901420000 | -3.995303000 |
| H | -5.595284000 | -5.600324000 | -3.898584000 |
| H | -6.696302000 | -4.561614000 | -2.988827000 |
| H | -7.287544000 | -5.448725000 | -4.406539000 |
| C | -3.629238000 | -3.029955000 | -5.032112000 |
| H | -3.559638000 | -3.609801000 | -5.952062000 |
| C | -2.489922000 | -2.361598000 | -4.568409000 |
| C | -1.199155000 | -2.506020000 | -5.359338000 |
| H | -1.493149000 | -2.543741000 | -6.418233000 |
| C | -0.229532000 | -1.334931000 | -5.198547000 |
| H | -0.722939000 | -0.375829000 | -5.387538000 |

## SUPPORTING INFORMATION

---

|   |               |              |              |
|---|---------------|--------------|--------------|
| H | 0.209333000   | -1.308920000 | -4.196106000 |
| H | 0.600825000   | -1.433609000 | -5.904694000 |
| C | -0.507128000  | -3.838729000 | -5.031271000 |
| H | -1.178474000  | -4.686964000 | -5.197869000 |
| H | 0.380816000   | -3.977998000 | -5.657873000 |
| H | -0.187413000  | -3.864840000 | -3.984626000 |
| C | -2.594808000  | -1.606802000 | -3.396502000 |
| H | -1.731583000  | -1.067170000 | -3.021083000 |
| C | -5.125155000  | -2.414240000 | -0.019797000 |
| C | -6.505455000  | -2.592534000 | 0.158854000  |
| H | -7.155100000  | -1.720451000 | 0.156090000  |
| C | -7.065508000  | -3.861048000 | 0.335642000  |
| C | -8.575780000  | -3.989100000 | 0.486553000  |
| H | -8.898391000  | -3.148796000 | 1.117492000  |
| C | -9.276409000  | -3.833731000 | -0.872587000 |
| H | -9.005464000  | -2.890348000 | -1.356182000 |
| H | -8.994161000  | -4.649105000 | -1.547663000 |
| H | -10.365802000 | -3.854155000 | -0.754823000 |
| C | -9.030299000  | -5.279848000 | 1.171752000  |
| H | -8.527159000  | -5.432604000 | 2.131762000  |
| H | -10.108899000 | -5.248811000 | 1.357385000  |
| H | -8.835927000  | -6.158444000 | 0.546314000  |
| C | -6.206802000  | -4.965969000 | 0.337112000  |
| H | -6.611526000  | -5.964889000 | 0.480144000  |
| C | -4.826612000  | -4.825484000 | 0.162381000  |
| C | -3.923736000  | -6.047156000 | 0.193422000  |
| H | -4.578446000  | -6.926126000 | 0.272865000  |
| C | -3.098962000  | -6.195725000 | -1.091574000 |
| H | -2.513053000  | -7.121201000 | -1.066098000 |
| H | -3.743531000  | -6.223821000 | -1.975108000 |
| H | -2.397706000  | -5.364362000 | -1.214835000 |
| C | -3.011322000  | -6.035748000 | 1.428431000  |
| H | -3.594503000  | -5.959668000 | 2.352225000  |
| H | -2.413985000  | -6.953081000 | 1.476694000  |
| H | -2.318841000  | -5.188339000 | 1.391005000  |
| C | -4.297256000  | -3.543051000 | -0.019968000 |
| H | -3.228765000  | -3.415509000 | -0.160067000 |
| C | -5.752158000  | 0.152167000  | 1.701543000  |
| C | -5.682834000  | -0.851725000 | 2.684391000  |

## SUPPORTING INFORMATION

---

|   |               |              |              |
|---|---------------|--------------|--------------|
| H | -4.950150000  | -1.645824000 | 2.577987000  |
| C | -6.569080000  | -0.901640000 | 3.761234000  |
| C | -6.481869000  | -2.026610000 | 4.779578000  |
| H | -5.531346000  | -2.548089000 | 4.601274000  |
| C | -7.608415000  | -3.047968000 | 4.567371000  |
| H | -7.516835000  | -3.881310000 | 5.272951000  |
| H | -8.589787000  | -2.584870000 | 4.719773000  |
| H | -7.580713000  | -3.453145000 | 3.552151000  |
| C | -6.470224000  | -1.521826000 | 6.227533000  |
| H | -5.668661000  | -0.795811000 | 6.396043000  |
| H | -7.416165000  | -1.037445000 | 6.492781000  |
| H | -6.325161000  | -2.355424000 | 6.923049000  |
| C | -7.566507000  | 0.076224000  | 3.844976000  |
| H | -8.281437000  | 0.050184000  | 4.665084000  |
| C | -7.684835000  | 1.079813000  | 2.882472000  |
| C | -8.807806000  | 2.099859000  | 2.975949000  |
| H | -9.432905000  | 1.806160000  | 3.830357000  |
| C | -9.701414000  | 2.086245000  | 1.728630000  |
| H | -10.545797000 | 2.773075000  | 1.853219000  |
| H | -9.147433000  | 2.401111000  | 0.837753000  |
| H | -10.101408000 | 1.085671000  | 1.537015000  |
| C | -8.275883000  | 3.511104000  | 3.257712000  |
| H | -9.102726000  | 4.222824000  | 3.361054000  |
| H | -7.692157000  | 3.532656000  | 4.183486000  |
| H | -7.630081000  | 3.861088000  | 2.445432000  |
| C | -6.767884000  | 1.111525000  | 1.825192000  |
| H | -6.862222000  | 1.876753000  | 1.062964000  |
| C | -4.731850000  | 2.697165000  | 0.032770000  |
| C | -5.615459000  | 3.364392000  | -0.833313000 |
| H | -6.016371000  | 2.825986000  | -1.688318000 |
| C | -5.986307000  | 4.691809000  | -0.624018000 |
| C | -6.930278000  | 5.388116000  | -1.589985000 |
| H | -7.284533000  | 4.623908000  | -2.294488000 |
| C | -8.161147000  | 5.974126000  | -0.886749000 |
| H | -8.700859000  | 5.207599000  | -0.322252000 |
| H | -7.882717000  | 6.769668000  | -0.186951000 |
| H | -8.851617000  | 6.407822000  | -1.618313000 |
| C | -6.197895000  | 6.461815000  | -2.407198000 |
| H | -6.874441000  | 6.925452000  | -3.133803000 |

## SUPPORTING INFORMATION

---

|   |              |              |              |
|---|--------------|--------------|--------------|
| H | -5.810257000 | 7.255676000  | -1.758744000 |
| H | -5.353211000 | 6.031152000  | -2.953041000 |
| C | -5.448913000 | 5.362674000  | 0.483136000  |
| H | -5.718171000 | 6.401817000  | 0.664110000  |
| C | -4.568338000 | 4.734763000  | 1.366068000  |
| C | -3.986060000 | 5.503999000  | 2.540648000  |
| H | -4.438712000 | 6.504610000  | 2.522074000  |
| C | -4.340736000 | 4.866324000  | 3.889525000  |
| H | -5.423271000 | 4.773497000  | 4.012731000  |
| H | -3.909998000 | 3.863299000  | 3.980832000  |
| H | -3.952316000 | 5.470568000  | 4.716827000  |
| C | -2.468335000 | 5.682880000  | 2.400551000  |
| H | -2.213211000 | 6.180406000  | 1.459995000  |
| H | -2.070381000 | 6.285308000  | 3.224742000  |
| H | -1.957581000 | 4.713958000  | 2.415255000  |
| C | -4.221659000 | 3.397289000  | 1.128558000  |
| H | -3.525494000 | 2.898638000  | 1.794594000  |
| C | -3.545112000 | 1.675236000  | -2.643735000 |
| C | -4.063853000 | 1.399444000  | -3.915885000 |
| H | -4.657743000 | 0.502406000  | -4.056892000 |
| C | -3.861950000 | 2.271549000  | -4.991978000 |
| C | -4.456663000 | 1.982838000  | -6.360274000 |
| H | -4.206775000 | 2.838189000  | -7.002900000 |
| C | -5.987065000 | 1.880269000  | -6.309778000 |
| H | -6.432044000 | 2.784995000  | -5.883585000 |
| H | -6.397055000 | 1.740195000  | -7.316086000 |
| H | -6.309537000 | 1.029431000  | -5.700114000 |
| C | -3.839923000 | 0.730033000  | -6.996269000 |
| H | -2.754522000 | 0.831120000  | -7.094515000 |
| H | -4.037537000 | -0.161599000 | -6.392293000 |
| H | -4.256273000 | 0.559478000  | -7.995499000 |
| C | -3.120769000 | 3.432505000  | -4.774711000 |
| H | -2.969576000 | 4.126100000  | -5.601248000 |
| C | -2.579913000 | 3.743812000  | -3.520387000 |
| C | -1.775908000 | 5.027771000  | -3.373012000 |
| H | -2.295852000 | 5.786747000  | -3.975281000 |
| C | -1.699989000 | 5.557695000  | -1.940923000 |
| H | -1.227317000 | 6.545153000  | -1.928842000 |
| H | -2.692176000 | 5.644557000  | -1.488216000 |

## SUPPORTING INFORMATION

---

|   |              |              |              |
|---|--------------|--------------|--------------|
| H | -1.095486000 | 4.903995000  | -1.302470000 |
| C | -0.369579000 | 4.862715000  | -3.970416000 |
| H | 0.181490000  | 5.808775000  | -3.936415000 |
| H | 0.207800000  | 4.118351000  | -3.411440000 |
| H | -0.413487000 | 4.533415000  | -5.013110000 |
| C | -2.798409000 | 2.854658000  | -2.466304000 |
| H | -2.416077000 | 3.085977000  | -1.476738000 |
| C | 4.542111000  | 1.201424000  | 0.409771000  |
| C | 4.200422000  | 0.344844000  | 1.512245000  |
| C | 4.329584000  | -1.011408000 | 1.060563000  |
| C | 4.768890000  | -0.993860000 | -0.302154000 |
| C | 4.877499000  | 0.375748000  | -0.710844000 |
| C | 4.778853000  | 2.667197000  | 0.460570000  |
| C | 4.196202000  | 3.553292000  | -0.455524000 |
| H | 3.498220000  | 3.169368000  | -1.194655000 |
| C | 4.513780000  | 4.914347000  | -0.449159000 |
| C | 3.863690000  | 5.895438000  | -1.411163000 |
| H | 4.509143000  | 6.784398000  | -1.437136000 |
| C | 3.755073000  | 5.363360000  | -2.843612000 |
| H | 3.394939000  | 6.149952000  | -3.515548000 |
| H | 4.722547000  | 5.012433000  | -3.213570000 |
| H | 3.051656000  | 4.527516000  | -2.915056000 |
| C | 2.491355000  | 6.342976000  | -0.885669000 |
| H | 2.569632000  | 6.765319000  | 0.121258000  |
| H | 2.049494000  | 7.102015000  | -1.541157000 |
| H | 1.800748000  | 5.493613000  | -0.841481000 |
| C | 5.434933000  | 5.383655000  | 0.494328000  |
| H | 5.683960000  | 6.442214000  | 0.492081000  |
| C | 6.036032000  | 4.530214000  | 1.424321000  |
| C | 7.088750000  | 5.004815000  | 2.415658000  |
| H | 6.937258000  | 4.423216000  | 3.335627000  |
| C | 8.499578000  | 4.682500000  | 1.896902000  |
| H | 8.610860000  | 3.615037000  | 1.683602000  |
| H | 8.705632000  | 5.231601000  | 0.971125000  |
| H | 9.260930000  | 4.963362000  | 2.633466000  |
| C | 6.980502000  | 6.485937000  | 2.785439000  |
| H | 5.974578000  | 6.746171000  | 3.129235000  |
| H | 7.685202000  | 6.726945000  | 3.588008000  |
| H | 7.225746000  | 7.134361000  | 1.936724000  |

## SUPPORTING INFORMATION

---

|   |             |              |             |
|---|-------------|--------------|-------------|
| C | 5.690848000 | 3.175650000  | 1.394999000 |
| H | 6.151585000 | 2.491865000  | 2.103788000 |
| C | 3.984764000 | 0.799178000  | 2.911262000 |
| C | 4.594467000 | 0.114939000  | 3.973083000 |
| H | 5.173227000 | -0.777035000 | 3.759308000 |
| C | 4.495873000 | 0.571086000  | 5.291993000 |
| C | 5.183498000 | -0.161380000 | 6.432126000 |
| H | 4.970582000 | 0.405228000  | 7.349058000 |
| C | 4.626385000 | -1.577266000 | 6.624769000 |
| H | 3.548070000 | -1.551660000 | 6.811790000 |
| H | 4.796897000 | -2.197299000 | 5.738582000 |
| H | 5.106143000 | -2.070330000 | 7.477838000 |
| C | 6.707676000 | -0.185780000 | 6.252377000 |
| H | 7.110224000 | 0.826839000  | 6.149174000 |
| H | 7.191922000 | -0.659141000 | 7.113790000 |
| H | 6.993331000 | -0.750744000 | 5.358679000 |
| C | 3.774140000 | 1.738557000  | 5.538598000 |
| H | 3.698825000 | 2.109431000  | 6.560569000 |
| C | 3.161405000 | 2.459664000  | 4.506693000 |
| C | 2.490902000 | 3.782319000  | 4.847520000 |
| H | 2.080098000 | 3.677993000  | 5.862000000 |
| C | 3.537401000 | 4.907959000  | 4.888946000 |
| H | 4.342325000 | 4.675378000  | 5.592747000 |
| H | 3.986624000 | 5.044829000  | 3.899429000 |
| H | 3.081086000 | 5.857028000  | 5.193331000 |
| C | 1.337693000 | 4.169142000  | 3.921611000 |
| H | 0.848478000 | 5.079037000  | 4.284423000 |
| H | 1.693576000 | 4.373892000  | 2.906576000 |
| H | 0.581224000 | 3.379530000  | 3.867514000 |
| C | 3.265068000 | 1.973879000  | 3.201571000 |
| H | 2.802918000 | 2.512853000  | 2.382264000 |
| C | 4.278684000 | -2.239587000 | 1.900907000 |
| C | 5.462533000 | -2.958915000 | 2.111033000 |
| H | 6.376012000 | -2.601548000 | 1.643575000 |
| C | 5.485465000 | -4.114213000 | 2.899677000 |
| C | 6.775495000 | -4.884145000 | 3.129941000 |
| H | 6.535927000 | -5.710322000 | 3.813548000 |
| C | 7.845521000 | -4.021865000 | 3.812619000 |
| H | 7.479846000 | -3.608960000 | 4.757977000 |

## SUPPORTING INFORMATION

---

|   |             |              |              |
|---|-------------|--------------|--------------|
| H | 8.741916000 | -4.615107000 | 4.024697000  |
| H | 8.148369000 | -3.183716000 | 3.175466000  |
| C | 7.311723000 | -5.500459000 | 1.830954000  |
| H | 6.572769000 | -6.164252000 | 1.372811000  |
| H | 7.560772000 | -4.728756000 | 1.095428000  |
| H | 8.218580000 | -6.083800000 | 2.026669000  |
| C | 4.287486000 | -4.550408000 | 3.472400000  |
| H | 4.297425000 | -5.454732000 | 4.078240000  |
| C | 3.084640000 | -3.860960000 | 3.280172000  |
| C | 1.782179000 | -4.375477000 | 3.869194000  |
| H | 1.021328000 | -3.606812000 | 3.675469000  |
| C | 1.325808000 | -5.661009000 | 3.164374000  |
| H | 1.221735000 | -5.504372000 | 2.087005000  |
| H | 2.049721000 | -6.469210000 | 3.317534000  |
| H | 0.360003000 | -5.999226000 | 3.556532000  |
| C | 1.859887000 | -4.578097000 | 5.387438000  |
| H | 2.168328000 | -3.661044000 | 5.898211000  |
| H | 0.886166000 | -4.883260000 | 5.786841000  |
| H | 2.578721000 | -5.361787000 | 5.649960000  |
| C | 3.099744000 | -2.703028000 | 2.498381000  |
| H | 2.171853000 | -2.162720000 | 2.331284000  |
| C | 5.294688000 | -2.164088000 | -1.050777000 |
| C | 4.636897000 | -3.401177000 | -1.092086000 |
| H | 3.685020000 | -3.510889000 | -0.585197000 |
| C | 5.193621000 | -4.501284000 | -1.752485000 |
| C | 4.471391000 | -5.834831000 | -1.870961000 |
| H | 5.251856000 | -6.606466000 | -1.937163000 |
| C | 3.583706000 | -6.175975000 | -0.671369000 |
| H | 4.124627000 | -6.076910000 | 0.274627000  |
| H | 2.702333000 | -5.528612000 | -0.626365000 |
| H | 3.222382000 | -7.206800000 | -0.753025000 |
| C | 3.658828000 | -5.887710000 | -3.175246000 |
| H | 4.293237000 | -5.699223000 | -4.047263000 |
| H | 3.186926000 | -6.869091000 | -3.300461000 |
| H | 2.868895000 | -5.128989000 | -3.161571000 |
| C | 6.443770000 | -4.351611000 | -2.360292000 |
| H | 6.882263000 | -5.209935000 | -2.867454000 |
| C | 7.140759000 | -3.140513000 | -2.322345000 |
| C | 8.514242000 | -2.997262000 | -2.956883000 |



## SUPPORTING INFORMATION

---

|   |              |              |              |
|---|--------------|--------------|--------------|
| H | 8.834917000  | -1.960263000 | -2.790743000 |
| C | 8.472297000  | -3.227407000 | -4.473441000 |
| H | 7.771904000  | -2.539568000 | -4.956366000 |
| H | 9.462302000  | -3.073365000 | -4.917506000 |
| H | 8.157201000  | -4.249172000 | -4.712401000 |
| C | 9.549208000  | -3.913714000 | -2.289968000 |
| H | 9.609963000  | -3.725539000 | -1.213461000 |
| H | 9.292694000  | -4.969786000 | -2.428968000 |
| H | 10.544358000 | -3.754626000 | -2.720482000 |
| C | 6.551281000  | -2.058500000 | -1.667576000 |
| H | 7.086673000  | -1.114942000 | -1.619905000 |
| C | 5.385218000  | 0.840362000  | -2.028306000 |
| C | 6.504929000  | 1.681690000  | -2.095724000 |
| H | 6.961438000  | 2.017787000  | -1.169183000 |
| C | 7.052805000  | 2.062695000  | -3.323936000 |
| C | 8.295263000  | 2.934994000  | -3.398569000 |
| H | 8.568819000  | 3.008731000  | -4.459992000 |
| C | 8.026366000  | 4.358255000  | -2.891280000 |
| H | 7.236931000  | 4.842344000  | -3.474495000 |
| H | 7.708704000  | 4.352852000  | -1.843435000 |
| H | 8.929712000  | 4.974213000  | -2.967890000 |
| C | 9.485060000  | 2.304695000  | -2.662235000 |
| H | 9.696726000  | 1.299147000  | -3.039022000 |
| H | 10.386381000 | 2.914106000  | -2.791741000 |
| H | 9.292138000  | 2.225383000  | -1.586974000 |
| C | 6.439848000  | 1.605028000  | -4.494178000 |
| H | 6.857139000  | 1.896176000  | -5.457548000 |
| C | 5.312775000  | 0.778440000  | -4.467154000 |
| C | 4.655621000  | 0.344693000  | -5.766563000 |
| H | 5.371598000  | 0.561730000  | -6.571471000 |
| C | 3.391124000  | 1.174296000  | -6.038023000 |
| H | 3.619250000  | 2.244536000  | -6.066960000 |
| H | 2.941683000  | 0.894869000  | -6.997870000 |
| H | 2.645153000  | 1.015126000  | -5.252435000 |
| C | 4.348821000  | -1.156270000 | -5.814235000 |
| H | 3.959906000  | -1.433551000 | -6.800298000 |
| H | 5.244050000  | -1.754526000 | -5.620665000 |
| H | 3.595074000  | -1.439543000 | -5.072686000 |
| C | 4.802166000  | 0.396056000  | -3.223377000 |

## SUPPORTING INFORMATION

---

|   |              |              |              |
|---|--------------|--------------|--------------|
| H | 3.948903000  | -0.276339000 | -3.179430000 |
| N | -1.736036000 | -0.203649000 | 3.064524000  |
| N | -1.578896000 | -0.401701000 | 5.636810000  |
| O | 0.795929000  | -3.465777000 | -1.092211000 |
| O | -1.311877000 | -2.350136000 | 0.331083000  |
| O | 1.135457000  | 1.974998000  | 0.643130000  |
| O | -1.090255000 | 2.084780000  | 0.955481000  |
| O | 1.356761000  | 1.323791000  | -2.395197000 |
| O | -0.386005000 | 0.402044000  | -1.388440000 |
| H | 0.130410000  | 3.683665000  | 0.990306000  |
| H | -0.535237000 | 1.453844000  | -3.132720000 |
| C | 1.505437000  | -2.876802000 | -1.887133000 |
| O | 1.926806000  | -1.710943000 | -1.970232000 |

### 8

|    |              |              |              |
|----|--------------|--------------|--------------|
| Sm | -1.976961000 | 0.055345000  | 0.445686000  |
| Sm | 2.089746000  | 0.013087000  | -0.285780000 |
| C  | 0.115709000  | -1.747874000 | 0.520175000  |
| C  | 0.113288000  | 2.753080000  | 0.421833000  |
| O  | 0.292743000  | -0.602074000 | 1.178881000  |
| C  | 0.204060000  | 0.258281000  | -2.526811000 |
| C  | -0.626126000 | 0.764821000  | 3.651035000  |
| H  | -0.349532000 | 1.702024000  | 3.162906000  |
| H  | 0.091652000  | 0.010391000  | 3.330558000  |
| C  | -0.681655000 | 0.904848000  | 5.196355000  |
| H  | 0.086635000  | 0.285313000  | 5.670834000  |
| H  | -0.500266000 | 1.938921000  | 5.509040000  |
| C  | -2.297591000 | -0.958216000 | 3.720042000  |
| H  | -1.573256000 | -1.683736000 | 3.337611000  |
| H  | -3.284980000 | -1.258440000 | 3.357786000  |
| C  | -2.267652000 | -0.869618000 | 5.272553000  |
| H  | -3.225355000 | -1.184651000 | 5.701348000  |
| H  | -1.493349000 | -1.523716000 | 5.687445000  |
| C  | -2.943197000 | 1.381231000  | 3.592377000  |
| H  | -3.920527000 | 1.158113000  | 3.157589000  |
| H  | -2.609206000 | 2.346041000  | 3.197609000  |
| C  | -3.007416000 | 1.388846000  | 5.144510000  |
| H  | -2.846701000 | 2.397448000  | 5.541145000  |
| H  | -3.989842000 | 1.052740000  | 5.492535000  |

## SUPPORTING INFORMATION

---

|   |              |              |              |
|---|--------------|--------------|--------------|
| C | -3.914237000 | -0.866115000 | -1.382855000 |
| C | -4.602201000 | -0.987292000 | -0.138062000 |
| C | -4.895527000 | 0.332273000  | 0.348522000  |
| C | -4.359221000 | 1.269543000  | -0.597976000 |
| C | -3.762801000 | 0.532315000  | -1.673436000 |
| C | -3.725274000 | -1.999800000 | -2.333528000 |
| C | -4.883049000 | -2.602502000 | -2.846994000 |
| H | -5.847862000 | -2.249325000 | -2.495857000 |
| C | -4.813777000 | -3.620537000 | -3.801886000 |
| C | -6.054743000 | -4.309292000 | -4.345555000 |
| H | -5.766856000 | -4.770276000 | -5.300683000 |
| C | -7.215773000 | -3.352332000 | -4.631854000 |
| H | -6.909355000 | -2.537595000 | -5.295324000 |
| H | -8.041018000 | -3.888966000 | -5.112066000 |
| H | -7.611256000 | -2.907798000 | -3.712505000 |
| C | -6.495414000 | -5.440307000 | -3.403023000 |
| H | -5.692963000 | -6.170965000 | -3.262003000 |
| H | -6.757951000 | -5.042289000 | -2.417320000 |
| H | -7.369375000 | -5.965535000 | -3.805141000 |
| C | -3.550190000 | -4.034385000 | -4.227442000 |
| H | -3.479239000 | -4.822134000 | -4.977312000 |
| C | -2.371863000 | -3.478356000 | -3.718114000 |
| C | -1.043141000 | -4.046997000 | -4.191819000 |
| H | -1.156368000 | -4.246488000 | -5.267342000 |
| C | 0.145886000  | -3.102245000 | -4.021160000 |
| H | -0.037248000 | -2.135632000 | -4.501217000 |
| H | 0.374919000  | -2.928977000 | -2.964185000 |
| H | 1.040383000  | -3.536318000 | -4.479573000 |
| C | -0.766511000 | -5.393958000 | -3.504825000 |
| H | -1.595824000 | -6.093538000 | -3.647880000 |
| H | 0.141554000  | -5.855676000 | -3.906891000 |
| H | -0.627484000 | -5.254332000 | -2.427573000 |
| C | -2.475015000 | -2.453871000 | -2.771535000 |
| H | -1.579342000 | -2.003456000 | -2.359954000 |
| C | -5.132321000 | -2.274373000 | 0.385505000  |
| C | -6.515121000 | -2.446146000 | 0.542649000  |
| H | -7.178640000 | -1.613212000 | 0.323111000  |
| C | -7.060132000 | -3.660697000 | 0.968987000  |
| C | -8.573505000 | -3.794707000 | 1.078908000  |

## SUPPORTING INFORMATION

---

|   |               |              |              |
|---|---------------|--------------|--------------|
| H | -8.942821000  | -2.843373000 | 1.487280000  |
| C | -9.208361000  | -3.970937000 | -0.309836000 |
| H | -8.932540000  | -3.153138000 | -0.982377000 |
| H | -8.876789000  | -4.908608000 | -0.769168000 |
| H | -10.301665000 | -3.997550000 | -0.238577000 |
| C | -9.038771000  | -4.910172000 | 2.017893000  |
| H | -8.579533000  | -4.829882000 | 3.008166000  |
| H | -10.125428000 | -4.866999000 | 2.144875000  |
| H | -8.800581000  | -5.901200000 | 1.615443000  |
| C | -6.184375000  | -4.716183000 | 1.245690000  |
| H | -6.578954000  | -5.670031000 | 1.586879000  |
| C | -4.800657000  | -4.582545000 | 1.095882000  |
| C | -3.882616000  | -5.757045000 | 1.388511000  |
| H | -4.518027000  | -6.576968000 | 1.751004000  |
| C | -3.173137000  | -6.245216000 | 0.118251000  |
| H | -2.552358000  | -7.122053000 | 0.334019000  |
| H | -3.895721000  | -6.519232000 | -0.656333000 |
| H | -2.523662000  | -5.466152000 | -0.293501000 |
| C | -2.868660000  | -5.434094000 | 2.493790000  |
| H | -3.371772000  | -5.102843000 | 3.408372000  |
| H | -2.268506000  | -6.317817000 | 2.737208000  |
| H | -2.180273000  | -4.643727000 | 2.177067000  |
| C | -4.286013000  | -3.355956000 | 0.661503000  |
| H | -3.214327000  | -3.237658000 | 0.522105000  |
| C | -5.884648000  | 0.625691000  | 1.419911000  |
| C | -5.929067000  | -0.109749000 | 2.617670000  |
| H | -5.197350000  | -0.894770000 | 2.783306000  |
| C | -6.916933000  | 0.095891000  | 3.582307000  |
| C | -6.936763000  | -0.739011000 | 4.852456000  |
| H | -5.960916000  | -1.239870000 | 4.921503000  |
| C | -8.008010000  | -1.835794000 | 4.772999000  |
| H | -7.994132000  | -2.462215000 | 5.672059000  |
| H | -9.008209000  | -1.397120000 | 4.684081000  |
| H | -7.843434000  | -2.478517000 | 3.903837000  |
| C | -7.114279000  | 0.104560000  | 6.120820000  |
| H | -6.367905000  | 0.902663000  | 6.184543000  |
| H | -8.103223000  | 0.573956000  | 6.157022000  |
| H | -7.019717000  | -0.522082000 | 7.014125000  |
| C | -7.905766000  | 1.051497000  | 3.325235000  |

## SUPPORTING INFORMATION

---

|   |               |             |              |
|---|---------------|-------------|--------------|
| H | -8.697679000  | 1.219923000 | 4.052399000  |
| C | -7.913306000  | 1.790577000 | 2.141144000  |
| C | -9.023836000  | 2.793476000 | 1.874139000  |
| H | -9.744546000  | 2.695266000 | 2.697575000  |
| C | -9.774415000  | 2.489814000 | 0.570886000  |
| H | -10.619300000 | 3.175775000 | 0.444844000  |
| H | -9.122634000  | 2.604816000 | -0.301740000 |
| H | -10.162794000 | 1.466583000 | 0.565060000  |
| C | -8.502791000  | 4.236665000 | 1.887881000  |
| H | -9.323257000  | 4.946393000 | 1.732632000  |
| H | -8.027371000  | 4.472512000 | 2.845253000  |
| H | -7.762519000  | 4.398816000 | 1.097224000  |
| C | -6.894315000  | 1.576352000 | 1.206467000  |
| H | -6.898980000  | 2.135532000 | 0.277403000  |
| C | -4.617993000  | 2.734741000 | -0.617877000 |
| C | -5.354606000  | 3.271942000 | -1.687982000 |
| H | -5.687344000  | 2.605751000 | -2.479832000 |
| C | -5.667008000  | 4.628926000 | -1.756480000 |
| C | -6.460583000  | 5.178712000 | -2.929994000 |
| H | -6.739224000  | 4.320481000 | -3.555851000 |
| C | -7.758623000  | 5.863774000 | -2.482926000 |
| H | -8.381273000  | 5.187661000 | -1.889051000 |
| H | -7.554878000  | 6.750973000 | -1.873071000 |
| H | -8.341798000  | 6.188689000 | -3.351577000 |
| C | -5.609597000  | 6.119704000 | -3.793867000 |
| H | -6.178320000  | 6.468585000 | -4.662984000 |
| H | -5.294935000  | 7.002419000 | -3.225959000 |
| H | -4.709498000  | 5.614225000 | -4.155935000 |
| C | -5.219797000  | 5.464958000 | -0.723657000 |
| H | -5.444482000  | 6.529556000 | -0.758314000 |
| C | -4.486449000  | 4.969613000 | 0.356052000  |
| C | -4.000522000  | 5.909245000 | 1.447412000  |
| H | -4.374171000  | 6.911064000 | 1.195861000  |
| C | -4.567376000  | 5.541975000 | 2.824423000  |
| H | -5.660823000  | 5.531372000 | 2.812550000  |
| H | -4.231557000  | 4.548804000 | 3.142072000  |
| H | -4.239645000  | 6.262096000 | 3.582398000  |
| C | -2.468179000  | 5.986929000 | 1.485149000  |
| H | -2.065039000  | 6.300494000 | 0.517326000  |

## SUPPORTING INFORMATION

---

|   |              |              |              |
|---|--------------|--------------|--------------|
| H | -2.133661000 | 6.704206000  | 2.242962000  |
| H | -2.031515000 | 5.012187000  | 1.728480000  |
| C | -4.196958000 | 3.598960000  | 0.396447000  |
| H | -3.618850000 | 3.199988000  | 1.224150000  |
| C | -3.249445000 | 1.133149000  | -2.931043000 |
| C | -3.575387000 | 0.566023000  | -4.170163000 |
| H | -4.170622000 | -0.340208000 | -4.192638000 |
| C | -3.176667000 | 1.159435000  | -5.374488000 |
| C | -3.557649000 | 0.550154000  | -6.713370000 |
| H | -3.154079000 | 1.212762000  | -7.491228000 |
| C | -5.079859000 | 0.495570000  | -6.901843000 |
| H | -5.529205000 | 1.487964000  | -6.795107000 |
| H | -5.332367000 | 0.111395000  | -7.896408000 |
| H | -5.547195000 | -0.164268000 | -6.162983000 |
| C | -2.926712000 | -0.834426000 | -6.910957000 |
| H | -1.835878000 | -0.785410000 | -6.834165000 |
| H | -3.282140000 | -1.546117000 | -6.158548000 |
| H | -3.179174000 | -1.235684000 | -7.898922000 |
| C | -2.441802000 | 2.342747000  | -5.320606000 |
| H | -2.140026000 | 2.821527000  | -6.251677000 |
| C | -2.093077000 | 2.942791000  | -4.102931000 |
| C | -1.276629000 | 4.226515000  | -4.131809000 |
| H | -1.680200000 | 4.830177000  | -4.957835000 |
| C | -1.382969000 | 5.067155000  | -2.859048000 |
| H | -0.878315000 | 6.028740000  | -2.998302000 |
| H | -2.424212000 | 5.261774000  | -2.585573000 |
| H | -0.902022000 | 4.570450000  | -2.009226000 |
| C | 0.193071000  | 3.927756000  | -4.466666000 |
| H | 0.768189000  | 4.854713000  | -4.564970000 |
| H | 0.656136000  | 3.325904000  | -3.676920000 |
| H | 0.286295000  | 3.370285000  | -5.403635000 |
| C | -2.498300000 | 2.324285000  | -2.920025000 |
| H | -2.252165000 | 2.776787000  | -1.965208000 |
| C | 4.600908000  | 1.179640000  | 0.230705000  |
| C | 4.251313000  | 0.490910000  | 1.440806000  |
| C | 4.287903000  | -0.916024000 | 1.168680000  |
| C | 4.666557000  | -1.095015000 | -0.201673000 |
| C | 4.851928000  | 0.200339000  | -0.782941000 |
| C | 4.925144000  | 2.623781000  | 0.106308000  |

## SUPPORTING INFORMATION

---

|   |             |              |              |
|---|-------------|--------------|--------------|
| C | 4.378917000 | 3.437517000  | -0.893967000 |
| H | 3.645979000 | 3.015940000  | -1.576473000 |
| C | 4.763275000 | 4.775179000  | -1.031092000 |
| C | 4.143957000 | 5.677320000  | -2.085766000 |
| H | 4.746266000 | 6.595949000  | -2.109936000 |
| C | 4.180703000 | 5.067165000  | -3.491097000 |
| H | 3.802745000 | 5.782527000  | -4.229901000 |
| H | 5.198917000 | 4.787593000  | -3.775571000 |
| H | 3.560805000 | 4.167282000  | -3.557585000 |
| C | 2.714270000 | 6.078069000  | -1.694062000 |
| H | 2.693734000 | 6.558493000  | -0.710559000 |
| H | 2.289908000 | 6.776895000  | -2.423971000 |
| H | 2.062364000 | 5.198915000  | -1.651590000 |
| C | 5.716793000 | 5.293298000  | -0.148588000 |
| H | 6.015354000 | 6.332954000  | -0.260612000 |
| C | 6.285700000 | 4.511320000  | 0.861804000  |
| C | 7.368026000 | 5.035334000  | 1.794301000  |
| H | 7.235103000 | 4.512908000  | 2.751687000  |
| C | 8.762625000 | 4.668781000  | 1.261762000  |
| H | 8.859990000 | 3.589123000  | 1.112293000  |
| H | 8.949916000 | 5.157553000  | 0.298968000  |
| H | 9.544632000 | 4.987422000  | 1.960437000  |
| C | 7.279612000 | 6.537606000  | 2.074835000  |
| H | 6.285085000 | 6.825805000  | 2.428843000  |
| H | 8.007476000 | 6.821836000  | 2.842002000  |
| H | 7.505793000 | 7.131607000  | 1.182276000  |
| C | 5.874002000 | 3.181065000  | 0.975557000  |
| H | 6.306751000 | 2.554389000  | 1.751466000  |
| C | 4.105381000 | 1.136030000  | 2.770956000  |
| C | 4.798145000 | 0.619523000  | 3.874812000  |
| H | 5.378490000 | -0.289154000 | 3.749980000  |
| C | 4.778215000 | 1.263727000  | 5.116481000  |
| C | 5.556155000 | 0.715103000  | 6.301059000  |
| H | 5.444561000 | 1.440085000  | 7.119103000  |
| C | 4.983752000 | -0.622115000 | 6.788497000  |
| H | 3.932282000 | -0.516251000 | 7.073639000  |
| H | 5.041869000 | -1.388319000 | 6.008343000  |
| H | 5.536603000 | -0.986399000 | 7.661761000  |
| C | 7.055499000 | 0.596058000  | 5.996959000  |

## SUPPORTING INFORMATION

---

|   |             |              |             |
|---|-------------|--------------|-------------|
| H | 7.472533000 | 1.555982000  | 5.676450000 |
| H | 7.604402000 | 0.265265000  | 6.885673000 |
| H | 7.244594000 | -0.132451000 | 5.201377000 |
| C | 4.043281000 | 2.442832000  | 5.240087000 |
| H | 4.027129000 | 2.958242000  | 6.200182000 |
| C | 3.343071000 | 2.995549000  | 4.160839000 |
| C | 2.659161000 | 4.341076000  | 4.352266000 |
| H | 2.290370000 | 4.365731000  | 5.387835000 |
| C | 3.682961000 | 5.478234000  | 4.201843000 |
| H | 4.520780000 | 5.350585000  | 4.893929000 |
| H | 4.087991000 | 5.491852000  | 3.184299000 |
| H | 3.220206000 | 6.451807000  | 4.400799000 |
| C | 1.462939000 | 4.583198000  | 3.431355000 |
| H | 0.967219000 | 5.524223000  | 3.691740000 |
| H | 1.773755000 | 4.658374000  | 2.383938000 |
| H | 0.724165000 | 3.779434000  | 3.510751000 |
| C | 3.374845000 | 2.327112000  | 2.935244000 |
| H | 2.851287000 | 2.738014000  | 2.078116000 |
| C | 4.169527000 | -2.006848000 | 2.171758000 |
| C | 5.264534000 | -2.852756000 | 2.390362000 |
| H | 6.160137000 | -2.708003000 | 1.792925000 |
| C | 5.224242000 | -3.864870000 | 3.355384000 |
| C | 6.414247000 | -4.781306000 | 3.586928000 |
| H | 6.182099000 | -5.387279000 | 4.473580000 |
| C | 7.701929000 | -4.003868000 | 3.888002000 |
| H | 7.571616000 | -3.333102000 | 4.743120000 |
| H | 8.522009000 | -4.692990000 | 4.118035000 |
| H | 8.013726000 | -3.397666000 | 3.030674000 |
| C | 6.614325000 | -5.744358000 | 2.408041000 |
| H | 5.720492000 | -6.353244000 | 2.241261000 |
| H | 6.818542000 | -5.198650000 | 1.481110000 |
| H | 7.456687000 | -6.419408000 | 2.597376000 |
| C | 4.051406000 | -4.030529000 | 4.095767000 |
| H | 4.011866000 | -4.823427000 | 4.840813000 |
| C | 2.933024000 | -3.212137000 | 3.896688000 |
| C | 1.651801000 | -3.437557000 | 4.681282000 |
| H | 0.950402000 | -2.648001000 | 4.377897000 |
| C | 1.010014000 | -4.786490000 | 4.327200000 |
| H | 0.820897000 | -4.865341000 | 3.252729000 |



## SUPPORTING INFORMATION

---

|   |              |              |              |
|---|--------------|--------------|--------------|
| H | 1.662989000  | -5.618567000 | 4.613019000  |
| H | 0.057748000  | -4.916190000 | 4.853801000  |
| C | 1.863985000  | -3.311566000 | 6.195223000  |
| H | 2.294322000  | -2.340573000 | 6.456537000  |
| H | 0.914622000  | -3.422637000 | 6.731496000  |
| H | 2.542735000  | -4.086445000 | 6.567856000  |
| C | 3.012280000  | -2.199628000 | 2.938797000  |
| H | 2.151744000  | -1.555851000 | 2.773726000  |
| C | 5.036668000  | -2.392789000 | -0.820950000 |
| C | 4.200217000  | -3.516023000 | -0.753939000 |
| H | 3.220939000  | -3.414210000 | -0.297801000 |
| C | 4.618459000  | -4.756523000 | -1.245719000 |
| C | 3.735828000  | -5.995105000 | -1.206152000 |
| H | 4.397897000  | -6.842059000 | -0.973745000 |
| C | 2.646169000  | -5.953382000 | -0.133253000 |
| H | 3.065169000  | -5.747044000 | 0.856517000  |
| H | 1.897243000  | -5.183324000 | -0.345661000 |
| H | 2.124539000  | -6.915501000 | -0.089025000 |
| C | 3.126615000  | -6.260939000 | -2.591730000 |
| H | 3.901492000  | -6.347829000 | -3.359973000 |
| H | 2.541205000  | -7.187497000 | -2.590318000 |
| H | 2.461759000  | -5.439857000 | -2.878925000 |
| C | 5.892677000  | -4.856120000 | -1.814296000 |
| H | 6.223403000  | -5.825018000 | -2.186449000 |
| C | 6.747450000  | -3.754055000 | -1.908096000 |
| C | 8.136480000  | -3.881691000 | -2.511589000 |
| H | 8.590104000  | -2.882061000 | -2.483634000 |
| C | 8.085512000  | -4.323118000 | -3.980140000 |
| H | 7.487478000  | -3.630380000 | -4.579618000 |
| H | 9.093183000  | -4.363062000 | -4.408896000 |
| H | 7.642834000  | -5.320347000 | -4.080233000 |
| C | 9.030577000  | -4.818716000 | -1.687709000 |
| H | 9.099980000  | -4.486600000 | -0.647190000 |
| H | 8.636915000  | -5.841304000 | -1.685137000 |
| H | 10.044203000 | -4.854102000 | -2.102740000 |
| C | 6.303831000  | -2.529061000 | -1.406870000 |
| H | 6.962129000  | -1.665933000 | -1.452899000 |
| C | 5.407040000  | 0.461844000  | -2.137186000 |
| C | 6.610876000  | 1.170726000  | -2.264539000 |

## SUPPORTING INFORMATION

---

|   |              |              |              |
|---|--------------|--------------|--------------|
| H | 7.085564000  | 1.556186000  | -1.366491000 |
| C | 7.211509000  | 1.365548000  | -3.511061000 |
| C | 8.534393000  | 2.102156000  | -3.643938000 |
| H | 8.825877000  | 2.045340000  | -4.701710000 |
| C | 8.397688000  | 3.586868000  | -3.281893000 |
| H | 7.658515000  | 4.080619000  | -3.920131000 |
| H | 8.076187000  | 3.714115000  | -2.243039000 |
| H | 9.354538000  | 4.106856000  | -3.405937000 |
| C | 9.648269000  | 1.435120000  | -2.825907000 |
| H | 9.766646000  | 0.382642000  | -3.102139000 |
| H | 10.606126000 | 1.940771000  | -2.991466000 |
| H | 9.434076000  | 1.476715000  | -1.752537000 |
| C | 6.570265000  | 0.854533000  | -4.643615000 |
| H | 7.026547000  | 1.002953000  | -5.621664000 |
| C | 5.362336000  | 0.157578000  | -4.558566000 |
| C | 4.678272000  | -0.348706000 | -5.817167000 |
| H | 5.369105000  | -0.163469000 | -6.651315000 |
| C | 3.388794000  | 0.436125000  | -6.100092000 |
| H | 3.592722000  | 1.507572000  | -6.193339000 |
| H | 2.924256000  | 0.094679000  | -7.032283000 |
| H | 2.664349000  | 0.303983000  | -5.289896000 |
| C | 4.405433000  | -1.857054000 | -5.771495000 |
| H | 3.970745000  | -2.197260000 | -6.718045000 |
| H | 5.324772000  | -2.423295000 | -5.595127000 |
| H | 3.700701000  | -2.112779000 | -4.973595000 |
| C | 4.797020000  | -0.038371000 | -3.294630000 |
| H | 3.862651000  | -0.585879000 | -3.208465000 |
| N | -1.962532000 | 0.364995000  | 3.128260000  |
| N | -1.992490000 | 0.499248000  | 5.707380000  |
| O | 1.122336000  | -2.208762000 | -0.103817000 |
| O | -1.086484000 | -2.179953000 | 0.464964000  |
| O | 1.202124000  | 2.168723000  | 0.185458000  |
| O | -1.011538000 | 2.223404000  | 0.637859000  |
| O | 1.456878000  | 0.256013000  | -2.644940000 |
| O | -0.358140000 | 0.143332000  | -1.391761000 |
| H | 0.144422000  | 3.855223000  | 0.449909000  |
| H | -0.427561000 | 0.366941000  | -3.418371000 |

## References

- [1] P. B. Hitchcock, A. V. Khvostov and M. F. Lappert, *J. Organomet. Chem.* 2002, **663**, 263-268.
- [2] a) P. Girard, J. L. Namy and H. B. Kagan, *J. Am. Chem. Soc.* 1980, **102**, 2693-2698; b) W. J. Evans, T. S. Gammersheimer and J. W. Ziller, *J. Am. Chem. Soc.* 1995, **117**, 8999-9002.
- [3] X. Shi, G. Qin, Y. Wang, L. Zhao, Z. Liu and J. Cheng, *Angew. Chem. Int. Ed.* 2019, **58**, 4356-4360.
- [4] SMART Software Users Guide, Version 4.21; Bruker AXS, Inc.: Madison, WI, 1997.
- [5] SAINT, Version 6.45; Bruker AXS, Inc.: Madison, WI, 2003.
- [6] G. M. Sheldrick, SADABS, Version 2.10; Bruker AXS, Inc.: Madison, WI, 2003.
- [7] G. M. Sheldrick, *Acta Cryst.* 2015, **C71**, 3-8.
- [8] L. Palatinus and G. Chapuis, *J. Appl. Cryst.* 2007, **40**, 786-790.
- [9] L. Palatinus, S. J. Prathapa and S. van Smaalen, *J. Appl. Cryst.* 2012, **45**, 575-580.
- [10] L. J. Farrugia, *J. Appl. Cryst.* 2012, **45**, 849-854.
- [11] P. Van der. Sluis and A. L. Spek, *Acta Cryst.* 1990, **A46**, 194-201.
- [12] A. L. Spek, *Acta Cryst.* 2009, **D65**, 148-155.
- [13]. (a) M. Dolg, H. Stoll, A. Savin, H. Preuss, *Theor. Chim. Acta.* 1989, **75**, 173-194; (b) M. Dolg, H. Stoll, H. Preuss, *Theor. Chim. Acta.* 1993, **85**, 441-450.
- [14]. (a) P. C. Hariharan and J. A. Pople, *Theor. Chim. Acta.* 1973, **28**, 213-222; (b) W. J. Hehre, R. Ditchfield and J. A. Pople, *J. Chem. Phys.* 1972, **56**, 2257-2261.
- [15]. Gaussian 09, Revision D.01, M. J. Frisch, G. W. Trucks, H. B. Schlegel, G. E. Scuseria, M. A. Robb, J. R. Cheeseman, G. Scalmani, V. Barone, B. Mennucci, G. A. Petersson, H. Nakatsuji, M. Caricato, X. Li, H. P. Hratchian, A. F. Izmaylov, J. Bloino, G. Zheng, J. L. Sonnenberg, M. Hada, M. Ehara, K. Toyota, R. Fukuda, J. Hasegawa, M. Ishida, T. Nakajima, Y. Honda, O. Kitao, H. Nakai, T. Vreven, J. A. Montgomery Jr., J. E. Peralta, F. Ogliaro, M. Bearpark, J. J. Heyd, E. Brothers, K. N. Kudin, V. N. Staroverov, R. Kobayashi, J. Normand, K. Raghavachari, A. Rendell, J. C. Burant, S. S. Iyengar, J. Tomasi, M. Cossi, N. Rega, M. J. Millam, M. Klene, J. E. Knox, J. B. Cross, V. Bakken, C. Adamo, J. Jaramillo, R. Gomperts, R. E. Stratmann, O. Yazyev, A. J. Austin, R. Cammi, C. Pomelli, J. W. Ochterski, R. L. Martin, K. Morokuma, V. G. Zakrzewski, G. A. Voth, P. Salvador, J. J. Dannenberg, S. Dapprich, A. D. Daniels, Ö. Farkas, J. B. Foresman, J. V. Ortiz, J. Cioslowski, D. J. Fox, Gaussian, Inc., Wallingford CT, 2009.
